# Supplementary material for: Nut consumption and risk of cardiovascular disease, total cancer, all-cause and cause-specific mortality: a systematic review and dose-response meta-analysis of prospective studies
Source: Springer Nature journal article supplement (doi:10.1186/s12916-016-0730-3), 2016-12-01
Supplement: 12916_2016_730_MOESM1_ESM.pdf [file 12916_2016_730_MOESM1_ESM.pdf]

**Supplementary Figures and Tables for Aune D, Keum N, Giovannucci E, Fadnes LT, Boffetta P, Greenwood DC, Tonstad S, Vatten LJ, Riboli E. Norat T. Nut consumption and risk of cardiovascular disease, cancer, all-cause and cause-specific mortality – a systematic review and dose-response meta-analysis of prospective studies. BMC Medicine 2016; DOI 10.1186/s12916-016-0730-3.**

### Supplementary Table 1. Search strategy in PubMed

|                              |
|------------------------------|
| 1. fruits                    |
| 2. vegetables                |
| 3. fruit                     |
| 4. vegetable                 |
| 5. berry                     |
| 6. berries                   |
| 7. citrus                    |
| 8. "citrus fruits"           |
| 9. cruciferae                |
| 10. "cruciferous vegetables" |
| 11. cabbages                 |
| 12. "allium vegetables"      |
| 13. strawberry               |
| 14. strawberries             |
| 15. tomato                   |
| 16. tomatoes                 |
| 17. cereal                   |
| 18. cereals                  |
| 19. "breakfast cereal"       |
| 20. grain                    |
| 21. grains                   |
| 22. "whole grain"            |
| 23. "whole grains"           |
| 24. rice                     |
| 25. bread                    |
| 26. nut                      |
| 27. seed                     |
| 28. peanut                   |
| 29. peanuts                  |
| 30. legumes                  |
| 31. soy                      |
| 32. soya                     |
| 33. chickpeas                |
| 34. chickpea                 |
| 35. bean                     |
| 36. beans                    |
| 37. lentil                   |
| 38. legume                   |
| 39. legumes                  |
| 40. fiber                    |
| 41. "dietary fiber"          |
| 42. "fruit fiber"            |
| 43. "vegetable fiber"        |
| 44. "legume fiber"           |
| 45. "cereal fiber"           |
| 46. fibre                    |
| 47. "dietary fibre"          |
| 48. "fruit fibre"            |
| 49. "vegetable fibre"        |
| 50. "cereal fibre"           |
| 51. "DASH diet"              |
| 52. diet                     |
| 53. foods                    |
| 54. "dietary patterns"       |
| 55. "dietary pattern"        |
| 56. "dietary score"          |
| 57. "diet score"             |

|                                                                                                                                                                                                                                                                                                                                                                                                                   |
|-------------------------------------------------------------------------------------------------------------------------------------------------------------------------------------------------------------------------------------------------------------------------------------------------------------------------------------------------------------------------------------------------------------------|
| 58. "diet index"                                                                                                                                                                                                                                                                                                                                                                                                  |
| 59. "food index"                                                                                                                                                                                                                                                                                                                                                                                                  |
| 60. "nutrient index"                                                                                                                                                                                                                                                                                                                                                                                              |
| 61. "Mediterranean diet"                                                                                                                                                                                                                                                                                                                                                                                          |
| 62. "vitamin C"                                                                                                                                                                                                                                                                                                                                                                                                   |
| 63. "ascorbic acid"                                                                                                                                                                                                                                                                                                                                                                                               |
| 64. "vitamin E"                                                                                                                                                                                                                                                                                                                                                                                                   |
| 65. carotenoids                                                                                                                                                                                                                                                                                                                                                                                                   |
| 66. carotenoid                                                                                                                                                                                                                                                                                                                                                                                                    |
| 67. flavonoid                                                                                                                                                                                                                                                                                                                                                                                                     |
| 68. flavonoids                                                                                                                                                                                                                                                                                                                                                                                                    |
| 69. (1 OR 2 OR 3 OR 4 OR 5 OR 6 OR 7 OR 8 OR 9 OR 10 OR 11 OR 12 OR 13 OR 14 OR 15 OR 16 OR 17 OR 18 OR 19 OR 20 OR 21 OR 22 OR 23 OR 24 OR 25 OR 26 OR 27 OR 28 OR 29 OR 30 OR 31 OR 32 OR 33 OR 34 OR 35 OR 36 OR 37 OR 38 OR 39 OR 40 OR 41 OR 42 OR 43 OR 44 OR 45 OR 46 OR 47 OR 48 OR 49 OR 50 OR 51 OR 52 OR 53 OR 54 OR 55 OR 56 OR 57 OR 58 OR 59 OR 60 OR 61 OR 62 OR 63 OR 64 OR 65 OR 66 OR 67 OR 68) |
| 70. "coronary heart disease"                                                                                                                                                                                                                                                                                                                                                                                      |
| 71. "heart disease"                                                                                                                                                                                                                                                                                                                                                                                               |
| 72. "ischemic heart disease"                                                                                                                                                                                                                                                                                                                                                                                      |
| 73. "ischaemic heart disease"                                                                                                                                                                                                                                                                                                                                                                                     |
| 74. CHD                                                                                                                                                                                                                                                                                                                                                                                                           |
| 75. "coronary artery disease"                                                                                                                                                                                                                                                                                                                                                                                     |
| 76. "myocardial infarction"                                                                                                                                                                                                                                                                                                                                                                                       |
| 77. stroke                                                                                                                                                                                                                                                                                                                                                                                                        |
| 78. "ischemic stroke"                                                                                                                                                                                                                                                                                                                                                                                             |
| 79. "haemorrhagic stroke"                                                                                                                                                                                                                                                                                                                                                                                         |
| 80. "cardiovascular disease"                                                                                                                                                                                                                                                                                                                                                                                      |
| 81. CVD                                                                                                                                                                                                                                                                                                                                                                                                           |
| 82. cancer                                                                                                                                                                                                                                                                                                                                                                                                        |
| 83. "total cancer"                                                                                                                                                                                                                                                                                                                                                                                                |
| 84. mortality                                                                                                                                                                                                                                                                                                                                                                                                     |
| 85. "all-cause mortality"                                                                                                                                                                                                                                                                                                                                                                                         |
| 86. "total mortality"                                                                                                                                                                                                                                                                                                                                                                                             |
| 87. survival                                                                                                                                                                                                                                                                                                                                                                                                      |
| 88. (70 OR 71 OR 72 OR 73 OR 74 OR 75 OR 76 OR 77 OR 78 OR 79 OR 80 OR 81 OR 82 OR 83 OR 84 OR 85 OR 86 OR 87)                                                                                                                                                                                                                                                                                                    |
| 89. "case-control"                                                                                                                                                                                                                                                                                                                                                                                                |
| 90. cohort                                                                                                                                                                                                                                                                                                                                                                                                        |
| 91. cohorts                                                                                                                                                                                                                                                                                                                                                                                                       |
| 92. prospective                                                                                                                                                                                                                                                                                                                                                                                                   |
| 93. longitudinal                                                                                                                                                                                                                                                                                                                                                                                                  |
| 94. retrospective                                                                                                                                                                                                                                                                                                                                                                                                 |
| 95. "follow-up"                                                                                                                                                                                                                                                                                                                                                                                                   |
| 96. "cross-sectional"                                                                                                                                                                                                                                                                                                                                                                                             |
| 97. "population-based"                                                                                                                                                                                                                                                                                                                                                                                            |
| 98. "relative risk"                                                                                                                                                                                                                                                                                                                                                                                               |
| 99. "odds ratio"                                                                                                                                                                                                                                                                                                                                                                                                  |
| 100 "hazard ratio"                                                                                                                                                                                                                                                                                                                                                                                                |
| 101 "incidence rate ratio"                                                                                                                                                                                                                                                                                                                                                                                        |
| 102 (89 OR 90 OR 91 OR 92 OR 93 OR 94 OR 95 OR 96 OR 97 OR 98 OR 99 OR 100 OR 101)                                                                                                                                                                                                                                                                                                                                |
| 103. 69 AND 88 AND 102                                                                                                                                                                                                                                                                                                                                                                                            |

## Supplementary Table 2. List of excluded studies and reason for exclusion

| Exclusion reason                                            | Reference number |
|-------------------------------------------------------------|------------------|
| Abstract only publication                                   | (1-3)            |
| Duplicates                                                  | (4-13)           |
| Ecological study                                            | (14)             |
| Letter                                                      | (15-17)          |
| Meta-analysis                                               | (18-29)          |
| No risk estimates                                           | (30;31)          |
| Not relevant outcome                                        | (32-34)          |
| Not usable result                                           | (35;36)          |
| Patient population (diabetes, heart disease, heart failure) | (37-39)          |
| Review                                                      | (40-53)          |
| Unspecific exposure (combined with fruits or legumes)       | (54-60)          |

### Reference List

1. Fernandez MA, Bes RM, Beunza JJ et al. Nut consumption and decreased risk of total mortality in the sun project. *Annals of Nutrition and Metabolism* 2013;63:1017.
2. Guasch-Ferre M, Bullo M, Martinez-Gonzalez M-A et al. Frequency of nut consumption and risk of total mortality in the predimed study. *Annals of Nutrition and Metabolism* 2013;62:17-8.
3. Djousse L, Petrone A, Gaziano J. Nut consumption is associated with a lower risk of death among us male physicians. *Circulation* 2014;129:25 (AP067).
4. Fraser GE, Lindsted KD, Beeson WL. Effect of risk factor values on lifetime risk of and age at first coronary event. The Adventist Health Study. *Am J Epidemiol* 1995;142:746-58.
5. Hu FB, Stampfer MJ, Manson JE et al. Frequent nut consumption and risk of coronary heart disease in women: prospective cohort study. *BMJ* 1998;317:1341-5.
6. Fraser GE. Nut consumption, lipids, and risk of a coronary event. *Asia Pac J Clin Nutr* 2000;9 Suppl 1:S28-S32.
7. Ellsworth JL, Kushi LH, Folsom AR. Frequent nut intake and risk of death from coronary heart disease and all causes in postmenopausal women: the Iowa Women's Health Study. *Nutr Metab Cardiovasc Dis* 2001;11:372-7.
8. He K, Merchant A, Rimm EB et al. Dietary fat intake and risk of stroke in male US healthcare professionals: 14 year prospective cohort study. *BMJ* 2003;327:777-82.
9. van den Brandt PA. The impact of a Mediterranean diet and healthy lifestyle on premature mortality in men and women. *Am J Clin Nutr* 2011;94:913-20.
10. Baer HJ, Glynn RJ, Hu FB et al. Risk factors for mortality in the nurses' health study: a competing risks analysis. *Am J Epidemiol* 2011;173:319-29.
11. Sluik D, Boeing H, Li K et al. Lifestyle factors and mortality risk in individuals with diabetes mellitus: are the associations different from those in individuals without diabetes? *Diabetologia* 2014;57:63-72.
12. Schroder H, Salas-Salvado J, Martinez-Gonzalez MA et al. Baseline adherence to the Mediterranean diet and major cardiovascular events: Prevencion con Dieta Mediterranea trial. *JAMA Intern Med* 2014;174:1690-2.

13. Kushi LH, Folsom AR, Prineas RJ, Mink PJ, Wu Y, Bostick RM. Dietary antioxidant vitamins and death from coronary heart disease in postmenopausal women. *N Engl J Med* 1996;334:1156-62.
14. Papandreou C, Tuomilehto H. Coronary heart disease mortality in relation to dietary, lifestyle and biochemical risk factors in the countries of the Seven Countries Study: a secondary dataset analysis. *Journal of human nutrition and dietetics : the official journal of the British Dietetic Association* 2014;27:168-75.
15. Kopel E, Kivity S, Sidi Y. Nut consumption and mortality [6]. *New England Journal of Medicine* 2014;370:881-2.
16. Temple NJ. Re. "Nut consumption and 5-y all-cause mortality in a Mediterranean cohort: The SUN project". *Nutrition* 2015;31:1299.
17. Fernandez-Montero A, Martinez-Gonzalez MA, Moreno-Galarraga L. Re. "Nut consumption and 5-y all-cause mortality in a Mediterranean cohort: The SUN project": Authors' response. *Nutrition* 2015;31:1299-300.
18. Mentz A, de KL, Shannon HS, Anand SS. A systematic review of the evidence supporting a causal link between dietary factors and coronary heart disease. *Arch Intern Med* 2009;169:659-69.
19. Luo C, Zhang Y, Ding Y et al. Nut consumption and risk of type 2 diabetes, cardiovascular disease, and all-cause mortality: a systematic review and meta-analysis. *Am J Clin Nutr* 2014;100:256-69.
20. Ma L, Wang F, Guo W, Yang H, Liu Y, Zhang W. Nut consumption and the risk of coronary artery disease: a dose-response meta-analysis of 13 prospective studies. *Thromb Res* 2014;134:790-4.
21. Weng Y-Q, Yao J, Guo M-L, Qin Q-J, Li P. Association between nut consumption and coronary heart disease: A meta-analysis. *Experimental and Clinical Cardiology* 2014;20:NA.
22. Zhou D, Yu H, He F et al. Nut consumption in relation to cardiovascular disease risk and type 2 diabetes: a systematic review and meta-analysis of prospective studies. *Am J Clin Nutr* 2014;100:270-7.
23. Afshin A, Micha R, Khatibzadeh S, Mozaffarian D. Consumption of nuts and legumes and risk of incident ischemic heart disease, stroke, and diabetes: a systematic review and meta-analysis. *Am J Clin Nutr* 2014;100:278-88.
24. Shi ZQ, Tang JJ, Wu H, Xie CY, He ZZ. Consumption of nuts and legumes and risk of stroke: a meta-analysis of prospective cohort studies. *Nutr Metab Cardiovasc Dis* 2014;24:1262-71.
25. Grosso G, Yang J, Marventano S, Micek A, Galvano F, Kales SN. Nut consumption on all-cause, cardiovascular, and cancer mortality risk: a systematic review and meta-analysis of epidemiologic studies. *Am J Clin Nutr* 2015;101:783-93.
26. Wu L, Wang Z, Zhu J, Murad AL, Prokop LJ, Murad MH. Nut consumption and risk of cancer and type 2 diabetes: a systematic review and meta-analysis. *Nutr Rev* 2015;73:409-25.
27. Zhang Z, Xu G, Wei Y, Zhu W, Liu X. Nut consumption and risk of stroke. *Eur J Epidemiol* 2015;30:189-96.

28. Weng YQ, Yao J, Guo ML, Qin QJ, Li P. Association between nut consumption and coronary heart disease: a meta-analysis. *Coron Artery Dis* 2016;27:227-32.
29. Mayhew AJ, de Souza RJ, Meyre D, Anand SS, Mente A. A systematic review and meta-analysis of nut consumption and incident risk of CVD and all-cause mortality. *Br J Nutr* 2016;115:212-25.
30. Trichopoulou A, Kouris-Blazos A, Vassilakou T et al. Diet and survival of elderly Greeks: a link to the past. *Am J Clin Nutr* 1995;61:1346S-50S.
31. Fraser GE, Shavlik DJ. Ten years of life is it a matter of choice? *Archives of Internal Medicine* 2001;161:1645-52.
32. Nettleton JA, Steffen LM, Loehr LR, Rosamond WD, Folsom AR. Incident heart failure is associated with lower whole-grain intake and greater high-fat dairy and egg intake in the Atherosclerosis Risk in Communities (ARIC) study. *J Am Diet Assoc* 2008;108:1881-7.
33. Djousse L, Rudich T, Gaziano JM. Nut consumption and risk of hypertension in US male physicians. *Clin Nutr* 2009;28:10-4.
34. Greco G, Egorova NN, Moskowitz AJ et al. A model for predicting the risk of carotid artery disease. *Ann Surg* 2013;257:1168-73.
35. Akbaraly TN, Ferrie JE, Berr C et al. Alternative Healthy Eating Index and mortality over 18 y of follow-up: results from the Whitehall II cohort. *Am J Clin Nutr* 2011;94:247-53.
36. Reedy J, Krebs-Smith SM, Miller PE et al. Higher diet quality is associated with decreased risk of all-cause, cardiovascular disease, and cancer mortality among older adults. *J Nutr* 2014;144:881-9.
37. Li TY, Brennan AM, Wedick NM, Mantzoros C, Rifai N, Hu FB. Regular consumption of nuts is associated with a lower risk of cardiovascular disease in women with type 2 diabetes. *J Nutr* 2009;139:1333-8.
38. Trichopoulou A, Bamia C, Trichopoulos D. Mediterranean diet and survival among patients with coronary heart disease in Greece. *Arch Intern Med* 2005;165:929-35.
39. Levitan EB, Lewis CE, Tinker LF et al. Mediterranean and DASH Diet Scores and Mortality in Women with Heart Failure: The Women's Health Initiative. *Circ Heart Fail* 2013;6:1116-23.
40. Sabate J. Does nut consumption protect against ischaemic heart disease? *Eur J Clin Nutr* 1993;47 Suppl 1:S71-S75.
41. Hu FB, Stampfer MJ. Nut consumption and risk of coronary heart disease: a review of epidemiologic evidence. *Curr Atheroscler Rep* 1999;1:204-9.
42. Fraser GE. Nut consumption, lipids, and risk of a coronary event. *Clin Cardiol* 1999;22:III11-III15.
43. Fraser GE. Diet as primordial prevention in Seventh-Day Adventists. *Prev Med* 1999;29:S18-S23.

44. Fraser GE. Associations between diet and cancer, ischemic heart disease, and all-cause mortality in non-Hispanic white California Seventh-day Adventists. *Am J Clin Nutr* 1999;70:532S-8S.
45. Sabate J. Nut consumption, vegetarian diets, ischemic heart disease risk, and all-cause mortality: evidence from epidemiologic studies. *Am J Clin Nutr* 1999;70:500S-3S.
46. Hu FB, Willett WC. Optimal diets for prevention of coronary heart disease. *JAMA* 2002;288:2569-78.
47. Feldman EB. The scientific evidence for a beneficial health relationship between walnuts and coronary heart disease. *J Nutr* 2002;132:1062S-101S.
48. Hu FB. Plant-based foods and prevention of cardiovascular disease: an overview. *Am J Clin Nutr* 2003;78:544S-51S.
49. Megias-Rangil I, Garcia-Lorda P, Torres-Moreno M, Bullo M, Salas-Salvado J. Nutrient content and health effects of nuts. [Spanish]. *Archivos latinoamericanos de nutricion* 2004;54:83-6.
50. Kelly JH, Jr., Sabate J. Nuts and coronary heart disease: an epidemiological perspective. *Br J Nutr* 2006;96 Suppl 2:S61-S67.
51. Sabate J, Ang Y. Nuts and health outcomes: new epidemiologic evidence. *Am J Clin Nutr* 2009;89:1643S-8S.
52. Ros E, Tapsell LC, Sabate J. Nuts and berries for heart health. *Current Atherosclerosis Reports* 2010;12:397-406.
53. Grosso G, Estruch R. Nut consumption and age-related disease. *Maturitas* 2016;84:11-6.
54. Knuops KT, Groot de LC, Fidanza F, berti-Fidanza A, Kromhout D, van Staveren WA. Comparison of three different dietary scores in relation to 10-year mortality in elderly European subjects: the HALE project. *Eur J Clin Nutr* 2006;60:746-55.
55. Benetou V, Trichopoulou A, Orfanos P et al. Conformity to traditional Mediterranean diet and cancer incidence: the Greek EPIC cohort. *Br J Cancer* 2008;99:191-5.
56. Boggs DA, Ban Y, Palmer JR, Rosenberg L. Higher diet quality is inversely associated with mortality in African-American women. *J Nutr* 2015;145:547-54.
57. Kouris-Blazos A, Gnardellis C, Wahlqvist ML, Trichopoulos D, Lukito W, Trichopoulou A. Are the advantages of the Mediterranean diet transferable to other populations? A cohort study in Melbourne, Australia. *Br J Nutr* 1999;82:57-61.
58. Key TJ, Thorogood M, Appleby PN, Burr ML. Dietary habits and mortality in 11,000 vegetarians and health conscious people: results of a 17 year follow up. *BMJ* 1996;313:775-9.
59. Dilis V, Katsoulis M, Laggiou P, Trichopoulos D, Naska A, Trichopoulou A. Mediterranean diet and CHD: the Greek European Prospective Investigation into Cancer and Nutrition cohort. *Br J Nutr* 2012;108:699-709.
60. Estruch R, Ros E, Salas-Salvado J et al. Primary prevention of cardiovascular disease with a Mediterranean diet. *N Engl J Med* 2013;368:1279-90.

Supplementary table 3. Nut consumption and coronary heart disease

| Author, publication year, country | Study name                  | Study period                           | Number of participants, gender, age, number of cases/deaths                                                                           | Dietary assessment                               | Exposure and subgroup                                                                  | Nut consumption frequency or amount                                                                           | Relative risks (95% confidence intervals)                                                                                                            | Adjustment for confounding factors                                                                                                                                                                                                                           |
|-----------------------------------|-----------------------------|----------------------------------------|---------------------------------------------------------------------------------------------------------------------------------------|--------------------------------------------------|----------------------------------------------------------------------------------------|---------------------------------------------------------------------------------------------------------------|------------------------------------------------------------------------------------------------------------------------------------------------------|--------------------------------------------------------------------------------------------------------------------------------------------------------------------------------------------------------------------------------------------------------------|
| Fraser, 1992, USA                 | Adventist Health Study      | 1976-1982, 6 years follow-up           | 31208 men and women, age $\geq 25$ years: 134 incident nonfatal MI<br>260 definite fatal myocardial infarction<br>463 coronary deaths | Validated FFQ, 65 food items                     | Nuts, incident nonfatal MI<br><br>Nuts, definite fatal MI<br><br>Nuts, coronary deaths | <1/wk<br>1-4/wk<br>$\geq 5$ /wk<br><br><1/wk<br>1-4/wk<br>$\geq 5$ /wk<br><br><1/wk<br>1-4/wk<br>$\geq 5$ /wk | 1.00<br>0.78 (0.51-1.18)<br>0.49 (0.28-0.85)<br><br>1.00<br>0.76 (0.56-1.04)<br>0.52 (0.36-0.76)<br><br>1.00<br>0.82 (0.65-1.04)<br>0.59 (0.45-0.78) | Age, sex, smoking, exercise, relative weight, high blood pressure, type of grains – whole wheat vs. white, beef                                                                                                                                              |
| Mann JJ, 1997, England            | The Oxford Vegetarian Study | 1980-1984 – 1995, 13.3 years follow-up | 10802 men and women, age 16-79 years: 64 IHD deaths                                                                                   | FFQ                                              | Nuts                                                                                   | <1/wk<br>1-4<br>$\geq 5$                                                                                      | 1.00<br>1.19 (0.68-2.10)<br>0.87 (0.45-1.68)                                                                                                         | Age, sex, smoking, social class                                                                                                                                                                                                                              |
| Albert CM et al, 2002, USA        | Physicians' Health Study    | 1982-NA, 17 years follow-up            | 21454 men, age 40-84 years: 566 CHD deaths<br>1037 nonfatal MIs                                                                       | FFQ, 20 food items (validated in other studies)  | Nuts, CHD death<br><br>Nuts, nonfatal MI                                               | <1/mo<br>1-3/mo<br>1/wk<br>$\geq 2$ /wk<br><br><1/mo<br>1-3/mo<br>1/wk<br>$\geq 2$ /wk                        | 1.00<br>0.89 (0.67-1.16)<br>0.90 (0.67-1.22)<br>0.70 (0.50-0.98)<br><br>1.00<br>1.22 (1.00-1.51)<br>1.20 (0.96-1.50)<br>1.04 (0.82-1.33)             | Age, aspirin and beta-carotene assignment, cardiovascular disease, cigarette smoking, alcohol intake, physical activity, BMI, DM, high cholesterol, hypertension, use of multivitamins, vitamin E, vitamin C, fish, red meat, fruit/vegetables, dairy intake |
| Blomhoff R et al, 2006, USA       | Iowa Women's Health Study   | 1986-2001, 15 years follow-up          | 31778 women, age 55-69 years: 948 CHD deaths                                                                                          | FFQ, 127 food items (validated in other studies) | Nuts and peanut butter                                                                 | 0.0/wk<br>0.5<br>1.5<br>7.0                                                                                   | 1.00<br>1.03 (0.84-1.26)<br>0.82 (0.68-0.98)<br>0.71 (0.55-0.91)                                                                                     | Age, energy intake, BMI, WHR, physical activity, HRT, multivitamin supplements, alcohol, whole grain, refined grain, red meat, fish and seafood, total fruits and vegetables                                                                                 |
| Bernstein AM et al, 2010, USA     | Nurses' Health Study        | 1980-2006, 26 years follow-up          | 84136 women, age 34-59 years: 2210 nonfatal MIs and 952 CHD deaths                                                                    | Validated FFQ                                    | Nuts                                                                                   | 0.0 serv/d<br>0.04<br>0.07<br>0.12                                                                            | 1.00<br>0.73 (0.65-0.82)<br>0.91 (0.82-1.00)<br>0.76 (0.67-0.84)                                                                                     | Age, time period, total energy, alcohol, trans fat, BMI, cigarette smoking status an cigarettes per day, menopausal status, HRT, parental history of MI <65                                                                                                  |



|                           |                                                  |                                      |                                                      |                                  |                                                                    |                                                                                            |                                                                                                                                                                                                                              |                                                                                                                                                                                                                                                                                                                         |
|---------------------------|--------------------------------------------------|--------------------------------------|------------------------------------------------------|----------------------------------|--------------------------------------------------------------------|--------------------------------------------------------------------------------------------|------------------------------------------------------------------------------------------------------------------------------------------------------------------------------------------------------------------------------|-------------------------------------------------------------------------------------------------------------------------------------------------------------------------------------------------------------------------------------------------------------------------------------------------------------------------|
|                           |                                                  |                                      |                                                      |                                  |                                                                    | 0.40<br>Per 1 serv/d                                                                       | 0.68 (0.60-0.76)<br>0.78 (0.66-0.93)                                                                                                                                                                                         | years age, multivitamin use, vitamin E supplement use, aspirin use, physical exercise                                                                                                                                                                                                                                   |
| Bao Y et al, 2013, USA    | Nurses' Health Study                             | 1980-2010, 30 years follow-up        | 76464 women, age 34-59 years: 2208 CHD deaths        | Validated FFQ, 61-116 food items | Nuts, heart disease<br><br>Peanuts, heart disease<br><br>Tree nuts | Never<br><1/wk<br>1<br>2-4<br>≥5<br>Never<br><1/wk<br>1<br>≥2<br>Never<br><1/wk<br>1<br>≥2 | 1.00<br>0.84 (0.76-0.94)<br>0.79 (0.68-0.90)<br>0.76 (0.65-0.88)<br>0.72 (0.55-0.94)<br>1.00<br>0.89 (0.79-1.00)<br>0.91 (0.75-1.11)<br>0.81 (0.65-1.01)<br>1.00<br>0.83 (0.74-0.93)<br>1.00 (0.82-1.23)<br>0.73 (0.56-0.96) | Age, race, BMI, physical activity, smoking, screening, multivitamin use, aspirin use, FH – DM, MI or cancer, history of DM, hypertension, or hypercholesterolemia, total energy, alcohol, red or processed meat, fruits, vegetables, menopausal status, HRT                                                             |
| Bao Y et al, 2013, USA    | Health Professionals Follow-up Study             | 1986-2010, 24 years follow-up        | 42498 men, age 45-70 years: 2698 CHD deaths          | Validated FFQ, 131 food items    | Nuts, heart disease<br><br>Peanuts, heart disease<br><br>Tree nuts | Never<br><1/wk<br>1<br>2-4<br>≥5<br>Never<br><1/wk<br>1<br>≥2<br>Never<br><1/wk<br>1<br>≥2 | 1.00<br>0.83 (0.74-0.94)<br>0.78 (0.69-0.88)<br>0.74 (0.66-0.84)<br>0.71 (0.61-0.83)<br>1.00<br>0.84 (0.76-0.93)<br>0.83 (0.73-0.94)<br>0.74 (0.66-0.84)<br>1.00<br>0.85 (0.77-0.93)<br>0.85 (0.74-0.97)<br>0.76 (0.67-0.87) | Age, race, BMI, physical activity, smoking, screening, multivitamin use, aspirin use, FH – DM, MI or cancer, history of DM, hypertension, or hypercholesterolemia, total energy, alcohol, red or processed meat, fruits, vegetables                                                                                     |
| Haring B et al, 2014, USA | Atherosclerosis Risk In Communities Study (ARIC) | 1987-1989 - 2010, 22 years follow-up | 12066 men and women, age 45-64 years: 1147 CHD cases | FFQ, 66 food items               | Nuts                                                               | 0.0 serv/d<br>0.1<br>0.2<br>0.4<br>1.0                                                     | 1.00<br>0.89 (0.75-1.06)<br>0.86 (0.71-1.05)<br>0.83 (0.68-1.01)<br>0.91 (0.74-1.12)                                                                                                                                         | Age, sex, race, study center, total energy intake, smoking, education, SBP, antihypertensive medication, HDL cholesterol, total cholesterol, use of lipid lowering medication, BMI, WHR, alcohol, sports-related physical activity, leisure-time physical activity, carbohydrate intake, fiber intake, magnesium intake |
| Hshieh TT et al,          | Physicians'                                      | 1999-2002                            | 20742 men, mean                                      | FFQ, 19                          | Nuts                                                               | <1 serv/mo                                                                                 | 1.00                                                                                                                                                                                                                         | Age, BMI, alcohol, smoking, exercise,                                                                                                                                                                                                                                                                                   |

|                                            |                                 |                                      |                                                                         |                                         |                                                                                                 |                                                                                                                                  |                                                                                                                                                                              |                                                                                                                                                                                                                                                                                                                                                       |
|--------------------------------------------|---------------------------------|--------------------------------------|-------------------------------------------------------------------------|-----------------------------------------|-------------------------------------------------------------------------------------------------|----------------------------------------------------------------------------------------------------------------------------------|------------------------------------------------------------------------------------------------------------------------------------------------------------------------------|-------------------------------------------------------------------------------------------------------------------------------------------------------------------------------------------------------------------------------------------------------------------------------------------------------------------------------------------------------|
| 2015, USA                                  | Health Study                    | – NA, 9.6 years follow-up            | age 66 years: 405 CAD deaths                                            | food items (validated in other cohorts) |                                                                                                 | 1-3<br>1 serv/wk<br>2-4<br>≥5                                                                                                    | 1.02 (0.80-1.30)<br>0.88 (0.66-1.19)<br>0.72 (0.50-1.04)<br>0.85 (0.56-1.28)                                                                                                 | calories, SFA, fruit and vegetables, red meat, prevalent DM, hypertension                                                                                                                                                                                                                                                                             |
| Luu HN et al, 2015, USA                    | Southern Community Cohort Study | 2002-2009-NA, 5.4 years follow-up    | 71764 men and women, age 40-79 years: 793 CHD deaths                    | FFQ, 89 food items                      | Total nuts and peanut butter, African Americans<br><br>Total nuts and peanut butter, Caucasians | <0.95 g/d<br>0.95-<3.08<br>3.08-<7.30<br>7.30-<18.45<br>≥18.45<br><0.95 g/d<br>0.95-<3.08<br>3.08-<7.30<br>7.30-<18.45<br>≥18.45 | 1.00<br>0.67 (0.51-0.88)<br>0.95 (0.72-1.25)<br>0.74 (0.55-0.98)<br>0.62 (0.45-0.85)<br>1.00<br>0.85 (0.59-1.24)<br>0.73 (0.50-1.06)<br>0.65 (0.44-0.97)<br>0.60 (0.39-0.92) | Age, sex, race, education, occupation, household income, marital status, smoking pack-years, alcohol, BMI, physical activity, vitamin supplement use, Charlson Comorbidity Index, metabolic conditions (hypertension, heart disease, DM, obesity, hypercholesterolemia), total energy, red meat, chicken and duck intake, seafood, vegetables, fruits |
| Luu HN et al, 2015, China                  | Shanghai Men's Health Study     | 2002-2006 - NA, 6.5 years follow-up  | 61123 men, age 40-74 years: 306 CHD deaths                              | Validated FFQ, 84 food items            | Peanuts                                                                                         | <0.14 g/d<br>0.14-<0.72<br>0.72-<1.45<br>1.45-<2.54<br>• 2.54                                                                    | 1.00<br>0.93 (0.60-1.44)<br>0.66 (0.44-0.97)<br>0.81 (0.59-1.10)<br>0.80 (0.58-1.11)                                                                                         | Age, race, education, occupation, household income, marital status, smoking pack-years, alcohol, BMI, physical activity, vitamin supplement use, Charlson Comorbidity Index, metabolic conditions (hypertension, heart disease, DM, obesity, dyslipidemia), total energy, red meat, chicken and duck intake, seafood, vegetables, fruits              |
| Luu HN et al, 2015, China                  | Shanghai Women's Health Study   | 1996-2000 – NA, 12.2 years follow-up | 73142 women, age 40-70 years: 325 CHD deaths                            | Validated FFQ, 87 food items            | Peanuts                                                                                         | <0.14 g/d<br>0.14-<0.72<br>0.72-<1.45<br>1.45-<2.54<br>≥2.54                                                                     | 1.00<br>0.91 (0.66-1.26)<br>0.83 (0.61-1.14)<br>0.70 (0.50-0.97)<br>0.58 (0.39-0.87)                                                                                         | Age, race, education, occupation, household income, marital status, smoking pack-years, alcohol, BMI, physical activity, vitamin supplement use, Charlson Comorbidity Index, metabolic conditions (hypertension, heart disease, DM, obesity, dyslipidemia), total energy, red meat, chicken and duck intake, seafood, vegetables, fruits              |
| van den Brandt PA et al, 2015, Netherlands | Netherlands Cohort Study        | 1986-1996, 10 years follow-up        | 3202 subcohort members, men and women, age 55-69 years: 1488 IHD deaths | Validated FFQ, 150 food items           | Total nuts, all<br><br>Peanuts                                                                  | 0 g/d<br>0.1-<5<br>5-<10<br>≥10<br>0 g/d                                                                                         | 1.00<br>0.90 (0.76-1.07)<br>0.67 (0.52-0.88)<br>0.83 (0.67-1.04)<br>1.00                                                                                                     | Age, sex, cigarette smoking, number of cigarettes per day, years of smoking, hypertension, DM, body height, BMI, non-occupational physical activity, highest level of education, alcohol,                                                                                                                                                             |

|                                   |                                             |                                         |                                                               |                               |               |                                     |                                              |                                                                                                                                                                                                                                                                                                                                                                                                                 |
|-----------------------------------|---------------------------------------------|-----------------------------------------|---------------------------------------------------------------|-------------------------------|---------------|-------------------------------------|----------------------------------------------|-----------------------------------------------------------------------------------------------------------------------------------------------------------------------------------------------------------------------------------------------------------------------------------------------------------------------------------------------------------------------------------------------------------------|
|                                   |                                             |                                         |                                                               |                               | Tree nuts     | 0.1-<5<br>≥5<br>0 g/d               | 0.86 (0.73-1.03)<br>0.79 (0.64-0.96)<br>1.00 | vegetables, fruits, energy, nutritional supplement use, women: HRT                                                                                                                                                                                                                                                                                                                                              |
|                                   |                                             |                                         |                                                               |                               | Peanut butter | 0.1-<5<br>≥5<br>0 g/d               | 0.88 (0.74-1.06)<br>1.03 (0.72-1.46)<br>1.00 |                                                                                                                                                                                                                                                                                                                                                                                                                 |
| Bonaccio M et al, 2015, Italy     | The Moli-sani Study                         | 2005-2010 – 2011, 4.3 years follow-up   | 19386 men and women, mean age 54.5 years: 39 CHD deaths       | Validated FFQ, 188 food items | Nuts          | Never<br>Ever                       | 1.00<br>0.74 (0.38-1.45)                     | Age, sex, education, smoking status, leisure-time physical activity, BMI, energy intake, Mediterranean diet score without nuts                                                                                                                                                                                                                                                                                  |
| Gopinath B et al, 2015, Australia | The Blue Mountains Eye Study                | 1992-1994 - 2007, 15 years follow-up    | 2893 men and women, age ≥49 years: 430 IHD deaths             | Validated FFQ, 145 food items | Nuts, all     | 0-0.50 g/d<br>0.90-4.55<br>4.90-100 | 1.00<br>0.77 (0.60-0.98)<br>0.95 (0.74-1.21) | Age, sex, qualifications, total diet score (including food groups – vegetables, fruit, cereals and breads, meat, fish, poultry, dairy, sodium, alcohol, sugar, extra foods and energy intake and physical activity level), BMI, current smoking status, alcohol, self-rated health, walking disability, hypertension, diabetes, doctor-diagnosed history of cancer, angina, stroke, acute myocardial infarction |
|                                   |                                             |                                         |                                                               |                               | Nuts, women   | 0-0.50 g/d<br>0.90-4.55<br>4.90-100 | 1.00<br>0.66 (0.45-0.97)<br>1.02 (0.70-1.49) |                                                                                                                                                                                                                                                                                                                                                                                                                 |
|                                   |                                             |                                         |                                                               |                               | Nuts, men     | 0-0.50 g/d<br>0.90-4.55<br>4.90-100 | 1.00<br>0.81 (0.59-1.11)<br>0.91 (0.66-1.25) |                                                                                                                                                                                                                                                                                                                                                                                                                 |
| Wang JB et al, 2016, China        | Linxian Nutrition Intervention Trial cohort | 1984-1991 - 2010, 19-26 years follow-up | 2445 men and women, age 40-69 years: 355 heart disease deaths | FFQ, 64 food items            | Nuts          | Per 3 times/mo                      | 0.89 (0.82-0.98)                             | Age, sex, commune, smoking, drinking, season, BMI                                                                                                                                                                                                                                                                                                                                                               |

BMI=body mass index, CHD=coronary heart disease, DM=diabetes mellitus, FFQ=food frequency questionnaire, FH=family history, HRT=hormone replacement therapy, IHD=ischemic heart disease, MI=myocardial infarction, NA=not available, SFA=saturated fatty acids, WHR=waist-to-hip ratio

Supplementary table 4. Nut consumption and stroke

| Author, publication year, country | Study name                | Study period                          | Number of participants, gender, age, number of cases/deaths | Dietary assessment                               | Exposure and subgroup                                                                                              | Nut consumption frequency or amount                                                                                                 | Relative risks (95% confidence intervals)                                                                                                                                                                                                                                                                                        | Adjustment for confounding factors                                                                                                                                                                                                                                                                                                          |
|-----------------------------------|---------------------------|---------------------------------------|-------------------------------------------------------------|--------------------------------------------------|--------------------------------------------------------------------------------------------------------------------|-------------------------------------------------------------------------------------------------------------------------------------|----------------------------------------------------------------------------------------------------------------------------------------------------------------------------------------------------------------------------------------------------------------------------------------------------------------------------------|---------------------------------------------------------------------------------------------------------------------------------------------------------------------------------------------------------------------------------------------------------------------------------------------------------------------------------------------|
| Yochum LA et al, 2000, USA        | Iowa Women's Health Study | 1986-1997, ~11.4 years follow-up      | 34492 women, age 55-69 years: 215 stroke deaths             | FFQ, 127 food items (validated in other cohorts) | Nuts and seeds                                                                                                     | 0 times/mo<br>1-2<br>3-4<br>>4                                                                                                      | 1.00<br>0.85 (0.61-1.18)<br>0.79 (0.50-1.24)<br>0.73 (0.41-1.29)                                                                                                                                                                                                                                                                 | Age, total energy intake, BMI, WHR, high blood pressure, DM, HRT, alcohol, education, marital status, pack-years of smoking, physical activity, cholesterol, SFA, fish, vitamin C, carotenoids, dietary fiber, whole grains                                                                                                                 |
| Djousse L et al, 2010, USA        | Physicians' Health Study  | 1982-2008, 21.1 years follow-up       | 21078 men and women, age 40.7-86.7 years: 1424 stroke cases | FFQ, 19 food items (validated in other cohorts)  | Nuts, total stroke<br><br>Nuts, ischemic stroke<br><br>Nuts, hemorrhagic stroke                                    | 0 times/wk<br><1<br>1<br>2-4<br>5-6<br>≥7<br>0 times/wk<br><1<br>1<br>2-4<br>5-6<br>≥7<br>0 times/wk<br><1<br>1<br>2-4<br>5-6<br>≥7 | 1.00<br>0.91 (0.79-1.05)<br>0.95 (0.81-1.11)<br>0.90 (0.75-1.08)<br>1.11 (0.85-1.46)<br>1.07 (0.79-1.46)<br>1.00<br>0.86 (0.74-1.01)<br>0.94 (0.79-1.11)<br>0.97 (0.80-1.18)<br>1.06 (0.79-1.43)<br>0.93 (0.65-1.34)<br>1.00<br>1.13 (0.78-1.62)<br>1.05 (0.70-1.58)<br>0.49 (0.27-0.89)<br>1.50 (0.79-2.84)<br>1.84 (0.95-3.57) | Age, aspirin assignment, BMI, alcohol, smoking, fruit and vegetables, regular exercise, breakfast cereal, red meat, fish, dairy, hypertension, DM, atrial fibrillation, coronary heart disease                                                                                                                                              |
| Yaemsiri S et al, 2012, USA       | Women's Health Initiative | 1994-1998 – 2005, 7.6 years follow-up | 87025 women, age 50-79 years: 1049 ischemic stroke cases    | Validated FFQ, 122 food items                    | Nuts, total ischemic stroke<br>Nuts, atherothrombotic stroke<br>Nuts, lacunar stroke<br>Nuts, cardioembolic stroke | Per 1 serv/d<br>Per 1 serv/d<br>Per 1 serv/d<br>Per 1 serv/d                                                                        | 0.85 (0.64-1.14)<br>0.89 (0.35-2.24)<br>0.79 (0.44-1.42)<br>0.78 (0.41-1.45)                                                                                                                                                                                                                                                     | Age, race, education, family income, smoking status and years as regular smoker, HRT use, total metabolic equivalent task hours per week, alcohol intake, history of coronary heart disease, atrial fibrillation, DM, aspirin use, antihypertensive medication, cholesterol-lowering medication, BMI, systolic blood pressure, total energy |

|                               |                                                             |                                                                |                                                                                                                                                                                   |                                                                   |                                                                               |                                                                                                                                                                              |                                                                                                                                                                                                                      |                                                                                                                                                                                                                                                                                                                                                                                                     |
|-------------------------------|-------------------------------------------------------------|----------------------------------------------------------------|-----------------------------------------------------------------------------------------------------------------------------------------------------------------------------------|-------------------------------------------------------------------|-------------------------------------------------------------------------------|------------------------------------------------------------------------------------------------------------------------------------------------------------------------------|----------------------------------------------------------------------------------------------------------------------------------------------------------------------------------------------------------------------|-----------------------------------------------------------------------------------------------------------------------------------------------------------------------------------------------------------------------------------------------------------------------------------------------------------------------------------------------------------------------------------------------------|
| Bernstein AM et al, 2012, USA | Health Professionals Follow-up Study                        | 1986-2008, 22 years follow-up                                  | 43150 men, age 40-75 years: 1397 stroke cases                                                                                                                                     | Validated FFQ, 131 food items                                     | Nuts                                                                          | 0.00 serv/d<br>0.07<br>0.14<br>0.25<br>0.60<br>Per 1 serv/d                                                                                                                  | 1.00<br>0.94 (0.79-1.12)<br>0.95 (0.80-1.13)<br>1.01 (0.86-1.20)<br>0.92 (0.77-1.09)<br>0.89 (0.68-1.16)                                                                                                             | Age, time period, BMI, cigarette smoking status and cigarettes per day, physical exercise, parental history of MI <60 years, multivitamin use, vitamin E supplement use, aspirin use, total energy, cereal fiber, alcohol, transfat, fruit and vegetables, legumes, eggs, low-fat dairy, high-fat dairy, fish, poultry, unprocessed red meat, processed red meat                                    |
| Bernstein AM et al, 2012, USA | Nurses' Health Study                                        | 1980-2006, 26 years follow-up                                  | 84010 women, age 34-59 years: 2633 stroke cases                                                                                                                                   | Validated FFQ, 61/131 food items                                  | Nuts                                                                          | 0.00 serv/d<br>0.04<br>0.07<br>0.12<br>0.34<br>Per 1 serv/d                                                                                                                  | 1.00<br>0.94 (0.83-1.06)<br>0.91 (0.80-1.04)<br>0.97 (0.85-1.10)<br>0.86 (0.75-0.98)<br>0.71 (0.51-1.00)                                                                                                             | Age, time period, BMI, cigarette smoking status and cigarettes per day, physical exercise, parental history of MI <60 years, multivitamin use, vitamin E supplement use, aspirin use, total energy, cereal fiber, alcohol, transfat, fruit and vegetables, legumes, eggs, low-fat dairy, high-fat dairy, fish, poultry, unprocessed red meat, processed red meat, menopausal status, HRT use        |
| Bernstein AM et al, 2012, USA | Health Professionals Follow-up Study & Nurses' Health Study | 1986-2008, 22 years follow-up<br>1980-2006, 26 years follow-up | 43150 men, age 40-75 years: 218 hemorrhagic stroke cases<br>829 ischemic stroke cases<br>84010 women, age 34-59 years: 475 hemorrhagic stroke cases<br>1383 ischemic stroke cases | Validated FFQ, 131 food items<br>Validated FFQ, 61/131 food items | Nuts (men/women), hemorrhagic stroke<br><br>Nuts (men/women), ischemic stroke | 0.00/0.00 serv/d<br>0.07/0.04<br>0.14/0.07<br>0.25/0.12<br>0.60/0.34<br>Per 1 serv/d<br>0.00/0.00 serv/d<br>0.07/0.04<br>0.14/0.07<br>0.25/0.12<br>0.60/0.34<br>Per 1 serv/d | 1.00<br>1.04 (0.76-1.43)<br>0.81 (0.57-1.13)<br>0.86 (0.62-1.20)<br>0.83 (0.69-1.16)<br>0.66 (0.34-1.26)<br>1.00<br>0.97 (0.84-1.11)<br>1.00 (0.86-1.15)<br>1.03 (0.89-1.18)<br>0.97 (0.84-1.12)<br>0.93 (0.70-1.22) | Age, time period, BMI, cigarette smoking status and cigarettes per day, physical exercise, parental history of MI <60 years, multivitamin use, vitamin E supplement use, aspirin use, total energy, cereal fiber, alcohol, transfat, fruit and vegetables, legumes, eggs, low-fat dairy, high-fat dairy, fish, poultry, unprocessed red meat, processed red meat, women: menopausal status, HRT use |
| Bao Y et al, 2013, USA        | Nurses' Health Study                                        | 1980-2010, 30 years follow-up                                  | 76464 women, age 34-59 years: 878 stroke deaths                                                                                                                                   | Validated FFQ, 61-116 food items                                  | Nuts<br><br>Peanuts                                                           | Never<br><1/wk<br>1<br>2-4<br>≥5<br>Never                                                                                                                                    | 1.00<br>0.88 (0.74-1.05)<br>0.90 (0.72-1.13)<br>0.98 (0.77-1.24)<br>1.05 (0.73-1.52)<br>1.00                                                                                                                         | Age, race, BMI, physical activity, smoking, screening, multivitamin use, aspirin use, FH – DM, MI or cancer, history of DM, hypertension, or hypercholesterolemia, total energy, alcohol, red or processed meat, fruits,                                                                                                                                                                            |

|                                    |                                                                              |                                       |                                                                 |                                  |                                                                                                           |                                                                                                                                  |                                                                                                                                                                                                                                                                              |                                                                                                                                                                                                                                                                  |
|------------------------------------|------------------------------------------------------------------------------|---------------------------------------|-----------------------------------------------------------------|----------------------------------|-----------------------------------------------------------------------------------------------------------|----------------------------------------------------------------------------------------------------------------------------------|------------------------------------------------------------------------------------------------------------------------------------------------------------------------------------------------------------------------------------------------------------------------------|------------------------------------------------------------------------------------------------------------------------------------------------------------------------------------------------------------------------------------------------------------------|
|                                    |                                                                              |                                       |                                                                 |                                  | Tree nuts                                                                                                 | <1/wk<br>1<br>≥2<br>Never<br><1/wk<br>1<br>≥2                                                                                    | 0.92 (0.76-1.10)<br>0.94 (0.70-1.26)<br>1.18 (0.88-1.59)<br>1.00<br>0.87 (0.73-1.04)<br>0.84 (0.60-1.18)<br>1.09 (0.77-1.53)                                                                                                                                                 | vegetables, menopausal status, HRT                                                                                                                                                                                                                               |
| Bao Y et al, 2013, USA             | Health Professional's Follow-up Study                                        | 1986-2010, 24 years follow-up         | 42498 men, age 45-70 years: 687 stroke deaths                   | Validated FFQ, 131 food items    | Nuts<br><br>Peanuts<br><br>Tree nuts                                                                      | Never<br><1/wk<br>1<br>2-4<br>≥5<br>Never<br><1/wk<br>1<br>≥2<br>Never<br><1/wk<br>1<br>≥2                                       | 1.00<br>0.74 (0.58-0.94)<br>0.97 (0.77-1.24)<br>0.88 (0.69-1.12)<br>0.78 (0.58-1.06)<br>1.00<br>0.89 (0.73-1.08)<br>0.82 (0.64-1.07)<br>0.81 (0.65-1.03)<br>1.00<br>1.02 (0.85-1.23)<br>1.11 (0.86-1.42)<br>0.90 (0.69-1.17)                                                 | Age, race, BMI, physical activity, smoking, screening, multivitamin use, aspirin use, FH – DM, MI or cancer, history of DM, hypertension, or hypercholesterolemia, total energy, alcohol, red or processed meat, fruits, vegetables                              |
| Di Giuseppe R et al, 2014, Germany | European Prospective Investigation into Cancer and Nutrition – Potsdam Study | 1994-1998 – 2008, 8.3 years follow-up | 26285 men and women, mean age 49.2/52.5 years: 288 stroke cases | Validated FFQ, 146 food items    | Nuts, total stroke<br><br>Nuts, ischemic stroke<br><br>Nuts, hemorrhagic stroke<br><br>Nuts, fatal stroke | 0 g/d<br>0.82<br>4.11<br>14.2<br>0 g/d<br>0.82<br>4.11<br>14.2<br>0 g/d<br>0.82<br>4.11<br>14.2<br>0 g/d<br>0.82<br>4.11<br>14.2 | 1.56 (1.17-2.08)<br>1.00<br>1.06 (0.75-1.52)<br>1.37 (0.92-2.05)<br>1.50 (1.09-2.07)<br>1.00<br>1.16 (0.79-1.72)<br>1.62 (1.05-2.49)<br>1.48 (1.09-2.01)<br>1.00<br>1.04 (0.71-1.53)<br>1.47 (0.97-2.24)<br>2.18 (1.00-4.78)<br>1.00<br>1.22 (0.47-3.18)<br>0.67 (0.15-2.97) | Age, sex, BMI, waist circumference, hypertension, hyperlipidemia, DM, smoking status, education, sport activity, alcohol, red meat, whole-grain breads, fruit, vegetables, fish, cakes and cookies, confectionary, fried potatoes, other beverages, total energy |
| Hshieh TT et al, 2015, USA         | Physicians' Health Study                                                     | 1999-2002 – NA, 9.6 years             | 20742 men, mean age 66 years: 142 stroke deaths                 | FFQ, 19 food items (validated in | Nuts                                                                                                      | <1 serv/mo<br>1-3<br>1 serv/wk                                                                                                   | 1.00<br>0.91 (0.60-1.39)<br>0.82 (0.50-1.36)                                                                                                                                                                                                                                 | Age, BMI, alcohol, smoking, exercise, calories, SFA, fruit and vegetables, red meat, prevalent DM, hypertension                                                                                                                                                  |

|                           |                                 | follow-up                            |                                                                          | other cohorts)               |                                                                     | 2-4<br>≥5                                                      | 0.84 (0.48-1.47)<br>0.64 (0.32-1.30)                                                 |                                                                                                                                                                                                                                                                                                                                                       |
|---------------------------|---------------------------------|--------------------------------------|--------------------------------------------------------------------------|------------------------------|---------------------------------------------------------------------|----------------------------------------------------------------|--------------------------------------------------------------------------------------|-------------------------------------------------------------------------------------------------------------------------------------------------------------------------------------------------------------------------------------------------------------------------------------------------------------------------------------------------------|
| Luu HN et al, 2015, USA   | Southern Community Cohort Study | 2002-2009 - NA, 5.4 years follow-up  | 71764 men and women, age 40-79 years: 217 stroke deaths                  | FFQ, 89 food items           | Total nuts and peanut butter, ischemic stroke, African Americans    | <0.95 g/d<br>0.95-<3.08<br>3.08-<7.30<br>7.30-<18.45<br>≥18.45 | 1.00<br>0.89 (0.49-1.62)<br>0.72 (0.35-1.46)<br>0.85 (0.44-1.64)<br>0.89 (0.45-1.74) | Age, sex, race, education, occupation, household income, marital status, smoking pack-years, alcohol, BMI, physical activity, vitamin supplement use, Charlson Comorbidity Index, metabolic conditions (hypertension, heart disease, DM, obesity, hypercholesterolemia), total energy, red meat, chicken and duck intake, seafood, vegetables, fruits |
|                           |                                 |                                      |                                                                          |                              | Total nuts and peanut butter, ischemic stroke, Caucasians           | <0.95 g/d<br>0.95-<3.08<br>3.08-<7.30<br>7.30-<18.45<br>≥18.45 | 1.00<br>0.39 (0.10-1.55)<br>0.38 (0.10-1.46)<br>0.43 (0.12-1.54)<br>0.47 (0.12-1.76) |                                                                                                                                                                                                                                                                                                                                                       |
|                           |                                 |                                      |                                                                          |                              | Total nuts and peanut butter, hemorrhagic stroke, African Americans | <0.95 g/d<br>0.95-<3.08<br>3.08-<7.30<br>7.30-<18.45<br>≥18.45 | 1.00<br>0.81 (0.37-1.75)<br>0.93 (0.43-2.02)<br>0.80 (0.36-1.74)<br>1.37 (0.67-2.80) |                                                                                                                                                                                                                                                                                                                                                       |
|                           |                                 |                                      |                                                                          |                              | Total nuts and peanut butter, hemorrhagic stroke, Caucasian         | <0.95 g/d<br>0.95-<3.08<br>3.08-<7.30<br>7.30-<18.45<br>≥18.45 | 1.00<br>1.44 (0.36-5.68)<br>0.29 (0.05-1.72)<br>0.74 (0.17-3.23)<br>0.62 (0.12-3.26) |                                                                                                                                                                                                                                                                                                                                                       |
| Luu HN et al, 2015, China | Shanghai Men's Health Study     | 2002-2006 - NA, 6.5 years follow-up  | 61123 men, age 40-74 years: 234/245 ischemic/hemorrhagic stroke deaths   | Validated FFQ, 84 food items | Peanuts, ischemic stroke                                            | <0.14 g/d<br>0.14-<0.72<br>0.72-<1.45<br>1.45-<2.54<br>≥2.54   | 1.00<br>1.22 (0.79-1.90)<br>0.72 (0.47-1.10)<br>0.58 (0.39-0.86)<br>0.79 (0.54-1.14) | Age, race, education, occupation, household income, marital status, smoking pack-years, alcohol, BMI, physical activity, vitamin supplement use, Charlson Comorbidity Index, metabolic conditions (hypertension, heart disease, DM, obesity, dyslipidemia), total energy, red meat, chicken and duck intake, seafood, vegetables, fruits              |
|                           |                                 |                                      |                                                                          |                              | Peanuts, hemorrhagic stroke                                         | <0.14 g/d<br>0.14-<0.72<br>0.72-<1.45<br>1.45-<2.54<br>≥2.54   | 1.00<br>1.38 (0.90-2.12)<br>0.85 (0.56-1.27)<br>0.74 (0.51-1.07)<br>0.80 (0.55-1.16) |                                                                                                                                                                                                                                                                                                                                                       |
| Luu HN et al, 2015, China | Shanghai Women's Health Study   | 1996-2000 - NA, 12.2 years follow-up | 73142 women, age 40-70 years: 354/352 ischemic/hemorrhagic stroke deaths | Validated FFQ, 87 food items | Peanuts, ischemic stroke                                            | <0.14 g/d<br>0.14-<0.72<br>0.72-<1.45<br>1.45-<2.54<br>≥2.54   | 1.00<br>0.80 (0.58-1.10)<br>0.84 (0.62-1.14)<br>0.71 (0.52-0.97)<br>0.72 (0.51-1.03) | Age, race, education, occupation, household income, marital status, smoking pack-years, alcohol, BMI, physical activity, vitamin supplement use, Charlson Comorbidity Index, metabolic conditions (hypertension, heart disease, DM, obesity,                                                                                                          |
|                           |                                 |                                      |                                                                          |                              | Peanuts, hemorrhagic stroke                                         | <0.14 g/d<br>0.14-<0.72                                        | 1.00<br>0.74 (0.54-1.01)                                                             |                                                                                                                                                                                                                                                                                                                                                       |

|                                            |                                                  |                                        |                                                                           |                               |                                                                      |                                                                                                                   |                                                                                                                                                                                                                  |                                                                                                                                                                                                                                                                                                                                  |
|--------------------------------------------|--------------------------------------------------|----------------------------------------|---------------------------------------------------------------------------|-------------------------------|----------------------------------------------------------------------|-------------------------------------------------------------------------------------------------------------------|------------------------------------------------------------------------------------------------------------------------------------------------------------------------------------------------------------------|----------------------------------------------------------------------------------------------------------------------------------------------------------------------------------------------------------------------------------------------------------------------------------------------------------------------------------|
|                                            |                                                  |                                        |                                                                           |                               |                                                                      | 0.72-<1.45<br>1.45-<2.54<br>≥2.54                                                                                 | 0.63 (0.44-0.86)<br>0.66 (0.49-0.91)<br>0.77 (0.55-1.07)                                                                                                                                                         | dyslipidemia), total energy, red meat, chicken and duck intake, seafood, vegetables, fruits                                                                                                                                                                                                                                      |
| van den Brandt PA et al, 2015, Netherlands | Netherlands Cohort Study                         | 1986-1996, 10 years follow-up          | 3202 subcohort members, men and women, age 55-69 years: 565 stroke deaths | Validated FFQ, 150 food items | Total nuts, all<br><br>Peanuts<br><br>Tree nuts<br><br>Peanut butter | 0 g/d<br>0.1-<5<br>5-<10<br>≥10<br>0 g/d<br>0.1-<5<br>≥5<br>0 g/d<br>0.1-<5<br>≥5<br>0 g/d<br>0.1-<5<br>≥5        | 1.00<br>0.80 (0.63-1.01)<br>0.68 (0.48-0.97)<br>0.76 (0.56-1.02)<br>1.00<br>0.79 (0.62-0.99)<br>0.71 (0.54-0.94)<br>1.00<br>0.90 (0.70-1.15)<br>0.74 (0.44-1.24)<br>1.00<br>0.84 (0.64-1.11)<br>0.86 (0.60-1.23) | Age, sex, cigarette smoking, number of cigarettes per day, years of smoking, hypertension, DM, body height, BMI, non-occupational physical activity, highest level of education, alcohol, vegetables, fruits, energy, nutritional supplement use, women: HRT                                                                     |
| Haring B et al, 2015, USA                  | Atherosclerosis Risk in Communities Study (ARIC) | 1987-1989 - 2006, 22.7 years follow-up | 11601 men and women, age 45-64 years: 699 stroke cases                    | FFQ, 66 food items            | Nuts and peanut butter                                               | 0.00 serv/d<br>0.07<br>0.21<br>0.43<br>1.00                                                                       | 1.00<br>0.83 (0.65-1.05)<br>1.03 (0.81-1.32)<br>1.04 (0.81-1.33)<br>1.00 (0.77-1.31)                                                                                                                             | Age, sex, race, study center, total energy intake, smoking, cigarette years, education, SBP, use of antihypertensive medication, HDL-cholesterol, total cholesterol, use of lipid lowering medication, BMI, WHR, alcohol, sports-related physical activity, leisure-time physical activity, carbohydrates, fiber, fat, magnesium |
| Bonaccio M et al, 2015, Italy              | The Moli-sani Study                              | 2005-2010 – 2011, 4.3 years follow-up  | 19386 men and women, mean age 54.5 years: 19 stroke deaths                | Validated FFQ, 188 food items | Nuts                                                                 | Never<br>Ever                                                                                                     | 1.00<br>0.98 (0.36-2.66)                                                                                                                                                                                         | Age, sex, education, smoking status, leisure-time physical activity, BMI, energy intake, Mediterranean diet score without nuts                                                                                                                                                                                                   |
| Gopinath B et al, 2015, Australia          | The Blue Mountains Eye Study                     | 1992-1994 - 2007, 15 years follow-up   | 2893 men and women, age ≥49 years: 430 stroke deaths                      | Validated FFQ, 145 food items | Nuts, all<br><br>Nuts, women<br><br>Nuts, men                        | 0-0.50 g/d<br>0.90-4.55<br>4.90-100<br>0-0.50 g/d<br>0.90-4.55<br>4.90-100<br>0-0.50 g/d<br>0.90-4.55<br>4.90-100 | 1.00<br>0.70 (0.47-1.02)<br>0.88 (0.60-1.29)<br>1.00<br>0.52 (0.30-0.88)<br>0.67 (0.40-1.14)<br>1.00<br>0.86 (0.46-1.59)<br>1.30 (0.75-2.28)                                                                     | Age, sex, qualifications, total diet score, BMI, current smoking status, alcohol, self-rated health, walking disability, hypertension, diabetes, doctor-diagnosed history of cancer, angina, stroke, acute myocardial infarction                                                                                                 |



|                            |                                             |                                         |                                                        |                    |      |                |                  |                                                   |
|----------------------------|---------------------------------------------|-----------------------------------------|--------------------------------------------------------|--------------------|------|----------------|------------------|---------------------------------------------------|
| Wang JB et al, 2016, China | Linxian Nutrition Intervention Trial cohort | 1984-1991 - 2010, 19-26 years follow-up | 2445 men and women, age 40-69 years: 452 stroke deaths | FFQ, 64 food items | Nuts | Per 3 times/mo | 0.99 (0.93-1.05) | Age, sex, commune, smoking, drinking, season, BMI |
|----------------------------|---------------------------------------------|-----------------------------------------|--------------------------------------------------------|--------------------|------|----------------|------------------|---------------------------------------------------|

BMI=body mass index, DM=diabetes mellitus, FFQ=food frequency questionnaire, FH=family history, HRT=hormone replacement therapy, MI=myocardial infarction, NA=not available, SFA=saturated fatty acids, WHR=waist-to-hip ratio

Supplementary table 5. Nut consumption and cardiovascular disease

| Author, publication year, country  | Study name                                                                  | Study period                         | Number of participants, gender, age, number of cases/deaths | Dietary assessment                               | Exposure and subgroup  | Nut consumption frequency or amount                          | Relative risks (95% confidence intervals)                                            | Adjustment for confounding factors                                                                                                                                                                                                                          |
|------------------------------------|-----------------------------------------------------------------------------|--------------------------------------|-------------------------------------------------------------|--------------------------------------------------|------------------------|--------------------------------------------------------------|--------------------------------------------------------------------------------------|-------------------------------------------------------------------------------------------------------------------------------------------------------------------------------------------------------------------------------------------------------------|
| Blomhoff R et al, 2006, USA        | Iowa Women's Health Study                                                   | 1986-2001, 15 years follow-up        | 31778 women, age 55-69 years: 1675 CVD deaths               | FFQ, 127 food items (validated in other studies) | Nuts and peanut butter | 0.0/wk<br>0.5<br>1.5<br>7.0                                  | 1.00<br>1.00 (0.86-1.17)<br>0.84 (0.73-0.96)<br>0.72 (0.60-0.88)                     | Age, energy intake, BMI, WHR, physical activity, HRT, multivitamin supplements, alcohol, whole grain, refined grain, red meat, fish and seafood, total fruits and vegetables                                                                                |
| Fitzgerald KC et al, 2012, USA     | Women's Health Study                                                        | 1992-1994 - NA, 14.6 years follow-up | 34827 women, age ≥45 years: 1094 CVD cases                  | Validated FFQ, 133 food items                    | Nuts                   | <0.13 serv/d<br>0.13-0.20<br>0.21-0.34<br>0.35-0.57<br>≥0.58 | 1.00<br>0.93 (0.75-1.15)<br>0.99 (0.83-1.17)<br>0.94 (0.79-1.13)<br>1.02 (0.85-1.23) | Age, randomization status, smoking, postmenopausal status, HRT, alcohol intake, energy, physical activity, cigarettes per day, highest education level                                                                                                      |
| Von Ruesten A et al, 2013, Germany | European Prospective Investigation into Cancer and Nutrition– Potsdam study | 1994/1998– NA, 8 years follow-up     | 23,531 men and women, age 35-65 years: 363 CVD cases        | Validated FFQ, 148 food items                    | Nuts                   | Per 5 g/d                                                    | 1.00 (0.92-1.08)                                                                     | Age, sex, smoking status, pack-years of smoking, alcohol, leisure-time physical activity, BMI, WHR, prevalent hypertension, high blood lipid levels, education, vitamin supplementation, total energy, non-consumption of the food group, other food groups |
| Bao Y et al, 2013, USA             | Nurses' Health Study                                                        | 1980-2010, 30 years follow-up        | 76464 women, age 34-59 years: 3086 CVD deaths               | Validated FFQ, 61-116 food items                 | Nuts                   | Never<br><1/wk<br>1<br>2-4<br>≥5                             | 1.00<br>0.85 (0.78-0.93)<br>0.82 (0.72-0.92)<br>0.82 (0.72-0.93)<br>0.82 (0.66-1.01) | Age, race, BMI, physical activity, smoking, screening, multivitamin use, aspirin use, FH – DM, MI or cancer, history of DM, hypertension, or hypercholesterolemia, total energy, alcohol, red or processed meat, fruits, vegetables, menopausal status, HRT |
| Bao Y et al, 2013, USA             | Health Professional's Follow-up Study                                       | 1986-2010, 24 years follow-up        | 42498 men, age 45-70 years: 3385 CVD deaths                 | Validated FFQ, 131 food items                    | Nuts                   | Never<br><1/wk<br>1<br>2-4<br>≥5                             | 1.00<br>0.82 (0.74-0.91)<br>0.83 (0.75-0.93)<br>0.77 (0.69-0.86)<br>0.73 (0.64-0.83) | Age, race, BMI, physical activity, smoking, screening, multivitamin use, aspirin use, FH – DM, MI or cancer, history of DM, hypertension, or hypercholesterolemia, total energy, alcohol, red or processed meat, fruits, vegetables                         |

|                                   |                                      |                                     |                                                       |                                                 |                                                                                                 |                                                                                                                                  |                                                                                                                                                                              |                                                                                                                                                                                                                                                                                                                                                       |
|-----------------------------------|--------------------------------------|-------------------------------------|-------------------------------------------------------|-------------------------------------------------|-------------------------------------------------------------------------------------------------|----------------------------------------------------------------------------------------------------------------------------------|------------------------------------------------------------------------------------------------------------------------------------------------------------------------------|-------------------------------------------------------------------------------------------------------------------------------------------------------------------------------------------------------------------------------------------------------------------------------------------------------------------------------------------------------|
| Guasch-Ferre M et al, 2013, Spain | PREDIMED Study                       | NA-NA, 4.8 years follow-up          | 7216 men and women, age 55-80 years: 81 CVD deaths    | Validated FFQ, 137 food items                   | Nuts<br><br>Walnuts<br><br>Other nuts (excluding walnuts)                                       | Never<br>1-3 serv/wk<br>>3<br>Never<br>1-3 serv/wk<br>>3<br>Never<br>1-3 serv/wk<br>>3                                           | 1.00<br>0.42 (0.24-0.74)<br>0.45 (0.25-0.81)<br>1.00<br>0.41 (0.23-0.73)<br>0.53 (0.29-0.98)<br>1.00<br>0.74 (0.45-1.23)<br>0.42 (0.20-0.89)                                 | Age, sex, and intervention group, BMI, smoking status, education, leisure time physical activity, DM, hypercholesterolemia, oral antidiabetic medication, antihypertensive medication, use of statins, total energy, vegetables, fruits, red meat, eggs, fish, alcohol, Mediterranean diet adherence                                                  |
| Chiuye SE et al, 2014, USA        | Nurses' Health Study                 | 1986-2010, 24 years follow-up       | 40680 women, age 40-65 years: 2525 CVD events         | Validated FFQ, 131 food items                   | Nuts                                                                                            | 0 serv/wk<br>0.1-1<br>>1                                                                                                         | 1.00<br>0.89 (0.80-0.99)<br>0.80 (0.67-0.95)                                                                                                                                 | Age, smoking status, BMI, alcohol, exercise, fruits, vegetables, sugar-sweetened beverages, red and processed meats, cereal fiber                                                                                                                                                                                                                     |
| Chiuye SE et al, 2014, USA        | Health Professionals Follow-up Study | 1986-2010, 24 years follow-up       | 23026 men, age 40-75 years: 2375 CVD events           | Validated FFQ, 131 food items                   | Nuts                                                                                            | 0 serv/wk<br>0.1-1<br>>1                                                                                                         | 1.00<br>1.06 (0.94-1.20)<br>0.88 (0.74-1.04)                                                                                                                                 | Age, smoking status, BMI, alcohol, exercise, fruits, vegetables, sugar-sweetened beverages, red and processed meats, cereal fiber                                                                                                                                                                                                                     |
| Hshieh TT et al, 2015, USA        | Physicians' Health Study             | 1999-2002 – NA, 9.6 years follow-up | 20742 men, mean age 66 years: 760 CVD deaths          | FFQ, 19 food items (validated in other cohorts) | Nuts                                                                                            | <1 serv/mo<br>1-3<br>1 serv/wk<br>2-4<br>≥5                                                                                      | 1.00<br>0.98 (0.82-1.17)<br>0.89 (0.72-1.11)<br>0.80 (0.62-1.03)<br>0.74 (0.55-1.02)                                                                                         | Age, BMI, alcohol, smoking, exercise, calories, SFA, fruit and vegetables, red meat, prevalent DM, hypertension                                                                                                                                                                                                                                       |
| Luu HN et al, 2015, USA           | Southern Community Cohort Study      | 2002-2009 - NA, 5.4 years follow-up | 71764 men and women, age 40-79 years: 1857 CVD deaths | FFQ, 89 food items                              | Total nuts and peanut butter, African Americans<br><br>Total nuts and peanut butter, Caucasians | <0.95 g/d<br>0.95-<3.08<br>3.08-<7.30<br>7.30-<18.45<br>≥18.45<br><0.95 g/d<br>0.95-<3.08<br>3.08-<7.30<br>7.30-<18.45<br>≥18.45 | 1.00<br>0.85 (0.72-1.00)<br>0.82 (0.68-0.99)<br>0.81 (0.68-0.97)<br>0.77 (0.63-0.92)<br>1.00<br>0.80 (0.61-1.06)<br>0.74 (0.56-0.97)<br>0.66 (0.49-0.87)<br>0.62 (0.46-0.84) | Age, sex, race, education, occupation, household income, marital status, smoking pack-years, alcohol, BMI, physical activity, vitamin supplement use, Charlson Comorbidity Index, metabolic conditions (hypertension, heart disease, DM, obesity, hypercholesterolemia), total energy, red meat, chicken and duck intake, seafood, vegetables, fruits |
| Luu HN et al, 2015, China         | Shanghai Men's Health Study          | 2002-2006 - NA, 6.5 years follow-up | 61123 men, age 40-74 years: 1108 CVD deaths           | Validated FFQ, 84 food items                    | Peanuts                                                                                         | <0.14 g/d<br>0.14-<0.72<br>0.72-<1.45<br>1.45-<2.54<br>≥2.54                                                                     | 1.00<br>0.94 (0.75-1.17)<br>0.70 (0.57-0.85)<br>0.66 (0.56-0.79)<br>0.78 (0.66-0.93)                                                                                         | Age, race, education, occupation, household income, marital status, smoking pack-years, alcohol, BMI, physical activity, vitamin supplement use, Charlson Comorbidity Index,                                                                                                                                                                          |

|                                            |                               |                                       |                                                                         |                               |                                                                      |                                                                                                            |                                                                                                                                                                                                                  |                                                                                                                                                                                                                                                                                                                                          |
|--------------------------------------------|-------------------------------|---------------------------------------|-------------------------------------------------------------------------|-------------------------------|----------------------------------------------------------------------|------------------------------------------------------------------------------------------------------------|------------------------------------------------------------------------------------------------------------------------------------------------------------------------------------------------------------------|------------------------------------------------------------------------------------------------------------------------------------------------------------------------------------------------------------------------------------------------------------------------------------------------------------------------------------------|
|                                            |                               |                                       |                                                                         |                               |                                                                      |                                                                                                            |                                                                                                                                                                                                                  | metabolic conditions (hypertension, heart disease, DM, obesity, dyslipidemia), total energy, red meat, chicken and duck intake, seafood, vegetables, fruits                                                                                                                                                                              |
| Luu HN et al, 2015, China                  | Shanghai Women's Health Study | 1996-2000 – NA, 12.2 years follow-up  | 73142 women, age 40-70 years: 1479 CVD deaths                           | Validated FFQ, 87 food items  | Peanuts                                                              | <0.14 g/d<br>0.14-<0.72<br>0.72-<1.45<br>1.45-<2.54<br>≥2.54                                               | 1.00<br>0.79 (0.67-0.92)<br>0.78 (0.67-0.91)<br>0.71 (0.61-0.83)<br>0.72 (0.61-0.86)                                                                                                                             | Age, race, education, occupation, household income, marital status, smoking pack-years, alcohol, BMI, physical activity, vitamin supplement use, Charlson Comorbidity Index, metabolic conditions (hypertension, heart disease, DM, obesity, dyslipidemia), total energy, red meat, chicken and duck intake, seafood, vegetables, fruits |
| van den Brandt PA et al, 2015, Netherlands | Netherlands Cohort Study      | 1986-1996, 10 years follow-up         | 3202 subcohort members, men and women, age 55-69 years: 2985 CVD deaths | Validated FFQ, 150 food items | Total nuts, all<br><br>Peanuts<br><br>Tree nuts<br><br>Peanut butter | 0 g/d<br>0.1-<5<br>5-<10<br>≥10<br>0 g/d<br>0.1-<5<br>≥5<br>0 g/d<br>0.1-<5<br>≥5<br>0 g/d<br>0.1-<5<br>≥5 | 1.00<br>0.89 (0.76-1.03)<br>0.74 (0.59-0.91)<br>0.83 (0.69-1.00)<br>1.00<br>0.86 (0.74-0.99)<br>0.78 (0.66-0.93)<br>1.00<br>0.91 (0.78-1.07)<br>0.91 (0.68-1.23)<br>1.00<br>1.00 (0.85-1.17)<br>0.99 (0.80-1.23) | Age, sex, cigarette smoking, number of cigarettes per day, years of smoking, hypertension, DM, body height, BMI, non-occupational physical activity, highest level of education, alcohol, vegetables, fruits, energy, nutritional supplement use, women: HRT                                                                             |
| Bonaccio M et al, 2015, Italy              | The Moli-sani Study           | 2005-2010 – 2011, 4.3 years follow-up | 19386 men and women, mean age 54.5 years: 104 CVD deaths                | Validated FFQ, 188 food items | Nuts                                                                 | Never<br>Ever                                                                                              | 1.00<br>0.87 (0.57-1.32)                                                                                                                                                                                         | Age, sex, education, smoking status, leisure-time physical activity, BMI, energy intake, Mediterranean diet score without nuts                                                                                                                                                                                                           |
| Gopinath B et al, 2015, Australia          | The Blue Mountains Eye Study  | 1992-1994 - 2007, 15 years follow-up  | 2893 men and women, age ≥49 years: 546 CVD deaths                       | Validated FFQ, 145 food items | Nuts, all<br><br>Nuts, women<br><br>Nuts, men                        | 0-0.50 g/d<br>0.90-4.55<br>4.90-100<br>0-0.50 g/d<br>0.90-4.55<br>4.90-100<br>0-0.50 g/d                   | 1.00<br>0.76 (0.61-0.94)<br>0.90 (0.73-1.12)<br>1.00<br>0.61 (0.44-0.85)<br>0.81 (0.59-1.13)<br>1.00                                                                                                             | Age, sex, qualifications, total diet score, BMI, current smoking status, alcohol, self-rated health, walking disability, hypertension, diabetes, doctor-diagnosed history of cancer, angina, stroke, acute myocardial infarction                                                                                                         |

|                                 |                                             |                                         |                                                     |                    |                                               |                                                                                                             |                                                                                                                                                                                                          |                                                                                                                                                                                                                                                              |
|---------------------------------|---------------------------------------------|-----------------------------------------|-----------------------------------------------------|--------------------|-----------------------------------------------|-------------------------------------------------------------------------------------------------------------|----------------------------------------------------------------------------------------------------------------------------------------------------------------------------------------------------------|--------------------------------------------------------------------------------------------------------------------------------------------------------------------------------------------------------------------------------------------------------------|
|                                 |                                             |                                         |                                                     |                    |                                               | 0.90-4.55<br>4.90-100                                                                                       | 0.86 (0.64-1.15)<br>1.00 (0.75-1.34)                                                                                                                                                                     |                                                                                                                                                                                                                                                              |
| Wang JB et al, 2016, China      | Linxian Nutrition Intervention Trial cohort | 1984-1991 - 2010, 19-26 years follow-up | 2445 men and women, age 40-69 years: 807 CVD deaths | FFQ, 64 food items | Nuts                                          | Per 3 times/mo                                                                                              | 0.96 (0.91-1.01)                                                                                                                                                                                         | Age, sex, commune, smoking, drinking, season, BMI                                                                                                                                                                                                            |
| Eslamparast T et al, 2016, Iran | Golestan Cohort Study                       | 2004 - 2013, 7 years follow-up          | 50045 men and women, age ≥40 years: 2016 CVD deaths | Validated FFQ      | Nuts, all<br><br>Nuts, women<br><br>Nuts, men | Never<br><1 serv/wk<br>1-<3<br>≥3<br>Never<br><1 serv/wk<br>1-<3<br>≥3<br>Never<br><1 serv/wk<br>1-<3<br>≥3 | 1.00<br>0.87 (0.79-0.97)<br>0.75 (0.63-0.89)<br>0.77 (0.58-1.01)<br>1.00<br>0.83 (0.71-0.96)<br>0.65 (0.49-0.86)<br>0.55 (0.33-0.91)<br>1.00<br>0.92 (0.80-1.05)<br>0.83 (0.66-1.03)<br>0.90 (0.66-1.26) | Age, sex, BMI, education, place of residence, smoking status, opium, alcohol, physical activity, wealth score, diabetes, hypertension, total energy, fish, red meat, chicken, fruits, vegetables, dairy products, eggs, total fiber, magnesium, zinc, copper |

BMI=body mass index, CVD=cardiovascular disease, DM=diabetes mellitus, FFQ=food frequency questionnaire, FH=family history, HRT=hormone replacement therapy, MI=myocardial infarction, NA=not available, SFA=saturated fatty acids, WHR=waist-to-hip ratio

Supplementary table 6. Nut consumption and total cancer

| Author, publication year, country  | Study name                                                                 | Study period                    | Number of participants, gender, age, number of cases/deaths | Dietary assessment               | Exposure and subgroup                | Nut consumption frequency or amount                                                        | Relative risks (95% confidence intervals)                                                                                                                                                                                    | Adjustment for confounding factors                                                                                                                                                                                                                          |
|------------------------------------|----------------------------------------------------------------------------|---------------------------------|-------------------------------------------------------------|----------------------------------|--------------------------------------|--------------------------------------------------------------------------------------------|------------------------------------------------------------------------------------------------------------------------------------------------------------------------------------------------------------------------------|-------------------------------------------------------------------------------------------------------------------------------------------------------------------------------------------------------------------------------------------------------------|
| Von Ruesten A et al, 2013, Germany | European Prospective Investigation into Cancer and Nutrition–Potsdam study | 1994/1998–NA, 8 years follow-up | 23,531 men and women, age 35–65 years: 844 cancer cases     | Validated FFQ, 148 food items    | Nuts                                 | Per 5 g/d                                                                                  | 1.01 (0.96-1.05)                                                                                                                                                                                                             | Age, sex, smoking status, pack-years of smoking, alcohol, leisure-time physical activity, BMI, WHR, prevalent hypertension, high blood lipid levels, education, vitamin supplementation, total energy, non-consumption of the food group, other food groups |
| Bao Y et al, 2013, USA             | Nurses' Health Study                                                       | 1980-2010, 30 years follow-up   | 76464 women, age 34-59 years: 6535 cancer deaths            | Validated FFQ, 61-116 food items | Nuts<br><br>Peanuts<br><br>Tree nuts | Never<br><1/wk<br>1<br>2-4<br>≥5<br>Never<br><1/wk<br>1<br>≥2<br>Never<br><1/wk<br>1<br>≥2 | 1.00<br>0.94 (0.88-1.01)<br>0.91 (0.84-0.99)<br>0.89 (0.82-0.98)<br>0.94 (0.82-1.09)<br>1.00<br>0.94 (0.88-1.00)<br>0.93 (0.83-1.04)<br>0.97 (0.86-1.09)<br>1.00<br>0.95 (0.89-1.01)<br>0.96 (0.85-1.09)<br>0.83 (0.72-0.96) | Age, race, BMI, physical activity, smoking, screening, multivitamin use, aspirin use, FH – DM, MI or cancer, history of DM, hypertension, or hypercholesterolemia, total energy, alcohol, red or processed meat, fruits, vegetables, menopausal status, HRT |

|                                   |                                       |                                     |                                                          |                                                 |                                                                                                 |                                                                                                                                  |                                                                                                                                                                                                                              |                                                                                                                                                                                                                                                                                                                                                       |
|-----------------------------------|---------------------------------------|-------------------------------------|----------------------------------------------------------|-------------------------------------------------|-------------------------------------------------------------------------------------------------|----------------------------------------------------------------------------------------------------------------------------------|------------------------------------------------------------------------------------------------------------------------------------------------------------------------------------------------------------------------------|-------------------------------------------------------------------------------------------------------------------------------------------------------------------------------------------------------------------------------------------------------------------------------------------------------------------------------------------------------|
| Bao Y et al, 2013, USA            | Health Professional's Follow-up Study | 1986-2010, 24 years follow-up       | 42498 men, age 45-70 years: 3758 cancer deaths           | Validated FFQ, 131 food items                   | Nuts<br><br>Peanuts<br><br>Tree nuts                                                            | Never<br><1/wk<br>1<br>2-4<br>≥5<br>Never<br><1/wk<br>1<br>≥2<br>Never<br><1/wk<br>1<br>≥2                                       | 1.00<br>0.91 (0.82-1.01)<br>0.98 (0.88-1.09)<br>0.95 (0.85-1.05)<br>0.86 (0.75-0.98)<br>1.00<br>0.91 (0.83-0.99)<br>1.00 (0.89-1.11)<br>0.93 (0.84-1.03)<br>1.00<br>0.91 (0.84-0.98)<br>0.95 (0.85-1.06)<br>0.82 (0.73-0.92) | Age, race, BMI, physical activity, smoking, screening, multivitamin use, aspirin use, FH – DM, MI or cancer, history of DM, hypertension, or hypercholesterolemia, total energy, alcohol, red or processed meat, fruits, vegetables                                                                                                                   |
| Guasch-Ferre M et al, 2013, Spain | PREDIMED Study                        | NA-NA, 4.8 years follow-up          | 7216 men and women, age 55-80 years: 130 cancer deaths   | Validated FFQ, 137 food items                   | Nuts<br><br>Walnuts<br><br>Other nuts (excluding walnuts)                                       | Never<br>1-3 serv/wk<br>>3<br>Never<br>1-3 serv/wk<br>>3<br>Never<br>1-3 serv/wk<br>>3                                           | 1.00<br>0.79 (0.52-1.20)<br>0.60 (0.37-0.98)<br>1.00<br>0.76 (0.51-1.12)<br>0.46 (0.27-0.79)<br>1.00<br>0.79 (0.53-1.18)<br>0.75 (0.44-1.27)                                                                                 | Age, sex, and intervention group, BMI, smoking status, education, leisure time physical activity, DM, hypercholesterolemia, oral antidiabetic medication, antihypertensive medication, use of statins, total energy, vegetables, fruits, red meat, eggs, fish, alcohol, Mediterranean diet adherence                                                  |
| Hshieh TT et al, 2015, USA        | Physicians' Health Study              | 1999-2002 – NA, 9.6 years follow-up | 20742 men, mean age 66 years: 868 cancer deaths          | FFQ, 19 food items (validated in other cohorts) | Nuts                                                                                            | <1 serv/mo<br>1-3<br>1 serv/wk<br>2-4<br>≥5                                                                                      | 1.00<br>0.91 (0.77-1.08)<br>0.88 (0.72-1.07)<br>0.87 (0.68-1.09)<br>0.87 (0.66-1.15)                                                                                                                                         | Age, BMI, alcohol, smoking, exercise, calories, SFA, fruit and vegetables, red meat, prevalent DM, hypertension                                                                                                                                                                                                                                       |
| Luu HN et al, 2015, USA           | Southern Community Cohort Study       | 2002-2009 - NA, 5.4 years follow-up | 71764 men and women, age 40-79 years: 1551 cancer deaths | FFQ, 89 food items                              | Total nuts and peanut butter, African Americans<br><br>Total nuts and peanut butter, Caucasians | <0.95 g/d<br>0.95-<3.08<br>3.08-<7.30<br>7.30-<18.45<br>≥18.45<br><0.95 g/d<br>0.95-<3.08<br>3.08-<7.30<br>7.30-<18.45<br>≥18.45 | 1.00<br>0.89 (0.73-1.07)<br>0.85 (0.69-1.05)<br>0.91 (0.74-1.11)<br>0.74 (0.60-0.92)<br>1.00<br>0.98 (0.72-1.32)<br>0.89 (0.65-1.21)<br>0.68 (0.48-0.94)<br>0.93 (0.68-1.29)                                                 | Age, sex, race, education, occupation, household income, marital status, smoking pack-years, alcohol, BMI, physical activity, vitamin supplement use, Charlson Comorbidity Index, metabolic conditions (hypertension, heart disease, DM, obesity, hypercholesterolemia), total energy, red meat, chicken and duck intake, seafood, vegetables, fruits |

|                                            |                               |                                       |                                                                            |                               |                                                                      |                                                                                                            |                                                                                                                                                                                                                  |                                                                                                                                                                                                                                                                                                                                          |
|--------------------------------------------|-------------------------------|---------------------------------------|----------------------------------------------------------------------------|-------------------------------|----------------------------------------------------------------------|------------------------------------------------------------------------------------------------------------|------------------------------------------------------------------------------------------------------------------------------------------------------------------------------------------------------------------|------------------------------------------------------------------------------------------------------------------------------------------------------------------------------------------------------------------------------------------------------------------------------------------------------------------------------------------|
| Luu HN et al, 2015, China                  | Shanghai Men's Health Study   | 2002-2006 - NA, 6.5 years follow-up   | 61123 men, age 40-74 years: 1492 cancer deaths                             | Validated FFQ, 84 food items  | Peanuts                                                              | <0.14 g/d<br>0.14-<0.72<br>0.72-<1.45<br>1.45-<2.54<br>≥2.54                                               | 1.00<br>0.91 (0.72-1.13)<br>0.88 (0.74-1.05)<br>1.01 (0.88-1.17)<br>0.96 (0.83-1.11)                                                                                                                             | Age, race, education, occupation, household income, marital status, smoking pack-years, alcohol, BMI, physical activity, vitamin supplement use, Charlson Comorbidity Index, metabolic conditions (hypertension, heart disease, DM, obesity, dyslipidemia), total energy, red meat, chicken and duck intake, seafood, vegetables, fruits |
| Luu HN et al, 2015, China                  | Shanghai Women's Health Study | 1996-2000 - NA, 12.2 years follow-up  | 73142 women, age 40-70 years: 2040 cancer deaths                           | Validated FFQ, 87 food items  | Peanuts                                                              | <0.14 g/d<br>0.14-<0.72<br>0.72-<1.45<br>1.45-<2.54<br>≥2.54                                               | 1.00<br>0.87 (0.76-1.00)<br>0.83 (0.61-1.06)<br>0.92 (0.81-1.06)<br>0.97 (0.84-1.12)                                                                                                                             | Age, race, education, occupation, household income, marital status, smoking pack-years, alcohol, BMI, physical activity, vitamin supplement use, Charlson Comorbidity Index, metabolic conditions (hypertension, heart disease, DM, obesity, dyslipidemia), total energy, red meat, chicken and duck intake, seafood, vegetables, fruits |
| van den Brandt PA et al, 2015, Netherlands | Netherlands Cohort Study      | 1986-1996, 10 years follow-up         | 3202 subcohort members, men and women, age 55-69 years: 3917 cancer deaths | Validated FFQ, 150 food items | Total nuts, all<br><br>Peanuts<br><br>Tree nuts<br><br>Peanut butter | 0 g/d<br>0.1-<5<br>5-<10<br>≥10<br>0 g/d<br>0.1-<5<br>≥5<br>0 g/d<br>0.1-<5<br>≥5<br>0 g/d<br>0.1-<5<br>≥5 | 1.00<br>0.92 (0.81-1.05)<br>0.82 (0.68-0.98)<br>0.79 (0.67-0.93)<br>1.00<br>0.93 (0.82-1.05)<br>0.80 (0.69-0.93)<br>1.00<br>0.97 (0.85-1.11)<br>0.81 (0.62-1.05)<br>1.00<br>1.04 (0.90-1.20)<br>0.98 (0.82-1.17) | Age, sex, cigarette smoking, number of cigarettes per day, years of smoking, hypertension, DM, body height, BMI, non-occupational physical activity, highest level of education, alcohol, vegetables, fruits, energy, nutritional supplement use, women: HRT                                                                             |
| Bonaccio M et al, 2015, Italy              | The Moli-sani Study           | 2005-2010 - 2011, 4.3 years follow-up | 19386 men and women, mean age 54.5 years: 124 cancer deaths                | Validated FFQ, 188 food items | Nuts                                                                 | Never<br>Ever                                                                                              | 1.00<br>0.64 (0.44-0.94)                                                                                                                                                                                         | Age, sex, education, smoking status, leisure-time physical activity, BMI, energy intake, Mediterranean diet score without nuts                                                                                                                                                                                                           |



|                                 |                       |                                |                                                             |               |             |            |                  |                                                                                                                                                                                                                                                              |
|---------------------------------|-----------------------|--------------------------------|-------------------------------------------------------------|---------------|-------------|------------|------------------|--------------------------------------------------------------------------------------------------------------------------------------------------------------------------------------------------------------------------------------------------------------|
| Eslamparast T et al, 2016, Iran | Golestan Cohort Study | 2004 - 2013, 7 years follow-up | 50045 men and women, age $\geq$ 40 years: 887 cancer deaths | Validated FFQ | Nuts, all   | Never      | 1.00             | Age, sex, BMI, education, place of residence, smoking status, opium, alcohol, physical activity, wealth score, diabetes, hypertension, total energy, fish, red meat, chicken, fruits, vegetables, dairy products, eggs, total fiber, magnesium, zinc, copper |
|                                 |                       |                                |                                                             |               |             | <1 serv/wk | 0.96 (0.82-1.11) |                                                                                                                                                                                                                                                              |
|                                 |                       |                                |                                                             |               |             | 1-<3       | 0.84 (0.65-1.07) |                                                                                                                                                                                                                                                              |
|                                 |                       |                                |                                                             |               |             | $\geq$ 3   | 0.62 (0.38-1.01) |                                                                                                                                                                                                                                                              |
|                                 |                       |                                |                                                             |               | Nuts, women | Never      | 1.00             |                                                                                                                                                                                                                                                              |
|                                 |                       |                                |                                                             |               |             | <1 serv/wk | 0.91 (0.73-1.14) |                                                                                                                                                                                                                                                              |
|                                 |                       |                                |                                                             |               |             | 1-<3       | 0.72 (0.48-1.07) |                                                                                                                                                                                                                                                              |
|                                 |                       |                                |                                                             |               |             | $\geq$ 3   | 0.43 (0.18-1.01) |                                                                                                                                                                                                                                                              |
|                                 |                       |                                |                                                             |               | Nuts, men   | Never      | 1.00             |                                                                                                                                                                                                                                                              |
|                                 | <1 serv/wk            | 0.98 (0.80-1.20)               |                                                             |               |             |            |                  |                                                                                                                                                                                                                                                              |
|                                 | 1-<3                  | 0.90 (0.65-1.25)               |                                                             |               |             |            |                  |                                                                                                                                                                                                                                                              |
|                                 | $\geq$ 3              | 0.73 (0.41-1.33)               |                                                             |               |             |            |                  |                                                                                                                                                                                                                                                              |

BMI=body mass index, DM=diabetes mellitus, FFQ=food frequency questionnaire, FH=family history, HRT=hormone replacement therapy, MI=myocardial infarction, NA=not available, SFA=saturated fatty acids, WHR=waist-to-hip ratio

Supplementary table 7. Nut consumption and all-cause mortality

| Author, publication year, country, region | Study name                                                   | Study period                           | Number of participants, gender, age, number of deaths                                                                                              | Dietary assessment                               | Exposure and subgroup                    | Nut consumption frequency or amount                                                                           | Relative risks (95% confidence intervals)                                                                                                            | Adjustment for confounding factors                                                                                                                                           |
|-------------------------------------------|--------------------------------------------------------------|----------------------------------------|----------------------------------------------------------------------------------------------------------------------------------------------------|--------------------------------------------------|------------------------------------------|---------------------------------------------------------------------------------------------------------------|------------------------------------------------------------------------------------------------------------------------------------------------------|------------------------------------------------------------------------------------------------------------------------------------------------------------------------------|
| Fraser GE et al, 1997, USA                | Adventist Health Study                                       | 1974-1976 – 1985, ~9.5 years follow-up | 1668 black men and women, age $\geq 25$ years: 416 deaths                                                                                          | FFQ, 65 food items                               | Nuts<br><br>Nuts, men<br><br>Nuts, women | <1/wk<br>1-4/wk<br>$\geq 5$ /wk<br><br><1/wk<br>1-4/wk<br>$\geq 5$ /wk<br><br><1/wk<br>1-4/wk<br>$\geq 5$ /wk | 1.0<br>0.6 (0.4-0.9)<br>0.6 (0.3-1.0)<br><br>1.0<br>0.7 (0.4-1.4)<br>0.6 (0.2-1.3)<br><br>1.0<br>0.4 (0.2-0.9)<br>0.5 (0.2-1.2)                      | Age, smoking, exercise                                                                                                                                                       |
| Fraser GE et al, 1997, USA                | Adventist Health Study                                       | 1974-1976 – 1988, 12 years follow-up   | 603 white men and women, age >84 years at baseline + additional subjects who became >84 years during follow-up (number not available): 1387 deaths | FFQ, 65 food items                               | Nuts<br><br>Nuts, men<br><br>Nuts, women | <1/wk<br>1-4/wk<br>$\geq 5$ /wk<br><br><1/wk<br>1-4/wk<br>$\geq 5$ /wk<br><br><1/wk<br>1-4/wk<br>$\geq 5$ /wk | 1.00<br>0.88 (0.76-1.01)<br>0.82 (0.70-0.96)<br><br>1.00<br>0.84 (0.64-1.09)<br>0.77 (0.58-1.02)<br><br>1.00<br>0.89 (0.75-1.06)<br>0.84 (0.70-1.01) | Age, sex, DM, smoking, exercise, fruits, bread, donuts, sweet desserts, beef, fish                                                                                           |
| Mann JI, 1997, England                    | The Oxford Vegetarian Study                                  | 1980-1984 – 1995, 13.3 years follow-up | 10802 men and women, age 16-79 years: 392 deaths                                                                                                   | FFQ                                              | Nuts                                     | <1/wk<br>1-4<br>$\geq 5$                                                                                      | 1.00<br>0.99 (0.79-1.25)<br>0.77 (0.58-1.01)                                                                                                         | Age, sex, smoking, social class                                                                                                                                              |
| Blomhoff R et al, 2006, USA               | Iowa Women's Health Study                                    | 1986-2001, 15 years follow-up          | 31778 women, age 55-69 years: 5451 deaths                                                                                                          | FFQ, 127 food items (validated in other studies) | Nuts and peanut butter                   | 0.0/wk<br>0.5<br>1.5<br>7.0                                                                                   | 1.00<br>0.93 (0.85-1.02)<br>0.88 (0.81-0.95)<br>0.89 (0.81-0.99)                                                                                     | Age, energy intake, BMI, WHR, physical activity, HRT, multivitamin supplements, alcohol, whole grain, refined grain, red meat, fish and seafood, total fruits and vegetables |
| Leenders M et al, 2013, Europe            | European Prospective Investigation into Cancer and Nutrition | 1992-2000 – 2010, 13 years follow-up   | 451151 men and women, age 25-70 years: 25682 deaths                                                                                                | Validated FFQ, 7-day record                      | Nuts and seeds                           | 1<br>2<br>3<br>4                                                                                              | 1.16 (1.11-1.21)<br>1.00<br>1.02 (0.97-1.06)<br>1.03 (0.99-1.08)                                                                                     | Age, smoking status, smoking duration, time since stopped smoking, number of cigarettes per day, alcohol, BMI, physical activity, education, processed meat                  |

|                                        |                                      |                               |                                                 |                                  |                                                           |                                                                                                   |                                                                                                                                                                                                                                                  |                                                                                                                                                                                                                                                                                                      |
|----------------------------------------|--------------------------------------|-------------------------------|-------------------------------------------------|----------------------------------|-----------------------------------------------------------|---------------------------------------------------------------------------------------------------|--------------------------------------------------------------------------------------------------------------------------------------------------------------------------------------------------------------------------------------------------|------------------------------------------------------------------------------------------------------------------------------------------------------------------------------------------------------------------------------------------------------------------------------------------------------|
| Bao Y et al, 2013, USA                 | Nurses' Health Study                 | 1980-2010, 30 years follow-up | 76464 women, age 34-59 years: 16200 deaths      | Validated FFQ, 61-116 food items | Nuts<br><br>Peanuts<br><br>Tree nuts                      | Never<br><1/wk<br>1<br>2-4<br>5-6<br>≥7<br>Never<br><1/wk<br>1<br>≥2<br>Never<br><1/wk<br>1<br>≥2 | 1.00<br>0.94 (0.90-0.98)<br>0.88 (0.83-0.92)<br>0.85 (0.80-0.90)<br>0.88 (0.78-0.98)<br>0.79 (0.68-0.91)<br>1.00<br>0.92 (0.88-0.96)<br>0.88 (0.82-0.94)<br>0.91 (0.84-0.98)<br>1.00<br>0.95 (0.92-1.00)<br>0.90 (0.83-0.97)<br>0.82 (0.75-0.90) | Age, race, BMI, physical activity, smoking, screening, multivitamin use, aspirin use, FH – DM, MI or cancer, history of DM, hypertension, or hypercholesterolemia, total energy, alcohol, red or processed meat, fruits, vegetables, menopausal status, HRT                                          |
| Bao Y et al, 2013, USA                 | Health Professionals Follow-up Study | 1986-2010, 24 years follow-up | 42498 men, age 45-70 years: 11229 deaths        | Validated FFQ, 131 food items    | Nuts<br><br>Peanuts<br><br>Tree nuts                      | Never<br><1/wk<br>1<br>2-4<br>5-6<br>≥7<br>Never<br><1/wk<br>1<br>≥2<br>Never<br><1/wk<br>1<br>≥2 | 1.00<br>0.91 (0.85-0.96)<br>0.91 (0.86-0.97)<br>0.89 (0.83-0.94)<br>0.83 (0.76-0.91)<br>0.80 (0.73-0.88)<br>1.00<br>0.91 (0.87–0.96)<br>0.93 (0.88–0.99)<br>0.86 (0.82–0.92)<br>1.00<br>0.94 (0.90–0.98)<br>0.95 (0.89–1.01)<br>0.84 (0.78–0.89) | Age, race, BMI, physical activity, smoking, screening, multivitamin use, aspirin use, FH – DM, MI or cancer, history of DM, hypertension, or hypercholesterolemia, total energy, alcohol, red or processed meat, fruits, vegetables                                                                  |
| Guasch-Ferre M et al, 2013, Spain      | PREDIMED Study                       | NA-NA, 4.8 years follow-up    | 7216 men and women, age 55-80 years: 323 deaths | Validated FFQ, 137 food items    | Nuts<br><br>Walnuts<br><br>Other nuts (excluding walnuts) | Never<br>1-3 serv/wk<br>>3<br>Never<br>1-3 serv/wk<br>>3<br>Never<br>1-3 serv/wk<br>>3            | 1.00<br>0.71 (0.54- 0.93)<br>0.61 (0.45- 0.83)<br>1.00<br>0.66 (0.51-0.86)<br>0.55 (0.40-0.76)<br>1.00<br>0.80 (0.62-1.03)<br>0.66 (0.46-0.93)                                                                                                   | Age, sex, and intervention group, BMI, smoking status, education, leisure time physical activity, DM, hypercholesterolemia, oral antidiabetic medication, antihypertensive medication, use of statins, total energy, vegetables, fruits, red meat, eggs, fish, alcohol, Mediterranean diet adherence |
| Fernandez-Montero A et al, 2014, Spain | The SUN Study                        | 1999 – 2012, 5                | 17184 men and women, mean age                   | Validated FFQ, 136               | Nuts                                                      | 0 g/d<br>2.3                                                                                      | 1.00<br>0.81 (0.44-1.50)                                                                                                                                                                                                                         | Age, sex, BMI, smoking, alcohol intake, adherence to Mediterranean                                                                                                                                                                                                                                   |

|                            |                                 |                                     |                                                   |                                                 |                                                                                                                                                                 |                                                                                                                                                                                                                                                                                                                                               |                                                                                                                                                                                                                                                                                                                                                                                                                                                              |                                                                                                                                                                                                                                                                                                                                                       |
|----------------------------|---------------------------------|-------------------------------------|---------------------------------------------------|-------------------------------------------------|-----------------------------------------------------------------------------------------------------------------------------------------------------------------|-----------------------------------------------------------------------------------------------------------------------------------------------------------------------------------------------------------------------------------------------------------------------------------------------------------------------------------------------|--------------------------------------------------------------------------------------------------------------------------------------------------------------------------------------------------------------------------------------------------------------------------------------------------------------------------------------------------------------------------------------------------------------------------------------------------------------|-------------------------------------------------------------------------------------------------------------------------------------------------------------------------------------------------------------------------------------------------------------------------------------------------------------------------------------------------------|
|                            |                                 | years follow-up                     | 38-42 years: 119 deaths                           | food items                                      |                                                                                                                                                                 | 4.3<br>6.4<br>20.1<br>Never/almost never<br>1-3/mo<br>1/wk<br>≥2/wk                                                                                                                                                                                                                                                                           | 0.99 (0.56-1.77)<br>0.82 (0.46-1.46)<br>0.56 (0.30-1.06)<br>1.00<br>0.82 (0.51-1.30)<br>0.81 (0.46-1.43)<br>0.44 (0.23-0.86)                                                                                                                                                                                                                                                                                                                                 | diet, use of special diets, marital status, hypercholesterolemia, hypertension, physical activity, length of television watching, cancer, CVD, DM, total energy                                                                                                                                                                                       |
| Hshieh TT et al, 2015, USA | Physicians' Health Study        | 1999-2002 – NA, 9.6 years follow-up | 20742 men, mean age 66 years: 2732 deaths         | FFQ, 19 food items (validated in other cohorts) | Nuts                                                                                                                                                            | <1 serv/mo<br>1-3<br>1 serv/wk<br>2-4<br>≥5                                                                                                                                                                                                                                                                                                   | 1.00<br>0.92 (0.83-1.01)<br>0.84 (0.75-0.95)<br>0.86 (0.75-0.95)<br>0.76 (0.64-0.89)                                                                                                                                                                                                                                                                                                                                                                         | Age, BMI, alcohol, smoking, exercise, calories, SFA, fruit and vegetables, red meat, prevalent DM, hypertension                                                                                                                                                                                                                                       |
| Luu HN et al, 2015, USA    | Southern Community Cohort Study | 2002-2009, 5.4 years follow-up      | 71764 men and women, age 40-79 years: 6256 deaths | FFQ, 89 food items                              | Total nuts and peanut butter, all<br><br>Nuts<br><br>Peanut butter intake only<br><br>Total nuts and peanut butter, men<br><br>Nuts<br><br>Peanut butter intake | <0.95 g/d<br>0.95-<3.08<br>3.08-<7.30<br>7.30-<18.45<br>≥18.45<br><0.36 g/d<br>0.36-<0.66<br>0.66-<4.14<br>4.14-<8.63<br>≥8.63<br><0.19 g/d<br>0.19-<0.59<br>0.59-<2.18<br>2.18-<6.32<br>≥6.32<br><0.95 g/d<br>0.95-<3.08<br>3.08-<7.30<br>7.30-<18.45<br>≥18.45<br><0.36 g/d<br>0.36-<0.66<br>0.66-<4.14<br>4.14-<8.63<br>≥8.63<br><0.19 g/d | 1.00<br>0.90 (0.83-0.97)<br>0.84 (0.77-0.91)<br>0.84 (0.77-0.91)<br>0.79 (0.73-0.86)<br>1.00<br>0.92 (0.85-0.99)<br>0.81 (0.74-0.88)<br>0.78 (0.72-0.84)<br>0.73 (0.67-0.79)<br>1.00<br>0.91 (0.83-0.99)<br>0.80 (0.72-0.91)<br>1.00 (0.91-1.09)<br>0.86 (0.79-0.94)<br>1.00<br>0.83 (0.74-0.94)<br>0.84 (0.74-0.95)<br>0.77 (0.68-0.87)<br>0.72 (0.64-0.81)<br>1.00<br>0.88 (0.80-0.98)<br>0.76 (0.66-0.87)<br>0.72 (0.64-0.81)<br>0.70 (0.62-0.79)<br>1.00 | Age, sex, race, education, occupation, household income, marital status, smoking pack-years, alcohol, BMI, physical activity, vitamin supplement use, Charlson Comorbidity Index, metabolic conditions (hypertension, heart disease, DM, obesity, hypercholesterolemia), total energy, red meat, chicken and duck intake, seafood, vegetables, fruits |

|                           |                               |                                      |                                           |                              |                                     |                                                                |                                                                                      |                                                                                                                                                                                                                                                                                                                                          |
|---------------------------|-------------------------------|--------------------------------------|-------------------------------------------|------------------------------|-------------------------------------|----------------------------------------------------------------|--------------------------------------------------------------------------------------|------------------------------------------------------------------------------------------------------------------------------------------------------------------------------------------------------------------------------------------------------------------------------------------------------------------------------------------|
|                           |                               |                                      |                                           |                              | only                                | 0.19-<0.59<br>0.59-<2.18<br>2.18-<6.32<br>≥6.32                | 0.96 (0.85-1.08)<br>0.90 (0.77-1.04)<br>0.97 (0.86-1.09)<br>0.88 (0.78-1.00)         |                                                                                                                                                                                                                                                                                                                                          |
|                           |                               |                                      |                                           |                              | Total nuts and peanut butter, women | <0.95 g/d<br>0.95-<3.08<br>3.08-<7.30<br>7.30-<18.45<br>≥18.45 | 1.00<br>0.89 (0.80-0.99)<br>0.79 (0.70-0.89)<br>0.87 (0.77-0.98)<br>0.77 (0.67-0.88) |                                                                                                                                                                                                                                                                                                                                          |
|                           |                               |                                      |                                           |                              | Nuts                                | <0.36 g/d<br>0.36-<0.66<br>0.66-<4.14<br>4.14-<8.63<br>≥8.63   | 1.00<br>0.83 (0.74-0.93)<br>0.84 (0.75-0.95)<br>0.77 (0.68-0.87)<br>0.75 (0.66-0.85) |                                                                                                                                                                                                                                                                                                                                          |
|                           |                               |                                      |                                           |                              | Peanut butter intake only           | <0.19 g/d<br>0.19-<0.59<br>0.59-<2.18<br>2.18-<6.32<br>≥6.32   | 1.00<br>0.86 (0.76-0.97)<br>0.81 (0.71-0.92)<br>0.94 (0.81-1.08)<br>0.86 (0.76-0.98) |                                                                                                                                                                                                                                                                                                                                          |
| Luu HN et al, 2015, China | Shanghai Men's Health Study   | 2002-2006 - NA, 6.5 years follow-up  | 61123 men, age 40-74 years: 3387 deaths   | Validated FFQ, 84 food items | Peanuts                             | <0.14 g/d<br>0.14-<0.72<br>0.72-<1.45<br>1.45-<2.54<br>≥2.54   | 1.00<br>0.87 (0.76-1.00)<br>0.77 (0.69-0.87)<br>0.82 (0.75-0.91)<br>0.83 (0.75-0.91) | Age, race, education, occupation, household income, marital status, smoking pack-years, alcohol, BMI, physical activity, vitamin supplement use, Charlson Comorbidity Index, metabolic conditions (hypertension, heart disease, DM, obesity, dyslipidemia), total energy, red meat, chicken and duck intake, seafood, vegetables, fruits |
| Luu HN et al, 2015, China | Shanghai Women's Health Study | 1996-2000 - NA, 12.2 years follow-up | 73142 women, age 40-70 years: 4757 deaths | Validated FFQ, 87 food items | Peanuts                             | <0.14 g/d<br>0.14-<0.72<br>0.72-<1.45<br>1.45-<2.54<br>≥2.54   | 1.00<br>0.80 (0.73-0.87)<br>0.79 (0.72-0.86)<br>0.80 (0.73-0.87)<br>0.83 (0.75-0.91) | Age, race, education, occupation, household income, marital status, smoking pack-years, alcohol, BMI, physical activity, vitamin supplement use, Charlson Comorbidity Index, metabolic conditions (hypertension, heart disease, DM, obesity, dyslipidemia), total energy, red meat, chicken and duck intake, seafood, vegetables, fruits |

|                                            |                              |                                       |                                                                     |                               |                                                                                                |                                                                                                                                                                                  |                                                                                                                                                                                                                                                                                                                                                          |                                                                                                                                                                                                                                                              |
|--------------------------------------------|------------------------------|---------------------------------------|---------------------------------------------------------------------|-------------------------------|------------------------------------------------------------------------------------------------|----------------------------------------------------------------------------------------------------------------------------------------------------------------------------------|----------------------------------------------------------------------------------------------------------------------------------------------------------------------------------------------------------------------------------------------------------------------------------------------------------------------------------------------------------|--------------------------------------------------------------------------------------------------------------------------------------------------------------------------------------------------------------------------------------------------------------|
| van den Brandt PA et al, 2015, Netherlands | Netherlands Cohort Study     | 1986-1996, 10 years follow-up         | 3202 subcohort members, men and women, age 55-69 years: 8823 deaths | Validated FFQ, 150 food items | Total nuts, all<br>Peanuts<br>Tree nuts<br>Peanut butter<br>Tree nuts, men<br>Tree nuts, women | 0 g/d<br>0.1-<5<br>5-<10<br>≥10<br>0 g/d<br>0.1-<5<br>≥5<br>0 g/d<br>0.1-<5<br>≥5<br>0 g/d<br>0.1-<5<br>≥5<br>0 g/d<br>0.1-<5<br>5-<10<br>≥10<br>0 g/d<br>0.1-<5<br>5-<10<br>≥10 | 1.00<br>0.88 (0.78-0.99)<br>0.74 (0.63-0.88)<br>0.77 (0.66-0.89)<br>1.00<br>0.87 (0.77-0.98)<br>0.76 (0.66-0.87)<br>1.00<br>0.93 (0.82-1.05)<br>0.83 (0.66-1.06)<br>1.00<br>1.03 (0.90-1.17)<br>0.97 (0.81-1.15)<br>1.00<br>0.86 (0.72-1.02)<br>0.71 (0.57-0.88)<br>0.76 (0.63-0.92)<br>1.00<br>0.87 (0.74-1.02)<br>0.79 (0.61-1.01)<br>0.79 (0.63-1.00) | Age, sex, cigarette smoking, number of cigarettes per day, years of smoking, hypertension, DM, body height, BMI, non-occupational physical activity, highest level of education, alcohol, vegetables, fruits, energy, nutritional supplement use, women: HRT |
| Gopinath B et al, 2015, Australia          | The Blue Mountains Eye Study | 1992-1994 - 2007, 15 years follow-up  | 2893 men and women, age ≥49 years: 1044 deaths                      | Validated FFQ, 145 food items | Nuts, all<br>Nuts, women<br>Nuts, men                                                          | 0-0.50 g/d<br>0.90-4.55<br>4.90-100<br>0-0.50 g/d<br>0.90-4.55<br>4.90-100<br>0-0.50 g/d<br>0.90-4.55<br>4.90-100                                                                | 1.00<br>0.76 (0.65-0.89)<br>0.93 (0.72-1.08)<br>1.00<br>0.73 (0.58-0.92)<br>0.93 (0.73-1.18)<br>1.00<br>0.78 (0.63-0.97)<br>0.89 (0.72-1.10)                                                                                                                                                                                                             | Age, sex, qualifications, total diet score, BMI, current smoking status, alcohol, self-rated health, walking disability, hypertension, diabetes, doctor-diagnosed history of cancer, angina, stroke, acute myocardial infarction                             |
| Bonaccio M et al, 2015, Italy              | The Moli-sani Study          | 2005-2010 – 2011, 4.3 years follow-up | 19386 men and women, mean age 54.5 years: 334 deaths                | Validated FFQ, 188 food items | Nuts                                                                                           | Never<br>≤2 times/mo<br>3-7/mo<br>≥8/mo                                                                                                                                          | 1.00<br>0.68 (0.43-0.87)<br>0.56 (0.31-1.00)<br>0.53 (0.32-0.90)                                                                                                                                                                                                                                                                                         | Age, sex, education, smoking status, leisure-time physical activity, BMI, energy intake, Mediterranean diet score without nuts (including vegetables, legumes, fruit, dairy products, cereals, meat and meat products, fish, alcohol, MUFA/PUFA)             |
| Wang JB et al, 2016, China                 | Linxian Nutrition            | 1984-1991 - 2010, 19-                 | 2445 men and women, age 40-69                                       | FFQ, 64 food items            | Nuts                                                                                           | Per 3 times/mo                                                                                                                                                                   | 0.99 (0.96-1.02)                                                                                                                                                                                                                                                                                                                                         | Age, sex, commune, smoking, drinking, season, BMI                                                                                                                                                                                                            |

|                                    |                              |                                         |                                                             |                  |             |                                         |                                                                  |                                                                                                                                                                                                                                                                                |
|------------------------------------|------------------------------|-----------------------------------------|-------------------------------------------------------------|------------------|-------------|-----------------------------------------|------------------------------------------------------------------|--------------------------------------------------------------------------------------------------------------------------------------------------------------------------------------------------------------------------------------------------------------------------------|
|                                    | Intervention<br>Trial cohort | 26 years<br>follow-up                   | years: 1501 deaths                                          |                  |             |                                         |                                                                  |                                                                                                                                                                                                                                                                                |
| Eslamparast T et al,<br>2016, Iran | Golestan Cohort<br>Study     | 2004 -<br>2013, 7<br>years<br>follow-up | 50045 men and<br>women, age $\geq$ 40<br>years: 3981 deaths | Validated<br>FFQ | Nuts, all   | Never<br><1 serv/wk<br>1-<3<br>$\geq$ 3 | 1.00<br>0.89 (0.82-0.95)<br>0.75 (0.67-0.85)<br>0.71 (0.58-0.86) | Age, sex, BMI, education, place of<br>residence, smoking status, opium,<br>alcohol, physical activity, wealth score,<br>diabetes, hypertension, total energy,<br>fish, red meat, chicken, fruits,<br>vegetables, dairy products, eggs, total<br>fiber, magnesium, zinc, copper |
|                                    |                              |                                         |                                                             |                  | Nuts, women | Never<br><1 serv/wk<br>1-<3<br>$\geq$ 3 | 1.00<br>0.82 (0.74-0.91)<br>0.65 (0.54-0.79)<br>0.49 (0.34-0.71) |                                                                                                                                                                                                                                                                                |
|                                    |                              |                                         |                                                             |                  | Nuts, men   | Never<br><1 serv/wk<br>1-<3<br>$\geq$ 3 | 1.00<br>0.94 (0.85-1.03)<br>0.82 (0.70-0.96)<br>0.84 (0.66-1.07) |                                                                                                                                                                                                                                                                                |

BMI=body mass index, CVD=cardiovascular disease, DM=diabetes mellitus, FFQ=food frequency questionnaire, FH=family history, HRT=hormone replacement therapy,  
MI=myocardial infarction, NA=not available, SFA=saturated fatty acids, WHR=waist-to-hip ratio

Supplementary table 8. Nut consumption and respiratory disease mortality

| Author, publication year, country          | Study name                           | Study period                  | Number of participants, gender, age, number of deaths                                  | Dietary assessment               | Exposure and subgroup                | Nut consumption frequency or amount                                                        | Relative risks (95% confidence intervals)                                                                                                                                                                                    | Adjustment for confounding factors                                                                                                                                                                                                                           |
|--------------------------------------------|--------------------------------------|-------------------------------|----------------------------------------------------------------------------------------|----------------------------------|--------------------------------------|--------------------------------------------------------------------------------------------|------------------------------------------------------------------------------------------------------------------------------------------------------------------------------------------------------------------------------|--------------------------------------------------------------------------------------------------------------------------------------------------------------------------------------------------------------------------------------------------------------|
| Bao Y et al, 2013, USA                     | Nurses' Health Study                 | 1980-2010, 30 years follow-up | 76464 women, age 34-59 years: 809 respiratory disease deaths                           | Validated FFQ, 61-116 food items | Nuts<br><br>Peanuts<br><br>Tree nuts | Never<br><1/wk<br>1<br>2-4<br>≥5<br>Never<br><1/wk<br>1<br>≥2<br>Never<br><1/wk<br>1<br>≥2 | 1.00<br>0.99 (0.84-1.15)<br>0.86 (0.71-1.04)<br>0.74 (0.60-0.92)<br>0.65 (0.45-0.94)<br>1.00<br>0.89 (0.77-1.03)<br>0.73 (0.56-0.96)<br>0.79 (0.61-1.04)<br>1.00<br>1.11 (0.96-1.29)<br>0.72 (0.53-0.98)<br>0.82 (0.59-1.15) | Age, race, BMI, physical activity, smoking, screening, multivitamin use, aspirin use, FH – DM, MI or cancer, history of DM, hypertension, or hypercholesterolemia, total energy, alcohol, red or processed meat, fruits, vegetables, menopausal status, HRT  |
| Bao Y et al, 2013, USA                     | Health Professionals Follow-up Study | 1986-2010, 24 years follow-up | 42498 men, age 45-70 years: 1192 respiratory disease deaths                            | Validated FFQ, 131 food items    | Nuts<br><br>Peanuts<br><br>Tree nuts | Never<br><1/wk<br>1<br>2-4<br>≥5<br>Never<br><1/wk<br>1<br>≥2<br>Never<br><1/wk<br>1<br>≥2 | 1.00<br>0.89 (0.71-1.11)<br>0.99 (0.78-1.24)<br>0.94 (0.75-1.18)<br>0.84 (0.64-1.11)<br>1.00<br>0.94 (0.78-1.13)<br>1.03 (0.81-1.30)<br>0.87 (0.70-1.08)<br>1.00<br>1.03 (0.86-1.22)<br>1.00 (0.79-1.27)<br>0.94 (0.74-1.20) | Age, race, BMI, physical activity, smoking, screening, multivitamin use, aspirin use, FH – DM, MI or cancer, history of DM, hypertension, or hypercholesterolemia, total energy, alcohol, red or processed meat, fruits, vegetables                          |
| van den Brandt PA et al, 2015, Netherlands | Netherlands Cohort Study             | 1986-1996, 10 years follow-up | 3202 subcohort members, men and women, age 55-69 years: 550 respiratory disease deaths | Validated FFQ, 150 food items    | Total nuts, all<br><br>Peanuts       | 0 g/d<br>0.1-<5<br>5-<10<br>≥10<br>0 g/d<br>0.1-<5<br>≥5                                   | 1.00<br>0.67 (0.52-0.88)<br>0.58 (0.39-0.87)<br>0.61 (0.43-0.87)<br>1.00<br>0.68 (0.52-0.88)<br>0.61 (0.44-0.83)                                                                                                             | Age, sex, cigarette smoking, number of cigarettes per day, years of smoking, hypertension, DM, body height, BMI, non-occupational physical activity, highest level of education, alcohol, vegetables, fruits, energy, nutritional supplement use, women: HRT |



|  |  |  |  |  |               |        |                  |  |
|--|--|--|--|--|---------------|--------|------------------|--|
|  |  |  |  |  | Tree nuts     | 0 g/d  | 1.00             |  |
|  |  |  |  |  |               | 0.1-<5 | 0.75 (0.56-1.01) |  |
|  |  |  |  |  |               | ≥5     | 0.82 (0.44-1.54) |  |
|  |  |  |  |  | Peanut butter | 0 g/d  | 1.00             |  |
|  |  |  |  |  |               | 0.1-<5 | 1.23 (0.92-1.64) |  |
|  |  |  |  |  |               | ≥5     | 0.77 (0.50-1.18) |  |

BMI=body mass index, DM=diabetes mellitus, FFQ=food frequency questionnaire, FH=family history, HRT=hormone replacement therapy, MI=myocardial infarction

Supplementary table 9. Nut consumption and diabetes mortality

| Author, publication year, country | Study name                           | Study period                        | Number of participants, gender, age, number of deaths     | Dietary assessment               | Exposure and subgroup                                                                           | Nut consumption frequency or amount                                                        | Relative risks (95% confidence intervals)                                                                                                                                                                                    | Adjustment for confounding factors                                                                                                                                                                                                                          |
|-----------------------------------|--------------------------------------|-------------------------------------|-----------------------------------------------------------|----------------------------------|-------------------------------------------------------------------------------------------------|--------------------------------------------------------------------------------------------|------------------------------------------------------------------------------------------------------------------------------------------------------------------------------------------------------------------------------|-------------------------------------------------------------------------------------------------------------------------------------------------------------------------------------------------------------------------------------------------------------|
| Bao Y et al, 2013, USA            | Nurses' Health Study                 | 1980-2010, 30 years follow-up       | 76464 women, age 34-59 years: 220 diabetes deaths         | Validated FFQ, 61-116 food items | Nuts<br><br>Peanuts<br><br>Tree nuts                                                            | Never<br><1/wk<br>1<br>2-4<br>≥5<br>Never<br><1/wk<br>1<br>≥2<br>Never<br><1/wk<br>1<br>≥2 | 1.00<br>0.86 (0.62-1.20)<br>0.68 (0.42-1.10)<br>0.70 (0.41-1.18)<br>0.83 (0.35-1.96)<br>1.00<br>0.76 (0.52-1.10)<br>1.08 (0.58-2.00)<br>0.98 (0.47-2.03)<br>1.00<br>0.68 (0.46-1.00)<br>0.98 (0.48-2.02)<br>1.15 (0.54-2.48) | Age, race, BMI, physical activity, smoking, screening, multivitamin use, aspirin use, FH – DM, MI or cancer, history of DM, hypertension, or hypercholesterolemia, total energy, alcohol, red or processed meat, fruits, vegetables, menopausal status, HRT |
| Bao Y et al, 2013, USA            | Health Professionals Follow-up Study | 1986-2010, 24 years follow-up       | 42498 men, age 45-70 years: 84 diabetes deaths            | Validated FFQ, 131 food items    | Nuts<br><br>Peanuts<br><br>Tree nuts                                                            | Never<br><1/wk<br>1<br>2-4<br>≥5<br>Never<br><1/wk<br>1<br>≥2<br>Never<br><1/wk<br>1<br>≥2 | 1.00<br>1.32 (0.65-2.65)<br>0.76 (0.34-1.68)<br>1.02 (0.49-2.12)<br>0.85 (0.35-2.11)<br>1.00<br>0.84 (0.47-1.51)<br>0.89 (0.43-1.84)<br>0.63 (0.31-1.28)<br>1.00<br>0.95 (0.54-1.66)<br>1.12 (0.53-2.37)<br>0.89 (0.42-1.89) | Age, race, BMI, physical activity, smoking, screening, multivitamin use, aspirin use, FH – DM, MI or cancer, history of DM, hypertension, or hypercholesterolemia, total energy, alcohol, red or processed meat, fruits, vegetables                         |
| Luu HN et al, 2015, USA           | Southern Community Cohort Study      | 2002-2009 - NA, 5.4 years follow-up | 71764 men and women, age 40-79 years: 338 diabetes deaths | FFQ, 89 food items               | Total nuts and peanut butter, African Americans<br><br>Total nuts and peanut butter, Caucasians | <0.95 g/d<br>0.95-<3.08<br>3.08-<7.30<br>7.30-<18.45<br>≥18.45<br><0.95 g/d<br>0.95-<3.08  | 1.00<br>0.81 (0.56-1.19)<br>0.84 (0.56-1.26)<br>0.78 (0.52-1.17)<br>0.55 (0.35-0.88)<br>1.00<br>1.00 (0.48-2.08)                                                                                                             | Age, sex, race, education, occupation, household income, marital status, smoking pack-years, alcohol, BMI, physical activity, vitamin supplement use, Charlson Comorbidity Index, metabolic conditions (hypertension, heart disease, DM, obesity,           |

|                                            |                               |                                      |                                                                             |                               |                                                                      |                                                                                                            |                                                                                                                                                                                                                  |                                                                                                                                                                                                                                                                                                                                          |
|--------------------------------------------|-------------------------------|--------------------------------------|-----------------------------------------------------------------------------|-------------------------------|----------------------------------------------------------------------|------------------------------------------------------------------------------------------------------------|------------------------------------------------------------------------------------------------------------------------------------------------------------------------------------------------------------------|------------------------------------------------------------------------------------------------------------------------------------------------------------------------------------------------------------------------------------------------------------------------------------------------------------------------------------------|
|                                            |                               |                                      |                                                                             |                               |                                                                      | 3.08-<7.30<br>7.30-<18.45<br>≥18.45                                                                        | 0.65 (0.29-1.46)<br>1.35 (0.68-2.67)<br>0.76 (0.34-1.70)                                                                                                                                                         | hypercholesterolemia), total energy, red meat, chicken and duck intake, seafood, vegetables, fruits                                                                                                                                                                                                                                      |
| Luu HN et al, 2015, China                  | Shanghai Men's Health Study   | 2002-2006 - NA, 6.5 years follow-up  | 61123 men, age 40-74 years: 125 diabetes deaths                             | Validated FFQ, 84 food items  | Peanuts                                                              | <0.14 g/d<br>0.14-<0.72<br>0.72-<1.45<br>1.45-<2.54<br>• 2.54                                              | 1.00<br>1.43 (0.74-2.74)<br>1.02 (0.56-1.85)<br>0.86 (0.50-1.47)<br>1.38 (0.83-2.30)                                                                                                                             | Age, race, education, occupation, household income, marital status, smoking pack-years, alcohol, BMI, physical activity, vitamin supplement use, Charlson Comorbidity Index, metabolic conditions (hypertension, heart disease, DM, obesity, dyslipidemia), total energy, red meat, chicken and duck intake, seafood, vegetables, fruits |
| Luu HN et al, 2015, China                  | Shanghai Women's Health Study | 1996-2000 - NA, 12.2 years follow-up | 73142 women, age 40-70 years: 314 diabetes deaths                           | Validated FFQ, 87 food items  | Peanuts                                                              | <0.14 g/d<br>0.14-<0.72<br>0.72-<1.45<br>1.45-<2.54<br>• 2.54                                              | 1.00<br>0.71 (0.51-1.00)<br>0.48 (0.33-0.70)<br>0.91 (0.67-1.25)<br>0.84 (0.59-1.20)                                                                                                                             | Age, race, education, occupation, household income, marital status, smoking pack-years, alcohol, BMI, physical activity, vitamin supplement use, Charlson Comorbidity Index, metabolic conditions (hypertension, heart disease, DM, obesity, dyslipidemia), total energy, red meat, chicken and duck intake, seafood, vegetables, fruits |
| van den Brandt PA et al, 2015, Netherlands | Netherlands Cohort Study      | 1986-1996, 10 years follow-up        | 3202 subcohort members, men and women, age 55-69 years: 158 diabetes deaths | Validated FFQ, 150 food items | Total nuts, all<br><br>Peanuts<br><br>Tree nuts<br><br>Peanut butter | 0 g/d<br>0.1-<5<br>5-<10<br>≥10<br>0 g/d<br>0.1-<5<br>≥5<br>0 g/d<br>0.1-<5<br>≥5<br>0 g/d<br>0.1-<5<br>≥5 | 1.00<br>0.45 (0.24-0.83)<br>0.22 (0.08-0.63)<br>0.70 (0.32-1.51)<br>1.00<br>0.40 (0.22-0.75)<br>0.45 (0.21-0.96)<br>1.00<br>0.79 (0.38-1.64)<br>2.00 (0.76-5.27)<br>1.00<br>0.68 (0.29-1.60)<br>0.56 (0.22-1.45) | Age, sex, cigarette smoking, number of cigarettes per day, years of smoking, hypertension, DM, body height, BMI, non-occupational physical activity, highest level of education, alcohol, vegetables, fruits, energy, nutritional supplement use, women: HRT                                                                             |

BMI=body mass index, DM=diabetes mellitus, FFQ=food frequency questionnaire, FH=family history, HRT=hormone replacement therapy, MI=myocardial infarction, NA=not available

Supplementary table 10. Nut consumption and neurodegenerative disease mortality

| Author, publication year, country          | Study name                           | Study period                  | Number of participants, gender, age, number of deaths                                       | Dietary assessment               | Exposure and subgroup                | Nut consumption frequency or amount                                                        | Relative risks (95% confidence intervals)                                                                                                                                                                                    | Adjustment for confounding factors                                                                                                                                                                                                                          |
|--------------------------------------------|--------------------------------------|-------------------------------|---------------------------------------------------------------------------------------------|----------------------------------|--------------------------------------|--------------------------------------------------------------------------------------------|------------------------------------------------------------------------------------------------------------------------------------------------------------------------------------------------------------------------------|-------------------------------------------------------------------------------------------------------------------------------------------------------------------------------------------------------------------------------------------------------------|
| Bao Y et al, 2013, USA                     | Nurses' Health Study                 | 1980-2010, 30 years follow-up | 76464 women, age 34-59 years: 1315 neurodegenerative disease deaths                         | Validated FFQ, 61-116 food items | Nuts<br><br>Peanuts<br><br>Tree nuts | Never<br><1/wk<br>1<br>2-4<br>≥5<br>Never<br><1/wk<br>1<br>≥2<br>Never<br><1/wk<br>1<br>≥2 | 1.00<br>1.07 (0.92-1.25)<br>1.04 (0.87-1.26)<br>0.88 (0.72-1.08)<br>0.95 (0.70-1.29)<br>1.00<br>1.08 (0.94-1.24)<br>1.03 (0.81-1.30)<br>0.91 (0.70-1.20)<br>1.00<br>1.06 (0.93-1.22)<br>0.65 (0.48-0.88)<br>0.81 (0.60-1.11) | Age, race, BMI, physical activity, smoking, screening, multivitamin use, aspirin use, FH – DM, MI or cancer, history of DM, hypertension, or hypercholesterolemia, total energy, alcohol, red or processed meat, fruits, vegetables, menopausal status, HRT |
| Bao Y et al, 2013, USA                     | Health Professionals Follow-up Study | 1986-2010, 24 years follow-up | 42498 men, age 45-70 years: 654 neurodegenerative disease deaths                            | Validated FFQ, 131 food items    | Nuts<br><br>Peanuts<br><br>Tree nuts | Never<br><1/wk<br>1<br>2-4<br>≥5<br>Never<br><1/wk<br>1<br>≥2<br>Never<br><1/wk<br>1<br>≥2 | 1.00<br>1.23 (0.94-1.59)<br>1.20 (0.92-1.57)<br>1.17 (0.90-1.53)<br>1.01 (0.74-1.39)<br>1.00<br>1.11 (0.90-1.38)<br>1.27 (0.98-1.64)<br>1.11 (0.87-1.42)<br>1.00<br>1.37 (1.13-1.67)<br>1.22 (0.93-1.59)<br>1.09 (0.83-1.42) | Age, race, BMI, physical activity, smoking, screening, multivitamin use, aspirin use, FH – DM, MI or cancer, history of DM, hypertension, or hypercholesterolemia, total energy, alcohol, red or processed meat, fruits, vegetables                         |
| van den Brandt PA et al, 2015, Netherlands | Netherlands Cohort Study             | 1986-1996, 10 years follow-up | 3202 subcohort members, men and women, age 55-69 years: 87 neurodegenerative disease deaths | Validated FFQ, 150 food items    | Total nuts, all<br><br>Peanuts       | 0 g/d<br>0.1-<5<br>5-<10<br>≥10<br>0 g/d<br>0.1-<5                                         | 1.00<br>0.64 (0.38-1.09)<br>0.36 (0.13-0.97)<br>0.53 (0.25-1.14)<br>1.00<br>0.70 (0.41-1.18)                                                                                                                                 | Age, sex, cigarette smoking, number of cigarettes per day, years of smoking, hypertension, DM, body height, BMI, non-occupational physical activity, highest level of education, alcohol, vegetables, fruits, energy, nutritional                           |

|  |  |  |  |  |               |        |                  |                            |
|--|--|--|--|--|---------------|--------|------------------|----------------------------|
|  |  |  |  |  | Tree nuts     | ≥5     | 0.56 (0.28-1.15) | supplement use, women: HRT |
|  |  |  |  |  |               | 0 g/d  | 1.00             |                            |
|  |  |  |  |  |               | 0.1-<5 | 0.97 (0.56-1.68) |                            |
|  |  |  |  |  | Peanut butter | ≥5     | 0.68 (0.20-2.37) |                            |
|  |  |  |  |  |               | 0 g/d  | 1.00             |                            |
|  |  |  |  |  |               | 0.1-<5 | 1.01 (0.53-1.91) |                            |
|  |  |  |  |  |               | ≥5     | 0.98 (0.44-2.19) |                            |

BMI=body mass index, DM=diabetes mellitus, FFQ=food frequency questionnaire, FH=family history, HRT=hormone replacement therapy, MI=myocardial infarction

Supplementary table 11. Nut consumption and infectious disease mortality

| Author, publication year, country | Study name                           | Study period                  | Number of participants, gender, age, number of deaths       | Dietary assessment               | Exposure and subgroup                | Nut consumption frequency or amount                                                        | Relative risks (95% confidence intervals)                                                                                                                                                                                    | Adjustment for confounding factors                                                                                                                                                                                                                          |
|-----------------------------------|--------------------------------------|-------------------------------|-------------------------------------------------------------|----------------------------------|--------------------------------------|--------------------------------------------------------------------------------------------|------------------------------------------------------------------------------------------------------------------------------------------------------------------------------------------------------------------------------|-------------------------------------------------------------------------------------------------------------------------------------------------------------------------------------------------------------------------------------------------------------|
| Bao Y et al, 2013, USA            | Nurses' Health Study                 | 1980-2010, 30 years follow-up | 76464 women, age 34-59 years: 217 infectious disease deaths | Validated FFQ, 61-116 food items | Nuts<br><br>Peanuts<br><br>Tree nuts | Never<br><1/wk<br>1<br>2-4<br>≥5<br>Never<br><1/wk<br>1<br>≥2<br>Never<br><1/wk<br>1<br>≥2 | 1.00<br>0.97 (0.68-1.40)<br>0.79 (0.49-1.25)<br>0.71 (0.43-1.18)<br>0.65 (0.28-1.56)<br>1.00<br>0.71 (0.51-1.00)<br>0.44 (0.22-0.88)<br>0.67 (0.36-1.26)<br>1.00<br>0.90 (0.64-1.27)<br>0.58 (0.29-1.18)<br>0.67 (0.32-1.43) | Age, race, BMI, physical activity, smoking, screening, multivitamin use, aspirin use, FH – DM, MI or cancer, history of DM, hypertension, or hypercholesterolemia, total energy, alcohol, red or processed meat, fruits, vegetables, menopausal status, HRT |
| Bao Y et al, 2013, USA            | Health Professionals Follow-up Study | 1986-2010, 24 years follow-up | 42498 men, age 45-70 years: 180 infectious disease deaths   | Validated FFQ, 131 food items    | Nuts<br><br>Peanuts<br><br>Tree nuts | Never<br><1/wk<br>1<br>2-4<br>≥5<br>Never<br><1/wk<br>1<br>≥2<br>Never<br><1/wk<br>1<br>≥2 | 1.00<br>1.28 (0.79-2.05)<br>0.96 (0.58-1.60)<br>0.91 (0.55-1.51)<br>0.84 (0.44-1.58)<br>1.00<br>0.98 (0.67-1.45)<br>0.90 (0.55-1.46)<br>0.68 (0.42-1.12)<br>1.00<br>1.13 (0.79-1.63)<br>1.17 (0.73-1.89)<br>0.76 (0.44-1.31) | Age, race, BMI, physical activity, smoking, screening, multivitamin use, aspirin use, FH – DM, MI or cancer, history of DM, hypertension, or hypercholesterolemia, total energy, alcohol, red or processed meat, fruits, vegetables                         |

BMI=body mass index, DM=diabetes mellitus, FFQ=food frequency questionnaire, FH=family history, MI=myocardial infarction

Supplementary table 12. Nut consumption and kidney disease mortality

| Author, publication year, country | Study name                           | Study period                  | Number of participants, gender, age, number of deaths   | Dietary assessment               | Exposure and subgroup                | Nut consumption frequency or amount                                                        | Relative risks (95% confidence intervals)                                                                                                                                                                                    | Adjustment for confounding factors                                                                                                                                                                                                                          |
|-----------------------------------|--------------------------------------|-------------------------------|---------------------------------------------------------|----------------------------------|--------------------------------------|--------------------------------------------------------------------------------------------|------------------------------------------------------------------------------------------------------------------------------------------------------------------------------------------------------------------------------|-------------------------------------------------------------------------------------------------------------------------------------------------------------------------------------------------------------------------------------------------------------|
| Bao Y et al, 2013, USA            | Nurses' Health Study                 | 1980-2010, 30 years follow-up | 76464 women, age 34-59 years: 191 kidney disease deaths | Validated FFQ, 61-116 food items | Nuts<br><br>Peanuts<br><br>Tree nuts | Never<br><1/wk<br>1<br>2-4<br>≥5<br>Never<br><1/wk<br>1<br>≥2<br>Never<br><1/wk<br>1<br>≥2 | 1.00<br>0.92 (0.63-1.33)<br>0.83 (0.51-1.35)<br>0.95 (0.57-1.60)<br>0.89 (0.37-2.11)<br>1.00<br>0.86 (0.59-1.25)<br>0.71 (0.36-1.40)<br>0.75 (0.37-1.54)<br>1.00<br>0.96 (0.66-1.39)<br>0.95 (0.46-1.94)<br>0.84 (0.35-1.98) | Age, race, BMI, physical activity, smoking, screening, multivitamin use, aspirin use, FH – DM, MI or cancer, history of DM, hypertension, or hypercholesterolemia, total energy, alcohol, red or processed meat, fruits, vegetables, menopausal status, HRT |
| Bao Y et al, 2013, USA            | Health Professionals Follow-up Study | 1986-2010, 24 years follow-up | 42498 men, age 45-70 years: 176 kidney disease deaths   | Validated FFQ, 131 food items    | Nuts<br><br>Peanuts<br><br>Tree nuts | Never<br><1/wk<br>1<br>2-4<br>≥5<br>Never<br><1/wk<br>1<br>≥2<br>Never<br><1/wk<br>1<br>≥2 | 1.00<br>0.84 (0.54-1.31)<br>0.91 (0.58-1.43)<br>0.52 (0.31-0.86)<br>0.49 (0.26-0.92)<br>1.00<br>0.76 (0.52-1.09)<br>0.82 (0.51-1.31)<br>0.39 (0.23-0.66)<br>1.00<br>0.74 (0.52-1.06)<br>1.00 (0.62-1.62)<br>0.58 (0.33-1.00) | Age, race, BMI, physical activity, smoking, screening, multivitamin use, aspirin use, FH – DM, MI or cancer, history of DM, hypertension, or hypercholesterolemia, total energy, alcohol, red or processed meat, fruits, vegetables                         |

BMI=body mass index, DM=diabetes mellitus, FFQ=food frequency questionnaire, FH=family history, HRT=hormone replacement therapy, MI=myocardial infarction

Supplementary table 13. Nut consumption and inflammatory disease mortality

| Author, publication year, country | Study name               | Study period                         | Number of participants, gender, age, number of deaths                    | Dietary assessment  | Exposure and subgroup | Nut consumption frequency or amount      | Relative risks (95% confidence intervals)    | Adjustment for confounding factors                                                                                                                          |
|-----------------------------------|--------------------------|--------------------------------------|--------------------------------------------------------------------------|---------------------|-----------------------|------------------------------------------|----------------------------------------------|-------------------------------------------------------------------------------------------------------------------------------------------------------------|
| Gopinath B et al, 2011, Australia | Blue Mountains Eye Study | 1992-1994 - 2007, 15 years follow-up | 2514 men and women, age $\geq$ 49 years: 214 inflammatory disease deaths | FFQ, 145 food items | Nuts                  | 0.00-0.90 g/d<br>1.40-4.55<br>4.90-100.0 | 1.00<br>0.49 (0.33-0.72)<br>0.68 (0.48-0.98) | Age, sex, current smoking, alcohol, poor self-rated health, BMI, diabetes, total fiber, glycemic index, use of corticosteroid drugs, white blood cell count |



Supplementary Table 14. Relative risks from nonlinear dose-response analysis of peanuts and coronary heart disease, stroke, cardiovascular disease, total cancer, and all-cause mortality

|                           | Coronary heart disease  |                  |                  | Stroke                  |                  |                  | Cardiovascular disease  |                  |                  |
|---------------------------|-------------------------|------------------|------------------|-------------------------|------------------|------------------|-------------------------|------------------|------------------|
|                           | Incidence/<br>mortality | Incidence        | Mortality        | Incidence/<br>mortality | Incidence        | Mortality        | Incidence/<br>mortality | Incidence        | Mortality        |
| g/d                       | RR (95% CI)             | RR (95% CI)      | RR (95% CI)      | RR (95% CI)             | RR (95% CI)      | RR (95% CI)      | RR (95% CI)             | RR (95% CI)      | RR (95% CI)      |
| 0                         | 1.00                    | 1.00             | 1.00             | 1.00                    | 1.00             | 1.00             | 1.00                    | 1.00             | 1.00             |
| 5                         | 0.89 (0.87-0.90)        | 0.88 (0.84-0.94) | 0.88 (0.86-0.90) | 0.94 (0.92-0.96)        | 0.96 (0.93-0.99) | 0.97 (0.92-1.01) | 0.88 (0.87-0.90)        | 0.88 (0.83-0.92) | 0.88 (0.87-0.89) |
| 10                        | 0.82 (0.79-0.84)        | 0.83 (0.77-0.88) | 0.81 (0.78-0.83) | 0.92 (0.89-0.95)        | 0.95 (0.92-0.99) | 0.95 (0.90-1.01) | 0.83 (0.81-0.84)        | 0.85 (0.80-0.91) | 0.82 (0.80-0.84) |
| 15                        | 0.78 (0.76-0.81)        | 0.81 (0.76-0.86) | 0.77 (0.74-0.79) | 0.94 (0.91-0.97)        | 0.96 (0.92-1.00) | 0.96 (0.90-1.02) | 0.81 (0.79-0.83)        | 0.87 (0.82-0.93) | 0.80 (0.79-0.82) |
| 20                        | 0.77 (0.74-0.79)        | 0.81 (0.74-0.89) | 0.75 (0.72-0.77) | 0.97 (0.94-1.01)        | 0.97 (0.92-1.02) | 0.97 (0.91-1.04) | 0.82 (0.81-0.84)        | 0.89 (0.84-0.95) | 0.81 (0.80-0.83) |
| 25                        | 0.76 (0.73-0.79)        | 0.83 (0.70-0.98) | 0.74 (0.71-0.77) | 1.02 (0.98-1.07)        | 0.98 (0.91-1.04) | 0.99 (0.91-1.08) | 0.85 (0.83-0.87)        |                  | 0.84 (0.82-0.86) |
| 28                        | 0.75 (0.71-0.80)        | 0.84 (0.68-1.05) | 0.73 (0.70-0.77) | 1.05 (1.00-1.12)        | 0.98 (0.91-1.06) |                  | 0.86 (0.84-0.89)        |                  | 0.85 (0.83-0.88) |
| P <sub>nonlinearity</sub> | <0.0001                 | 0.04             | <0.0001          | <0.0001                 | 0.05             | 0.18             | <0.0001                 | <0.0001          | <0.0001          |

Supplementary Table 15. Relative risks from nonlinear dose-response analysis of peanuts and mortality from total cancer, all causes, respiratory disease, diabetes, neurodegenerative disease.

|                           | Total cancer     | All-cause mortality | Respiratory disease | Diabetes         | Neurodegenerative disease |
|---------------------------|------------------|---------------------|---------------------|------------------|---------------------------|
| g/d                       | RR (95% CI)      | RR (95% CI)         | RR (95% CI)         | RR (95% CI)      | RR (95% CI)               |
| 0                         | 1.00             | 1.00                | 1.00                | 1.00             | 1.00                      |
| 5                         | 0.93 (0.91-0.96) | 0.89 (0.87-0.91)    | 0.78 (0.69-0.90)    | 0.80 (0.69-0.93) | 0.99 (0.93-1.06)          |
| 10                        | 0.90 (0.86-0.94) | 0.84 (0.81-0.87)    | 0.72 (0.63-0.82)    | 0.72 (0.60-0.86) | 0.82 (0.75-0.90)          |
| 15                        | 0.88 (0.85-0.92) | 0.82 (0.79-0.85)    | 0.67 (0.56-0.80)    | 0.71 (0.62-0.82) | 0.67 (0.55-0.80)          |
| 20                        | 0.88 (0.85-0.91) | 0.82 (0.80-0.84)    | 0.63 (0.49-0.81)    | 0.74 (0.63-0.86) | 0.55 (0.42-0.73)          |
| 25                        | 0.89 (0.85-0.92) | 0.84 (0.82-0.85)    | -                   | 0.76 (0.60-0.97) | -                         |
| 28                        | -                | 0.85 (0.83-0.86)    | -                   | -                | -                         |
| P <sub>nonlinearity</sub> | 0.003            | <0.0001             | 0.10                | 0.07             | 0.009                     |

Supplementary table 16: Subgroup analyses of nuts and coronary heart disease, stroke, and cardiovascular disease, per 28 grams per day

|                                    | Coronary heart disease |                  |                       |                                    |                                    | Stroke   |                  |                       |                                    |                                    | Cardiovascular disease |                  |                       |                                    |                                    |      |
|------------------------------------|------------------------|------------------|-----------------------|------------------------------------|------------------------------------|----------|------------------|-----------------------|------------------------------------|------------------------------------|------------------------|------------------|-----------------------|------------------------------------|------------------------------------|------|
|                                    | <i>n</i>               | RR (95% CI)      | <i>I</i> <sup>2</sup> | <i>P</i> <sub>h</sub> <sup>1</sup> | <i>P</i> <sub>h</sub> <sup>2</sup> | <i>n</i> | RR (95% CI)      | <i>I</i> <sup>2</sup> | <i>P</i> <sub>h</sub> <sup>1</sup> | <i>P</i> <sub>h</sub> <sup>2</sup> | <i>n</i>               | RR (95% CI)      | <i>I</i> <sup>2</sup> | <i>P</i> <sub>h</sub> <sup>1</sup> | <i>P</i> <sub>h</sub> <sup>2</sup> |      |
| All studies                        | 11                     | 0.71 (0.63-0.80) | 47.4                  | 0.04                               |                                    | 11       | 0.93 (0.83-1.05) | 13.7                  | 0.31                               |                                    | 12                     | 0.79 (0.70-0.88) | 59.6                  | 0.004                              |                                    |      |
| Duration of follow-up              |                        |                  |                       |                                    |                                    |          |                  |                       |                                    |                                    |                        |                  |                       |                                    |                                    |      |
| <10 yrs follow-up                  | 2                      | 0.57 (0.47-0.69) | 0                     | 0.42                               | 0.05                               | 3        | 0.94 (0.74-1.18) | 0                     | 0.39                               | 0.77                               | 5                      | 0.67 (0.54-0.84) | 46.6                  | 0.11                               | 0.09                               |      |
| ≥10 yrs follow-up                  | 9                      | 0.75 (0.67-0.84) | 30.5                  | 0.18                               |                                    | 8        | 0.92 (0.79-1.07) | 27.6                  | 0.21                               |                                    | 7                      | 0.85 (0.76-0.95) | 47.7                  | 0.08                               |                                    |      |
| Outcome                            |                        |                  |                       |                                    |                                    |          |                  |                       |                                    |                                    |                        |                  |                       |                                    |                                    |      |
| Incidence                          | 4                      | 0.80 (0.65-0.99) | 54.8                  | 0.09                               | 0.05                               | 6        | 0.96 (0.82-1.11) | 35.1                  | 0.17                               | 0.92                               | 4                      | 0.83 (0.64-1.08) | 50.2                  | 0.11                               | 0.48                               |      |
| Mortality                          | 9                      | 0.69 (0.63-0.75) | 0                     | 0.54                               |                                    | 7        | 0.95 (0.79-1.15) | 0                     | 0.64                               |                                    | 9                      | 0.76 (0.67-0.86) | 64.9                  | 0.004                              |                                    |      |
| Outcome subtype                    |                        |                  |                       |                                    |                                    |          |                  |                       |                                    |                                    |                        |                  |                       |                                    |                                    |      |
| Myocardial infarction              | 2                      | 0.63 (0.35-1.13) | 57.7                  | 0.12                               | 0.87                               | -        |                  |                       |                                    | -                                  | -                      |                  |                       |                                    | -                                  |      |
| Coronary heart disease             | 10                     | 0.67 (0.57-0.79) | 65.8                  | 0.002                              |                                    | -        |                  |                       |                                    |                                    | -                      |                  |                       |                                    |                                    |      |
| Ischemic stroke                    | -                      |                  |                       |                                    | -                                  | 6        | 1.01 (0.88-1.17) | 15.1                  | 0.32                               | 0.46                               | -                      |                  |                       |                                    | -                                  |      |
| Hemorrhagic stroke                 | -                      |                  |                       |                                    |                                    | 5        | 1.15 (0.86-1.54) | 9.1                   | 0.35                               |                                    | -                      |                  |                       |                                    |                                    |      |
| Gender                             |                        |                  |                       |                                    |                                    |          |                  |                       |                                    |                                    |                        |                  |                       |                                    |                                    |      |
| Men                                | 4                      | 0.70 (0.62-0.80) | 0                     | 0.79                               | 0.74/<br>0.96                      | 5        | 1.07 (0.74-1.55) | 58.5                  | 0.05                               | 0.48/<br>0.23                      | 5                      | 0.73 (0.66-0.81) | 0                     | 0.79                               | 0.75<br>/                          |      |
| Women                              | 4                      | 0.71 (0.61-0.82) | 0                     | 0.80                               |                                    | 6        | 0.88 (0.78-1.00) | 16.2                  | 0.31                               |                                    | 6                      | 0.86 (0.72-1.03) | 62.1                  | 0.02                               |                                    |      |
| Men and women                      | 5                      | 0.69 (0.52-0.91) | 75.7                  | 0.002                              |                                    | 2        | 1.08 (0.66-1.78) | 0                     | 0.32                               |                                    | 4                      | 0.72 (0.54-0.95) | 40.7                  | 0.17                               | 0.02                               |      |
| Geographic location                |                        |                  |                       |                                    |                                    |          |                  |                       |                                    |                                    |                        |                  |                       |                                    |                                    |      |
| Europe                             | 2                      | 0.74 (0.60-0.92) | 0                     | 0.96                               | 0.72                               | 2        | 0.94 (0.44-2.02) | 62.8                  | 0.10                               | 0.77                               | 3                      | 0.73 (0.50-1.06) | 57.6                  | 0.10                               | 0.60                               |      |
| America                            | 6                      | 0.68 (0.62-0.75) | 0                     | 0.47                               |                                    | 7        | 0.95 (0.83-1.09) | 24.6                  | 0.24                               |                                    | 6                      | 0.83 (0.73-0.93) | 66.9                  | 0.01                               |                                    |      |
| Asia                               | 1                      | 0.31 (0.13-0.81) |                       |                                    |                                    | 1        | 0.90 (0.48-1.64) |                       |                                    |                                    | 2                      | 0.55 (0.39-0.78) | 0                     | 0.41                               |                                    |      |
| Australia                          | 1                      | 0.98 (0.38-2.53) |                       |                                    |                                    | 1        | 0.75 (0.17-3.25) |                       |                                    |                                    | 1                      | 0.79 (0.35-1.79) |                       |                                    |                                    |      |
| Number of cases                    |                        |                  |                       |                                    |                                    |          |                  |                       |                                    |                                    |                        |                  |                       |                                    |                                    |      |
| Cases <500                         | 3                      | 0.64 (0.37-1.10) | 47.4                  | 0.15                               | 0.21                               | 5        | 1.01 (0.73-1.41) | 0                     | 0.63                               | 0.59                               | 2                      | 0.67 (0.29-1.55) | 78.7                  | 0.03                               | 0.40                               |      |
| Cases 500-<1000                    | 3                      | 0.62 (0.53-0.74) | 24.5                  | 0.27                               |                                    | 2        | 0.90 (0.58-1.38) | 70.6                  | 0.07                               |                                    | 3                      | 0.67 (0.52-0.87) | 0                     | 0.92                               |                                    |      |
| Cases ≥1000                        | 5                      | 0.77 (0.68-0.88) | 40.8                  | 0.15                               |                                    | 4        | 0.90 (0.75-1.08) | 42.6                  | 0.16                               |                                    | 7                      | 0.81 (0.72-0.92) | 68.5                  | 0.004                              |                                    |      |
| Study quality                      |                        |                  |                       |                                    |                                    |          |                  |                       |                                    |                                    |                        |                  |                       |                                    |                                    |      |
| 0-3 stars                          | 0                      |                  |                       |                                    | 0.60                               | 0        |                  |                       |                                    | 0.93                               | 0                      |                  |                       |                                    | 0.32                               |      |
| 4-6                                | 2                      | 0.53 (0.23-1.22) | 69.0                  | 0.07                               |                                    | 1        | 0.90 (0.48-1.64) |                       |                                    |                                    | 2                      | 0.66 (0.50-0.87) | 0                     | 0.88                               |                                    |      |
| 7-9                                | 9                      | 0.72 (0.64-0.81) | 48.3                  | 0.05                               |                                    | 10       | 0.93 (0.82-1.06) | 22.1                  | 0.24                               |                                    | 10                     | 0.80 (0.71-0.91) | 62.9                  | 0.004                              |                                    |      |
| Adjustment for confounding factors |                        |                  |                       |                                    |                                    |          |                  |                       |                                    |                                    |                        |                  |                       |                                    |                                    |      |
| Age                                | Yes                    | 11               | 0.71 (0.63-0.80)      | 47.4                               | 0.04                               | NC       | 11               | 0.93 (0.83-1.05)      | 13.7                               | 0.31                               | NC                     | 12               | 0.79 (0.70-0.88)      | 59.6                               | 0.004                              | NC   |
|                                    | No                     | 0                |                       |                                    | 0                                  |          |                  |                       |                                    | 0                                  |                        |                  |                       |                                    |                                    |      |
| Education                          | Yes                    | 4                | 0.79 (0.61-1.01)      | 59.7                               | 0.06                               | 0.20     | 7                | 0.94 (0.79-1.12)      | 10.9                               | 0.35                               | 0.89                   | 6                | 0.79 (0.66-0.96)      | 50.2                               | 0.07                               | 0.86 |
|                                    | No                     | 7                | 0.68 (0.61-0.76)      | 18.0                               | 0.29                               |          | 4                | 0.92 (0.75-1.12)      | 38.0                               | 0.18                               |                        | 6                | 0.78 (0.67-0.91)      | 68.4                               | 0.007                              |      |

|                                         |     |    |                  |      |       |      |    |                  |      |      |      |    |                  |      |       |      |
|-----------------------------------------|-----|----|------------------|------|-------|------|----|------------------|------|------|------|----|------------------|------|-------|------|
| Family history of CHD                   | Yes | 2  | 0.72 (0.63-0.81) | 0    | 0.84  | 0.94 | 2  | 0.81 (0.66-1.01) | 5.8  | 0.30 | 0.18 | 2  | 0.78 (0.70-0.87) | 0    | 0.41  | 0.89 |
|                                         | No  | 9  | 0.70 (0.59-0.83) | 57.7 | 0.02  |      | 9  | 0.99 (0.88-1.12) | 0    | 0.44 |      | 10 | 0.77 (0.66-0.90) | 63.3 | 0.004 |      |
| Body mass index                         | Yes | 10 | 0.71 (0.62-0.80) | 52.6 | 0.03  | 0.85 | 11 | 0.93 (0.83-1.05) | 13.7 | 0.31 | NC   | 11 | 0.77 (0.68-0.86) | 59.1 | 0.007 | 0.15 |
|                                         | No  | 1  | 0.74 (0.54-1.01) |      |       |      | 0  |                  |      |      |      | 1  | 1.04 (0.80-1.36) |      |       |      |
| Smoking                                 | Yes | 10 | 0.71 (0.62-0.81) | 52.5 | 0.03  | 0.99 | 11 | 0.93 (0.83-1.05) | 13.7 | 0.31 | NC   | 11 | 0.76 (0.69-0.85) | 36.1 | 0.11  | 0.02 |
|                                         | No  | 1  | 0.71 (0.57-0.89) |      |       |      | 0  |                  |      |      |      | 1  | 0.94 (0.86-1.02) |      |       |      |
| Alcohol                                 | Yes | 9  | 0.73 (0.65-0.83) | 40.8 | 0.10  | 0.27 | 11 | 0.93 (0.83-1.05) | 13.7 | 0.31 | NC   | 12 | 0.79 (0.70-0.88) | 59.6 | 0.004 | NC   |
|                                         | No  | 2  | 0.62 (0.44-0.86) | 59.5 | 0.12  |      | 0  |                  |      |      |      | 0  |                  |      |       |      |
| Physical activity                       | Yes | 8  | 0.71 (0.63-0.81) | 53.6 | 0.04  | 0.80 | 9  | 0.93 (0.81-1.07) | 30.2 | 0.18 | 0.85 | 10 | 0.79 (0.70-0.89) | 65.6 | 0.002 | 0.59 |
|                                         | No  | 3  | 0.64 (0.37-1.10) | 47.4 | 0.15  |      | 2  | 0.88 (0.50-1.55) | 0    | 0.81 |      | 2  | 0.68 (0.44-1.05) | 0    | 0.68  |      |
| Hypertension                            | Yes | 8  | 0.72 (0.62-0.83) | 54.6 | 0.03  | 0.70 | 8  | 0.99 (0.86-1.14) | 11.3 | 0.34 | 0.18 | 9  | 0.75 (0.68-0.82) | 18.5 | 0.28  | 0.00 |
|                                         | No  | 3  | 0.67 (0.51-0.88) | 39.5 | 0.19  |      | 3  | 0.82 (0.68-1.00) | 0    | 0.56 |      | 3  | 0.93 (0.81-1.08) | 27.4 | 0.25  |      |
| Hypercholesterolemia, serum cholesterol | Yes | 5  | 0.75 (0.64-0.87) | 56.4 | 0.06  | 0.34 | 4  | 1.01 (0.85-1.19) | 0    | 0.45 | 0.33 | 5  | 0.77 (0.68-0.85) | 31.4 | 0.21  | 0.69 |
|                                         | No  | 6  | 0.66 (0.55-0.79) | 32.9 | 0.19  |      | 7  | 0.87 (0.73-1.04) | 25.2 | 0.24 |      | 7  | 0.79 (0.66-0.95) | 59.8 | 0.02  |      |
| Coffee, caffeine                        | Yes | 0  |                  |      |       | NC   | 0  |                  |      |      | NC   | 1  | 1.00 (0.62-1.55) |      |       | 0.42 |
|                                         | No  | 11 | 0.71 (0.63-0.80) | 47.4 | 0.04  |      | 11 | 0.93 (0.83-1.05) | 13.7 | 0.31 |      | 11 | 0.78 (0.69-0.87) | 62.4 | 0.003 |      |
| Sugar-sweetened beverages               | Yes | 0  |                  |      |       | NC   | 0  |                  |      |      | NC   | 1  | 1.00 (0.62-1.55) |      |       | 0.42 |
|                                         | No  | 11 | 0.71 (0.63-0.80) | 47.4 | 0.04  |      | 11 | 0.93 (0.83-1.05) | 13.7 | 0.31 |      | 11 | 0.78 (0.69-0.87) | 62.4 | 0.003 |      |
| Red or processed meat                   | Yes | 6  | 0.70 (0.64-0.78) | 0    | 0.91  | 0.83 | 6  | 0.95 (0.80-1.13) | 19.9 | 0.28 | 0.69 | 9  | 0.77 (0.67-0.88) | 65.3 | 0.003 | 0.58 |
|                                         | No  | 5  | 0.69 (0.52-0.91) | 75.7 | 0.002 |      | 5  | 0.90 (0.74-1.10) | 22.7 | 0.27 |      | 3  | 0.84 (0.64-1.09) | 51.5 | 0.13  |      |
| Fish                                    | Yes | 4  | 0.68 (0.59-0.80) | 0    | 0.74  | 0.76 | 7  | 0.94 (0.79-1.12) | 20.4 | 0.27 | 0.77 | 6  | 0.74 (0.59-0.94) | 72.3 | 0.003 | 0.81 |
|                                         | No  | 7  | 0.71 (0.60-0.84) | 64.7 | 0.009 |      | 4  | 0.91 (0.75-1.11) | 24.0 | 0.27 |      | 6  | 0.80 (0.71-0.89) | 23.9 | 0.25  |      |
| Fruits and vegetables                   | Yes | 7  | 0.71 (0.64-0.78) | 0    | 0.95  | 0.95 | 7  | 0.91 (0.77-1.08) | 28.9 | 0.21 | 0.77 | 10 | 0.77 (0.68-0.87) | 61.6 | 0.005 | 0.40 |
|                                         | No  | 4  | 0.66 (0.45-0.96) | 81.8 | 0.001 |      | 4  | 0.97 (0.81-1.16) | 0.3  | 0.39 |      | 2  | 0.86 (0.54-1.37) | 63.7 | 0.10  |      |
| Whole grains                            | Yes | 2  | 0.62 (0.46-0.84) | 62.0 | 0.11  | 0.25 | 5  | 0.93 (0.73-1.18) | 45.3 | 0.12 | 0.91 | 2  | 0.94 (0.86-1.02) | 0    | 0.79  | 0.01 |
|                                         | No  | 9  | 0.74 (0.65-0.84) | 39.8 | 0.10  |      | 6  | 0.94 (0.80-1.09) | 0    | 0.52 |      | 10 | 0.75 (0.68-0.84) | 37.3 | 0.11  |      |
| Dairy                                   | Yes | 2  | 0.74 (0.52-1.05) | 0    | 0.53  | 0.78 | 4  | 0.91 (0.74-1.13) | 39.0 | 0.18 | 0.87 | 3  | 0.72 (0.43-1.19) | 57.6 | 0.10  | 0.63 |
|                                         | No  | 9  | 0.70 (0.62-0.80) | 56.9 | 0.02  |      | 7  | 0.94 (0.80-1.11) | 9.9  | 0.35 |      | 9  | 0.80 (0.71-0.89) | 62.9 | 0.006 |      |
| Energy intake                           | Yes | 7  | 0.75 (0.67-0.84) | 38.1 | 0.14  | 0.15 | 9  | 0.89 (0.78-1.03) | 11.9 | 0.34 | 0.25 | 11 | 0.79 (0.71-0.89) | 61.8 | 0.004 | 0.53 |
|                                         | No  | 4  | 0.61 (0.47-0.79) | 43.5 | 0.15  |      | 2  | 1.07 (0.88-1.30) | 0    | 0.57 |      | 1  | 0.64 (0.39-1.07) |      |       |      |

*n* denotes the number of studies.

<sup>1</sup> P for heterogeneity within each subgroup,

<sup>2</sup> P for heterogeneity between subgroups with meta-regression analysis,

<sup>3</sup> P for heterogeneity between men and women (studies with genders mixed were excluded),

NC = not calculable

Supplementary table 17: Subgroup analyses of nuts and total cancer and all-cause mortality, per 28 grams per day

|                                    | Total cancer |                  |                       |                                    |                                    | All-cause mortality |                  |                       |                                    |                                    |      |
|------------------------------------|--------------|------------------|-----------------------|------------------------------------|------------------------------------|---------------------|------------------|-----------------------|------------------------------------|------------------------------------|------|
|                                    | <i>n</i>     | RR (95% CI)      | <i>I</i> <sup>2</sup> | <i>P</i> <sub>h</sub> <sup>1</sup> | <i>P</i> <sub>h</sub> <sup>2</sup> | <i>n</i>            | RR (95% CI)      | <i>I</i> <sup>2</sup> | <i>P</i> <sub>h</sub> <sup>1</sup> | <i>P</i> <sub>h</sub> <sup>2</sup> |      |
| All studies                        | 8            | 0.85 (0.76-0.94) | 41.8                  | 0.10                               |                                    | 16                  | 0.78 (0.72-0.84) | 66.0                  | <0.0001                            |                                    |      |
| Duration of follow-up              |              |                  |                       |                                    |                                    |                     |                  |                       |                                    |                                    |      |
| <10 yrs follow-up                  | 5            | 0.82 (0.66-1.01) | 51.2                  | 0.09                               | 0.84                               | 7                   | 0.61 (0.49-0.76) | 72.2                  | 0.001                              | 0.03                               |      |
| ≥10 yrs follow-up                  | 3            | 0.86 (0.77-0.97) | 44.1                  | 0.17                               |                                    | 9                   | 0.84 (0.79-0.90) | 43.4                  | 0.08                               |                                    |      |
| Outcome                            |              |                  |                       |                                    |                                    |                     |                  |                       |                                    |                                    |      |
| Incidence                          | 1            | 1.06 (0.79-1.32) |                       |                                    | 0.22                               | -                   | -                | -                     | -                                  | -                                  |      |
| Mortality                          | 7            | 0.83 (0.75-0.92) | 36.3                  | 0.15                               |                                    | 16                  | 0.78 (0.72-0.84) | 66.0                  | <0.0001                            |                                    |      |
| Gender                             |              |                  |                       |                                    |                                    |                     |                  |                       |                                    |                                    |      |
| Men                                | 4            | 0.87 (0.78-0.97) | 0                     | 0.53                               | 0.68/<br>0.93                      | 8                   | 0.76 (0.70-0.83) | 25.3                  | 0.23                               | 0.70/<br>0.67                      |      |
| Women                              | 3            | 0.82 (0.61-1.09) | 59.6                  | 0.08                               |                                    | 8                   | 0.76 (0.64-0.88) | 79.8                  | <0.0001                            |                                    |      |
| Men and women                      | 2            | 0.83 (0.48-1.44) | 73.2                  | 0.05                               |                                    | 6                   | 0.74 (0.58-0.95) | 59.9                  | 0.03                               |                                    |      |
| Geographic location                |              |                  |                       |                                    |                                    |                     |                  |                       |                                    |                                    |      |
| Europe                             | 3            | 0.80 (0.58-1.10) | 69.9                  | 0.04                               | 0.99                               | 6                   | 0.70 (0.56-0.89) | 62.4                  | 0.02                               | 0.96                               |      |
| America                            | 4            | 0.88 (0.82-0.95) | 0                     | 0.72                               |                                    | 7                   | 0.82 (0.77-0.88) | 55.4                  | 0.04                               |                                    |      |
| Asia                               | 1            | 0.41 (0.18-0.91) |                       |                                    |                                    | 2                   | 0.62 (0.29-1.31) | 90.7                  | 0.001                              |                                    |      |
| Australia                          | 0            |                  |                       |                                    |                                    | 1                   | 0.82 (0.37-1.79) |                       |                                    |                                    |      |
| Number of cases                    |              |                  |                       |                                    |                                    |                     |                  |                       |                                    |                                    |      |
| Cases <500                         | 1            | 0.60 (0.36-1.00) |                       |                                    | 0.80                               | 5                   | 0.60 (0.46-0.79) | 27.4                  | 0.24                               | 0.11                               |      |
| Cases 500-<1000                    | 3            | 0.85 (0.60-1.21) | 61.8                  | 0.07                               |                                    | 0                   |                  |                       |                                    |                                    |      |
| Cases ≥1000                        | 4            | 0.85 (0.78-0.94) | 30.4                  | 0.23                               |                                    | 11                  | 0.80 (0.74-0.87) | 68.9                  | <0.0001                            |                                    |      |
| Study quality                      |              |                  |                       |                                    |                                    |                     |                  |                       |                                    |                                    |      |
| 0-3 stars                          | 0            |                  |                       |                                    | 0.92                               | 0                   |                  |                       |                                    | 0.88                               |      |
| 4-6                                | 1            | 0.87 (0.65-1.16) |                       |                                    |                                    | 4                   | 0.75 (0.66-0.86) | 0                     | 0.44                               |                                    |      |
| 7-9                                | 7            | 0.84 (0.75-0.95) | 50.1                  | 0.06                               |                                    | 12                  | 0.78 (0.71-0.86) | 72.3                  | <0.0001                            |                                    |      |
| Adjustment for confounding factors |              |                  |                       |                                    |                                    |                     |                  |                       |                                    |                                    |      |
| Age                                | Yes          | 8                | 0.85 (0.76-0.94)      | 41.8                               | 0.10                               | NC                  | 16               | 0.78 (0.72-0.84)      | 66.0                               | <0.0001                            | NC   |
|                                    | No           | 0                |                       |                                    |                                    |                     | 0                |                       |                                    |                                    |      |
| Education                          | Yes          | 4                | 0.80 (0.64-1.01)      | 63.4                               | 0.04                               | 0.40                | 6                | 0.69 (0.55-0.88)      | 78.5                               | <0.0001                            | 0.46 |
|                                    | No           | 4                | 0.89 (0.82-0.97)      | 0                                  | 0.50                               |                     | 10               | 0.81 (0.75-0.88)      | 50.7                               | 0.03                               |      |
| Family history of CHD              | Yes          | 2                | 0.90 (0.83-0.99)      | 0                                  | 0.97                               | 0.28                | 2                | 0.82 (0.78-0.87)      | 15.6                               | 0.28                               | 0.54 |
|                                    | No           | 6                | 0.80 (0.67-0.94)      | 48.6                               | 0.08                               |                     | 14               | 0.75 (0.67-0.84)      | 69.7                               | <0.0001                            |      |
| Body mass index                    | Yes          | 8                | 0.85 (0.76-0.94)      | 41.8                               | 0.10                               | NC                  | 13               | 0.78 (0.71-0.85)      | 71.2                               | <0.0001                            | 0.82 |
|                                    | No           | 0                |                       |                                    |                                    |                     | 3                | 0.77 (0.66-0.90)      | 0                                  | 0.42                               |      |

|                           |     |   |                  |      |      |      |    |                  |      |         |       |
|---------------------------|-----|---|------------------|------|------|------|----|------------------|------|---------|-------|
| Smoking                   | Yes | 8 | 0.85 (0.76-0.94) | 41.8 | 0.10 | NC   | 15 | 0.76 (0.70-0.83) | 58.0 | 0.003   | 0.20  |
|                           | No  | 0 |                  |      |      |      | 1  | 0.94 (0.86-1.02) |      |         |       |
| Alcohol                   | Yes | 8 | 0.85 (0.76-0.94) | 41.8 | 0.10 | NC   | 12 | 0.79 (0.72-0.86) | 70.0 | <0.0001 | 0.59  |
|                           | No  | 0 |                  |      |      |      | 4  | 0.68 (0.50-0.93) | 53.4 | 0.09    |       |
| Physical activity         | Yes | 8 | 0.85 (0.76-0.94) | 41.8 | 0.10 | NC   | 13 | 0.77 (0.71-0.84) | 72.3 | <0.0001 | 0.69  |
|                           | No  | 0 |                  |      |      |      | 3  | 0.82 (0.66-1.01) | 0    | 0.66    |       |
| Hypertension              | Yes | 8 | 0.85 (0.76-0.94) | 41.8 | 0.10 | NC   | 9  | 0.74 (0.68-0.82) | 64.6 | 0.004   | 0.18  |
|                           | No  | 0 |                  |      |      |      | 7  | 0.85 (0.74-0.97) | 52.4 | 0.05    |       |
| Hypercholesterolemia      | Yes | 5 | 0.89 (0.81-0.98) | 25.8 | 0.25 | 0.18 | 5  | 0.81 (0.76-0.86) | 29.0 | 0.23    | 0.90  |
|                           | No  | 3 | 0.73 (0.57-0.95) | 40.3 | 0.19 |      | 11 | 0.75 (0.65-0.87) | 74.7 | <0.0001 |       |
| Coffee                    | Yes | 1 | 1.06 (0.79-1.32) |      |      | 0.22 | 0  |                  |      |         | NC    |
|                           | No  | 7 | 0.83 (0.75-0.92) | 36.3 | 0.15 |      | 16 | 0.78 (0.72-0.84) | 66.0 | <0.0001 |       |
| Sugar-sweetened beverages | Yes | 1 | 1.06 (0.79-1.32) |      |      | 0.22 | 0  |                  |      |         | NC    |
|                           | No  | 7 | 0.83 (0.75-0.92) | 36.3 | 0.15 |      | 16 | 0.78 (0.72-0.84) | 66.0 | <0.0001 |       |
| Red or processed meat     | Yes | 7 | 0.87 (0.79-0.97) | 33.3 | 0.17 | 0.21 | 11 | 0.79 (0.73-0.87) | 72.6 | <0.0001 | 0.53  |
|                           | No  | 1 | 0.72 (0.57-0.90) |      |      |      | 5  | 0.72 (0.62-0.85) | 9.5  | 0.35    |       |
| Fish                      | Yes | 4 | 0.78 (0.58-1.04) | 63.2 | 0.04 | 0.78 | 7  | 0.73 (0.61-0.87) | 80.9 | <0.0001 | 0.62  |
|                           | No  | 4 | 0.87 (0.79-0.95) | 16.2 | 0.31 |      | 9  | 0.80 (0.74-0.86) | 35.2 | 0.14    |       |
| Fruit and vegetables      | Yes | 8 | 0.85 (0.76-0.94) | 41.8 | 0.10 | NC   | 11 | 0.77 (0.70-0.84) | 73.2 | <0.0001 | 0.66  |
|                           | No  | 0 |                  |      |      |      | 5  | 0.81 (0.65-0.99) | 38.7 | 0.16    |       |
| Whole grains              | Yes | 1 | 1.06 (0.79-1.32) |      |      | 0.22 | 2  | 0.44 (0.07-2.58) | 83.1 | 0.02    | 0.34  |
|                           | No  | 7 | 0.83 (0.75-0.92) | 36.3 | 0.15 |      | 14 | 0.77 (0.71-0.83) | 54.2 | 0.008   |       |
| Dairy                     | Yes | 2 | 0.71 (0.28-1.79) | 79.6 | 0.03 | 0.51 | 3  | 0.44 (0.23-0.86) | 55.6 | 0.11    | 0.008 |
|                           | No  | 6 | 0.85 (0.78-0.92) | 19.0 | 0.29 |      | 13 | 0.81 (0.76-0.86) | 50.4 | 0.02    |       |
| Energy intake             | Yes | 8 | 0.85 (0.76-0.94) | 41.8 | 0.10 | NC   | 11 | 0.76 (0.69-0.83) | 74.5 | <0.0001 | 0.43  |
|                           | No  | 0 |                  |      |      |      | 5  | 0.84 (0.74-0.95) | 16.4 | 0.31    |       |

*n* denotes the number of studies.

<sup>1</sup> P for heterogeneity within each subgroup,

<sup>2</sup> P for heterogeneity between subgroups with meta-regression analysis,

<sup>3</sup> P for heterogeneity between men and women (studies with genders mixed were excluded),

NC = not calculable

Supplementary Table 18. Newcastle-Ottawa score for studies included in the dose-response analysis of nut consumption and coronary heart disease

| Author, publication year | Representativeness | Selection of non-exposed cohort | Exposure-ascertainment <sup>1</sup> | Demonstration of outcome not present at start <sup>2</sup> | Adjustment for age | Adjustment for any other factor | Assessment of outcome | Long enough follow-up <sup>3</sup> | Adequacy of follow-up <sup>4</sup> | Total score |
|--------------------------|--------------------|---------------------------------|-------------------------------------|------------------------------------------------------------|--------------------|---------------------------------|-----------------------|------------------------------------|------------------------------------|-------------|
| Fraser, 1992             | 0                  | 1                               | 1                                   | 1                                                          | 1                  | 1                               | 1                     | 1                                  | 1                                  | 8           |
| Mann, 1997               | 0                  | 1                               | 0                                   | 1                                                          | 1                  | 1                               | 1                     | 1                                  | 0                                  | 6           |
| Albert, 2002             | 0                  | 1                               | 1                                   | 1                                                          | 1                  | 1                               | 1                     | 1                                  | 0                                  | 7           |
| Blomhoff, 2006           | 1                  | 1                               | 0                                   | 1                                                          | 1                  | 1                               | 1                     | 1                                  | 0                                  | 7           |
| Bao, 2013, HPFS          | 0                  | 1                               | 1                                   | 1                                                          | 1                  | 1                               | 1                     | 1                                  | 1                                  | 8           |
| Bao, 2013, NHS           | 0                  | 1                               | 1                                   | 1                                                          | 1                  | 1                               | 1                     | 1                                  | 1                                  | 8           |
| Haring, 2014             | 1                  | 1                               | 1                                   | 1                                                          | 1                  | 1                               | 1                     | 1                                  | 0                                  | 8           |
| Van den Brandt, 2015     | 1                  | 1                               | 1                                   | 1                                                          | 1                  | 1                               | 1                     | 1                                  | 1                                  | 9           |
| Luu, 2015                | 1                  | 1                               | 1                                   | 0                                                          | 1                  | 1                               | 1                     | 1                                  | 1                                  | 8           |
| Hshieh, 2015             | 0                  | 1                               | 1                                   | 0                                                          | 1                  | 1                               | 1                     | 1                                  | 0                                  | 6           |
| Gopinath, 2015           | 1                  | 1                               | 1                                   | 0                                                          | 1                  | 1                               | 1                     | 1                                  | 0                                  | 7           |
| Wang, 2016               | 0                  | 1                               | 0                                   | 0                                                          | 1                  | 1                               | 1                     | 1                                  | 0                                  | 5           |

<sup>1</sup> 1 point for validated self-reported questionnaires or interview

<sup>2</sup> 1 point for excluding prevalent coronary heart disease or cardiovascular disease cases

<sup>3</sup> 1 point for loss-to-follow-up less than 10%

<sup>4</sup> 1 point for 3 years or more

Supplementary Table 19. Newcastle-Ottawa score for studies included in the dose-response analysis of nut consumption and stroke

| Author, publication year | Representativeness | Selection of non-exposed cohort | Exposure-ascertainment <sup>1</sup> | Demonstration of outcome not present at start <sup>2</sup> | Adjustment for age | Adjustment for any other factor | Assessment of outcome | Long enough follow-up <sup>3</sup> | Adequacy of follow-up <sup>4</sup> | Total score |
|--------------------------|--------------------|---------------------------------|-------------------------------------|------------------------------------------------------------|--------------------|---------------------------------|-----------------------|------------------------------------|------------------------------------|-------------|
| Yochum, 2000             | 1                  | 1                               | 1                                   | 1                                                          | 1                  | 1                               | 1                     | 1                                  | 0                                  | 8           |
| Djousse, 2010            | 0                  | 1                               | 1                                   | 1                                                          | 1                  | 1                               | 1                     | 1                                  | 0                                  | 7           |
| Yaemsiri, 2012           | 1                  | 1                               | 1                                   | 1                                                          | 1                  | 1                               | 1                     | 1                                  | 0                                  | 8           |
| Bernstein, 2012, HPFS    | 0                  | 1                               | 1                                   | 1                                                          | 1                  | 1                               | 1                     | 1                                  | 1                                  | 8           |
| Bernstein, 2012, NHS     | 0                  | 1                               | 1                                   | 1                                                          | 1                  | 1                               | 1                     | 1                                  | 1                                  | 8           |
| Di Giuseppe, 2014        | 1                  | 1                               | 1                                   | 1                                                          | 1                  | 1                               | 1                     | 1                                  | 1                                  | 9           |
| Van den Brandt, 2015     | 1                  | 1                               | 1                                   | 1                                                          | 1                  | 1                               | 1                     | 1                                  | 1                                  | 9           |
| Luu, 2015                | 1                  | 1                               | 1                                   | 0                                                          | 1                  | 1                               | 1                     | 1                                  | 1                                  | 8           |
| Haring, 2015             | 1                  | 1                               | 1                                   | 1                                                          | 1                  | 1                               | 1                     | 1                                  | 0                                  | 8           |
| Gopinath, 2015           | 1                  | 1                               | 1                                   | 0                                                          | 1                  | 1                               | 1                     | 1                                  | 0                                  | 7           |
| Wang, 2016               | 0                  | 1                               | 0                                   | 0                                                          | 1                  | 1                               | 1                     | 1                                  | 0                                  | 5           |

<sup>1</sup> 1 point for validated self-reported questionnaires or interview

<sup>2</sup> 1 point for excluding prevalent stroke or cardiovascular disease cases

<sup>3</sup> 1 point for loss-to-follow-up less than 10%

<sup>4</sup> 1 point for 3 years or more

Supplementary Table 20. Newcastle-Ottawa score for studies included in the dose-response analysis of nut consumption and cardiovascular disease

| Author, publication year | Representativeness | Selection of non-exposed cohort | Exposure-ascertainment <sup>1</sup> | Demonstration of outcome not present at start <sup>2</sup> | Adjustment for age | Adjustment for any other factor | Assessment of outcome | Long enough follow-up <sup>3</sup> | Adequacy of follow-up <sup>4</sup> | Total score |
|--------------------------|--------------------|---------------------------------|-------------------------------------|------------------------------------------------------------|--------------------|---------------------------------|-----------------------|------------------------------------|------------------------------------|-------------|
| Blomhoff, 2006           | 1                  | 1                               | 0                                   | 1                                                          | 1                  | 1                               | 1                     | 1                                  | 0                                  | 7           |
| Fitzgerald, 2012         | 1                  | 1                               | 1                                   | 1                                                          | 1                  | 1                               | 1                     | 1                                  | 1                                  | 9           |
| Von Ruesten, 2013        | 1                  | 1                               | 1                                   | 1                                                          | 1                  | 1                               | 1                     | 1                                  | 1                                  | 9           |
| Guasch-Ferre, 2013       | 0                  | 1                               | 1                                   | 1                                                          | 1                  | 1                               | 1                     | 1                                  | 0                                  | 7           |
| Bao, 2013, HPFS          | 0                  | 1                               | 1                                   | 1                                                          | 1                  | 1                               | 1                     | 1                                  | 1                                  | 8           |
| Bao, 2013, NHS           | 0                  | 1                               | 1                                   | 1                                                          | 1                  | 1                               | 1                     | 1                                  | 1                                  | 8           |
| Van den Brandt, 2015     | 1                  | 1                               | 1                                   | 1                                                          | 1                  | 1                               | 1                     | 1                                  | 1                                  | 9           |
| Luu, 2015                | 1                  | 1                               | 1                                   | 0                                                          | 1                  | 1                               | 1                     | 1                                  | 1                                  | 8           |
| Hshieh, 2015             | 0                  | 1                               | 1                                   | 0                                                          | 1                  | 1                               | 1                     | 1                                  | 0                                  | 6           |
| Gopinath, 2015           | 1                  | 1                               | 1                                   | 0                                                          | 1                  | 1                               | 1                     | 1                                  | 0                                  | 7           |
| Wang, 2016               | 0                  | 1                               | 0                                   | 0                                                          | 1                  | 1                               | 1                     | 1                                  | 0                                  | 5           |
| Eslemparast, 2016        | 1                  | 1                               | 1                                   | 0                                                          | 1                  | 1                               | 1                     | 1                                  | 1                                  | 8           |

<sup>1</sup> 1 point for validated self-reported questionnaires or interview

<sup>2</sup> 1 point for excluding prevalent coronary heart disease, stroke or cardiovascular disease cases

<sup>3</sup> 1 point for loss-to-follow-up less than 10%

<sup>4</sup> 1 point for 3 years or more



Supplementary Table 21. Newcastle-Ottawa score for studies included in the dose-response analysis of nut consumption and total cancer

| Author, publication year | Representativeness | Selection of non-exposed cohort | Exposure-ascertainment <sup>1</sup> | Demonstration of outcome not present at start <sup>2</sup> | Adjustment for age | Adjustment for any other factor | Assessment of outcome | Long enough follow-up <sup>3</sup> | Adequacy of follow-up <sup>4</sup> | Total score |
|--------------------------|--------------------|---------------------------------|-------------------------------------|------------------------------------------------------------|--------------------|---------------------------------|-----------------------|------------------------------------|------------------------------------|-------------|
| Von Ruesten, 2013        | 1                  | 1                               | 1                                   | 1                                                          | 1                  | 1                               | 1                     | 1                                  | 1                                  | 9           |
| Guasch-Ferre, 2013       | 0                  | 1                               | 1                                   | 1                                                          | 1                  | 1                               | 1                     | 1                                  | 0                                  | 7           |
| Bao, 2013, HPFS          | 0                  | 1                               | 1                                   | 1                                                          | 1                  | 1                               | 1                     | 1                                  | 1                                  | 8           |
| Bao, 2013, NHS           | 0                  | 1                               | 1                                   | 1                                                          | 1                  | 1                               | 1                     | 1                                  | 1                                  | 8           |
| Van den Brandt, 2015     | 1                  | 1                               | 1                                   | 1                                                          | 1                  | 1                               | 1                     | 1                                  | 1                                  | 9           |
| Luu, 2015                | 1                  | 1                               | 1                                   | 1                                                          | 1                  | 1                               | 1                     | 1                                  | 1                                  | 9           |
| Hshieh, 2015             | 0                  | 1                               | 1                                   | 0                                                          | 1                  | 1                               | 1                     | 1                                  | 0                                  | 6           |
| Eslemparast, 2016        | 1                  | 1                               | 1                                   | 0                                                          | 1                  | 1                               | 1                     | 1                                  | 1                                  | 8           |

<sup>1</sup> 1 point for validated self-reported questionnaires or interview

<sup>2</sup> 1 point for excluding prevalent cancer cases

<sup>3</sup> 1 point for loss-to-follow-up less than 10%

<sup>4</sup> 1 point for 3 years or more

Supplementary Table 22. Newcastle-Ottawa score for studies included in the dose-response analysis of nut consumption and all-cause mortality

| Author, publication year | Representativeness | Selection of non-exposed cohort | Exposure-ascertainment <sup>1</sup> | Demonstration of outcome not present at start <sup>2</sup> | Adjustment for age | Adjustment for any other factor | Assessment of outcome | Long enough follow-up <sup>3</sup> | Adequacy of follow-up <sup>4</sup> | Total score |
|--------------------------|--------------------|---------------------------------|-------------------------------------|------------------------------------------------------------|--------------------|---------------------------------|-----------------------|------------------------------------|------------------------------------|-------------|
| Mann, 1997               | 0                  | 1                               | 0                                   | 1                                                          | 1                  | 1                               | 1                     | 1                                  | 0                                  | 6           |
| Fraser, 1997, whites     | 0                  | 1                               | 0                                   | 1                                                          | 1                  | 1                               | 1                     | 1                                  | 1                                  | 7           |
| Fraser, 1997, blacks     | 0                  | 1                               | 0                                   | 0                                                          | 1                  | 1                               | 1                     | 1                                  | 1                                  | 6           |
| Blomhoff, 2006           | 1                  | 1                               | 0                                   | 1                                                          | 1                  | 1                               | 1                     | 1                                  | 0                                  | 7           |
| Leenders, 2013           | 1                  | 1                               | 1                                   | 1                                                          | 1                  | 1                               | 1                     | 1                                  | 1                                  | 9           |
| Guasch-Ferre, 2013       | 0                  | 1                               | 1                                   | 1                                                          | 1                  | 1                               | 1                     | 1                                  | 0                                  | 7           |
| Bao, 2013, HPFS          | 0                  | 1                               | 1                                   | 1                                                          | 1                  | 1                               | 1                     | 1                                  | 1                                  | 8           |
| Bao, 2013, NHS           | 0                  | 1                               | 1                                   | 1                                                          | 1                  | 1                               | 1                     | 1                                  | 1                                  | 8           |
| Fernandez-Montero, 2014  | 0                  | 1                               | 1                                   | 0                                                          | 1                  | 1                               | 1                     | 1                                  | 1                                  | 7           |
| Van den Brandt, 2015     | 1                  | 1                               | 1                                   | 1                                                          | 1                  | 1                               | 1                     | 1                                  | 1                                  | 9           |
| Luu, 2015                | 1                  | 1                               | 1                                   | 1                                                          | 1                  | 1                               | 1                     | 1                                  | 1                                  | 9           |
| Hshieh, 2015             | 0                  | 1                               | 1                                   | 0                                                          | 1                  | 1                               | 1                     | 1                                  | 0                                  | 6           |
| Gopinath, 2015           | 1                  | 1                               | 1                                   | 0                                                          | 1                  | 1                               | 1                     | 1                                  | 0                                  | 7           |
| Bonaccio, 2015           | 1                  | 1                               | 1                                   | 1                                                          | 1                  | 1                               | 1                     | 1                                  | 1                                  | 9           |

|                   |   |   |   |   |   |   |   |   |   |   |
|-------------------|---|---|---|---|---|---|---|---|---|---|
| Wang, 2016        | 0 | 1 | 0 | 0 | 1 | 1 | 1 | 1 | 0 | 5 |
| Eslemparast, 2016 | 1 | 1 | 1 | 0 | 1 | 1 | 1 | 1 | 1 | 8 |

<sup>1</sup> 1 point for validated self-reported questionnaires or interview

<sup>2</sup> 1 point for excluding prevalent cardiovascular disease or cancer cases

<sup>3</sup> 1 point for loss-to-follow-up less than 10%

<sup>4</sup> 1 point for 3 years or more

Supplementary Table 23. Attributable fractions and number of deaths due to coronary heart disease, cancer, respiratory disease, diabetes, and total mortality by country attributable to a nut intake below 20 g/d in North and South America, Europe, Southeast Asia and the Western Pacific

|                     |                                  | Coronary heart disease |       | Total cancer |       | Respiratory disease |       | Diabetes |      | All-cause mortality |        |
|---------------------|----------------------------------|------------------------|-------|--------------|-------|---------------------|-------|----------|------|---------------------|--------|
|                     |                                  | 20 g/d                 |       | 20 g/d       |       | 20 g/d              |       | 20 g/d   |      | 20 g/d              |        |
| Region              | Country                          | %                      | N     | %            | N     | %                   | N     | %        | N    | %                   | N      |
| America A           | Canada                           | 13.3                   | 7087  | 5.2          | 4096  | 21.6                | 3349  | 11.7     | 951  | 8.6                 | 23191  |
|                     | Cuba                             | 13.3                   | 2958  | 5.2          | 1200  | 21.6                | 894   | 11.7     | 243  | 8.6                 | 8195   |
|                     | United States                    | 13.3                   | 71718 | 5.2          | 32872 | 21.6                | 39338 | 11.7     | 8762 | 8.6                 | 227203 |
| America B           | Antigua and Barbuda              | 18.8                   | 16    | 7.4          | 7     | 27.9                | 4     | 13.5     | 7    | 11.4                | 62     |
|                     | Argentina                        | 18.8                   | 9932  | 7.4          | 5241  | 27.9                | 9627  | 13.5     | 1101 | 11.4                | 37016  |
|                     | Barbados                         | 18.8                   | 63    | 7.4          | 33    | 27.9                | 18    | 13.5     | 33   | 11.4                | 265    |
|                     | Belize                           | 18.8                   | 46    | 7.4          | 21    | 27.9                | 17    | 13.5     | 20   | 11.4                | 200    |
|                     | Brazil                           | 18.8                   | 34231 | 7.4          | 15834 | 27.9                | 20286 | 13.5     | 6541 | 11.4                | 136313 |
|                     | Chile                            | 18.8                   | 2223  | 7.4          | 1979  | 27.9                | 1789  | 13.5     | 367  | 11.4                | 12200  |
|                     | Colombia                         | 18.8                   | 6906  | 7.4          | 3223  | 27.9                | 4888  | 13.5     | 985  | 11.4                | 26080  |
|                     | Costa Rica                       | 18.8                   | 580   | 7.4          | 362   | 27.9                | 393   | 13.5     | 53   | 11.4                | 2348   |
|                     | Dominica                         | 18.8                   | 11    | 7.4          | 6     | 27.9                | 5     | 13.5     | 6    | 11.4                | 55     |
|                     | Dominican Republic               | 18.8                   | 2183  | 7.4          | 673   | 27.9                | 665   | 13.5     | 295  | 11.4                | 6462   |
|                     | El Salvador                      | 18.8                   | 1282  | 7.4          | 353   | 27.9                | 606   | 13.5     | 215  | 11.4                | 4328   |
|                     | Grenada                          | 18.8                   | 25    | 7.4          | 10    | 27.9                | 7     | 13.5     | 10   | 11.4                | 94     |
|                     | Guyana                           | 18.8                   | 167   | 7.4          | 53    | 27.9                | 33    | 13.5     | 55   | 11.4                | 606    |
|                     | Honduras                         | 18.8                   | 1410  | 7.4          | 323   | 27.9                | 978   | 13.5     | 132  | 11.4                | 4296   |
|                     | Jamaica                          | 18.8                   | 395   | 7.4          | 241   | 27.9                | 198   | 13.5     | 272  | 11.4                | 1995   |
|                     | Mexico                           | 18.8                   | 15007 | 7.4          | 6189  | 27.9                | 10584 | 13.5     | 6844 | 11.4                | 69940  |
|                     | Panama                           | 18.8                   | 448   | 7.4          | 245   | 27.9                | 277   | 13.5     | 110  | 11.4                | 2031   |
|                     | Paraguay                         | 18.8                   | 999   | 7.4          | 426   | 27.9                | 320   | 13.5     | 274  | 11.4                | 3701   |
|                     | Saint Lucia                      | 18.8                   | 34    | 7.4          | 17    | 27.9                | 14    | 13.5     | 17   | 11.4                | 153    |
|                     | Saint Vincent and the Grenadines | 18.8                   | 23    | 7.4          | 9     | 27.9                | 5     | 13.5     | 8    | 11.4                | 82     |
| Suriname            | 18.8                             | 94                     | 7.4   | 44           | 27.9  | 31                  | 13.5  | 30       | 11.4 | 416                 |        |
| The Bahamas         | 18.8                             | 78                     | 7.4   | 38           | 27.9  | 21                  | 13.5  | 28       | 11.4 | 317                 |        |
| Trinidad and Tobago | 18.8                             | 346                    | 7.4   | 134          | 27.9  | 92                  | 13.5  | 209      | 11.4 | 1343                |        |
| Uruguay             | 18.8                             | 859                    | 7.4   | 643          | 27.9  | 619                 | 13.5  | 91       | 11.4 | 3778                |        |

|                |                        |       |       |       |       |       |       |      |      |       |          |
|----------------|------------------------|-------|-------|-------|-------|-------|-------|------|------|-------|----------|
|                | Venezuela              | 18.8  | 4385  | 7.4   | 1960  | 27.9  | 1836  | 13.5 | 905  | 11.4  | 16828    |
| America D      | Bolivia                | 18.8  | 1168  | 7.4   | 553   | 27.9  | 605   | 13.5 | 122  | 11.4  | 5105     |
|                | Ecuador                | 18.8  | 1955  | 7.4   | 1018  | 27.9  | 962   | 13.5 | 455  | 11.4  | 8867     |
|                | Guatemala              | 18.8  | 1287  | 7.4   | 607   | 27.9  | 753   | 13.5 | 482  | 11.4  | 7389     |
|                | Haiti                  | 18.8  | 1109  | 7.4   | 498   | 27.9  | 355   | 13.5 | 422  | 11.4  | 64687318 |
|                | Nicaragua              | 18.8  | 693   | 7.4   | 220   | 27.9  | 370   | 13.5 | 154  | 11.4  | 2439     |
|                | Peru                   | 18.8  | 3008  | 7.4   | 1891  | 27.9  | 2278  | 13.5 | 429  | 11.4  | 14295    |
| Europa A       | Andorra                | 16.5  | 21    | 6.0   | 11    | 26.2  | 10    | 13.2 | 1    | 10.3  | 67       |
|                | Austria                | 16.5  | 3658  | 6.0   | 1311  | 26.2  | 907   | 13.2 | 328  | 10.3  | 8709     |
|                | Belgium                | 16.5  | 3385  | 6.0   | 1780  | 26.2  | 2041  | 13.2 | 252  | 10.3  | 11698    |
|                | Croatia                | 16.5  | 2181  | 6.0   | 777   | 26.2  | 680   | 13.2 | 132  | 10.3  | 5325     |
|                | Czech Republic         | 16.5  | 5229  | 6.0   | 1706  | 26.2  | 1085  | 13.2 | 268  | 10.3  | 11502    |
|                | Denmark                | 17.1  | 1526  | 6.3   | 875   | 26.9  | 1179  | 13.9 | 194  | 10.7  | 5760     |
|                | Finland                | 16.5  | 2029  | 6.0   | 726   | 26.2  | 456   | 13.2 | 54   | 10.3  | 5445     |
|                | France                 | 16.0  | 14881 | 5.8   | 10454 | 25.4  | 6353  | 12.8 | 1620 | 9.9   | 58477    |
|                | Germany                | 16.7  | 37138 | 6.0   | 14470 | 26.4  | 12149 | 13.4 | 2770 | 10.4  | 95450    |
|                | Greece                 | 17.2  | 6573  | 6.3   | 2033  | 27.1  | 2490  | 14.0 | 221  | 10.8  | 14647    |
|                | Iceland                | 16.5  | 65    | 6.0   | 33    | 26.2  | 26    | 13.2 | 3    | 10.3  | 197      |
|                | Ireland                | 16.5  | 985   | 6.0   | 507   | 26.2  | 561   | 13.2 | 66   | 10.3  | 3166     |
|                | Israel                 | 16.5  | 1190  | 6.0   | 653   | 26.2  | 494   | 13.2 | 297  | 10.3  | 4372     |
|                | Italy                  | 17.4  | 19120 | 6.4   | 11464 | 27.5  | 8104  | 14.2 | 2980 | 11.0  | 69682    |
|                | Luxembourg             | 16.5  | 135   | 6.0   | 69    | 26.2  | 63    | 13.2 | 7    | 10.3  | 408      |
|                | Malta                  | 16.5  | 127   | 6.0   | 47    | 26.2  | 35    | 13.2 | 11   | 10.3  | 292      |
|                | Netherlands            | 13.4  | 3174  | 4.4   | 2195  | 21.4  | 2105  | 9.7  | 324  | 8.0   | 12071    |
|                | Norway                 | 16.2  | 1232  | 5.9   | 664   | 25.7  | 667   | 13.0 | 91   | 10.1  | 4252     |
|                | Portugal               | 16.5  | 2655  | 6.0   | 1653  | 26.2  | 1572  | 13.2 | 534  | 10.3  | 11288    |
|                | Slovenia               | 16.5  | 589   | 6.0   | 333   | 26.2  | 278   | 13.2 | 47   | 10.3  | 2157     |
|                | Spain                  | 15.6  | 11868 | 5.5   | 6280  | 24.9  | 7309  | 12.2 | 1276 | 9.7   | 41093    |
| Sweden         | 19.5                   | 4452  | 6.8   | 1565  | 29.8  | 1280  | 15.2  | 317  | 12.1 | 11285 |          |
| Switzerland    | 16.5                   | 2217  | 6.0   | 1103  | 26.2  | 689   | 13.2  | 214  | 10.3 | 6695  |          |
| United Kingdom | 19.5                   | 18457 | 6.8   | 11083 | 29.8  | 12520 | 15.2  | 901  | 12.1 | 70049 |          |
| Europe B       | Albania                | 16.5  | 717   | 6.0   | 255   | 26.2  | 373   | 13.2 | 30   | 10.3  | 2431     |
|                | Armenia                | 16.5  | 1448  | 6.0   | 320   | 26.2  | 339   | 13.2 | 168  | 10.3  | 2854     |
|                | Azerbaijan             | 16.5  | 3008  | 6.0   | 430   | 26.2  | 588   | 13.2 | 169  | 10.3  | 5502     |
|                | Bosnia and Herzegovina | 16.5  | 1065  | 6.0   | 484   | 26.2  | 572   | 13.2 | 268  | 10.3  | 3719     |
|                | Bulgaria               | 16.5  | 4680  | 6.0   | 1037  | 26.2  | 2465  | 13.2 | 252  | 10.3  | 11288    |

|                   |              |      |        |     |       |      |        |      |       |      |        |
|-------------------|--------------|------|--------|-----|-------|------|--------|------|-------|------|--------|
|                   | Georgia      | 16.5 | 2885   | 6.0 | 367   | 26.2 | 1053   | 13.2 | 109   | 10.3 | 5457   |
|                   | Kyrgyzstan   | 16.5 | 1662   | 6.0 | 214   | 26.2 | 589    | 13.2 | 37    | 10.3 | 3443   |
|                   | Macedonia    | 16.5 | 524    | 6.0 | 212   | 26.2 | 185    | 13.2 | 93    | 10.3 | 1848   |
|                   | Montenegro   | 16.5 | 215    | 6.0 | 71    | 26.2 | 12     | 13.2 | 18    | 10.3 | 630    |
|                   | Poland       | 16.5 | 13048  | 6.0 | 5745  | 26.2 | 6188   | 13.2 | 879   | 10.3 | 40811  |
|                   | Romania      | 16.5 | 10877  | 6.0 | 2485  | 26.2 | 2228   | 13.2 | 258   | 10.3 | 24538  |
|                   | Serbia       | 16.5 | 2479   | 6.0 | 1168  | 26.2 | 1143   | 13.2 | 362   | 10.3 | 9482   |
|                   | Slovakia     | 16.5 | 3163   | 6.0 | 740   | 26.2 | 345    | 13.2 | 91    | 10.3 | 5473   |
|                   | Tajikistan   | 16.5 | 1519   | 6.0 | 197   | 26.2 | 422    | 13.2 | 84    | 10.3 | 3237   |
|                   | Turkey       | 16.5 | 11025  | 6.0 | 5534  | 26.2 | 10559  | 13.2 | 2535  | 10.3 | 39610  |
|                   | Turkmenistan | 16.5 | 1713   | 6.0 | 223   | 26.2 | 364    | 13.2 | 64    | 10.3 | 3059   |
|                   | Uzbekistan   | 16.5 | 8958   | 6.0 | 852   | 26.2 | 1723   | 13.2 | 468   | 10.3 | 16326  |
| Europe C          | Belarus      | 16.5 | 11134  | 6.0 | 1273  | 26.2 | 1227   | 13.2 | 70    | 10.3 | 14950  |
|                   | Estonia      | 16.5 | 958    | 6.0 | 202   | 26.2 | 80     | 13.2 | 18    | 10.3 | 1626   |
|                   | Hungary      | 16.5 | 6066   | 6.0 | 1922  | 26.2 | 1536   | 13.2 | 300   | 10.3 | 12979  |
|                   | Kazakhstan   | 16.5 | 7281   | 6.0 | 1318  | 26.2 | 1648   | 13.2 | 190   | 10.3 | 15001  |
|                   | Latvia       | 16.5 | 1672   | 6.0 | 309   | 26.2 | 121    | 13.2 | 42    | 10.3 | 2759   |
|                   | Lithuania    | 16.5 | 2797   | 6.0 | 436   | 26.2 | 268    | 13.2 | 28    | 10.3 | 4016   |
|                   | Moldova      | 16.5 | 2785   | 6.0 | 320   | 26.2 | 331    | 13.2 | 31    | 10.3 | 3998   |
|                   | Russia       | 16.5 | 111226 | 6.0 | 17385 | 26.2 | 9107   | 13.2 | 1199  | 10.3 | 189142 |
|                   | Ukraine      | 16.5 | 57197  | 6.0 | 5420  | 26.2 | 4361   | 13.2 | 304   | 10.3 | 68634  |
| South-East Asia B | Indonesia    | 17.9 | 33518  | 6.0 | 8698  | 27.7 | 35280  | 13.4 | 10584 | 10.9 | 154589 |
|                   | Sri Lanka    | 17.9 | 4126   | 6.0 | 552   | 27.7 | 4455   | 13.4 | 1431  | 10.9 | 13760  |
|                   | Thailand     | 17.9 | 11297  | 6.0 | 5720  | 27.7 | 10147  | 13.4 | 3246  | 10.9 | 55079  |
|                   | Timor-Leste  | 17.9 | 125    | 6.0 | 23    | 27.7 | 72     | 13.4 | 14    | 10.9 | 359    |
| South-East Asia D | Bangladesh   | 17.9 | 12690  | 6.0 | 6518  | 27.7 | 24887  | 13.4 | 3900  | 10.9 | 89654  |
|                   | Bhutan       | 17.9 | 89     | 6.0 | 22    | 27.7 | 115    | 13.4 | 24    | 10.9 | 424    |
|                   | India        | 17.9 | 222354 | 6.0 | 39138 | 27.7 | 384446 | 13.4 | 31769 | 10.9 | 961811 |
|                   | Maldives     | 17.9 | 21     | 6.0 | 5     | 27.7 | 29     | 13.4 | 4     | 10.9 | 103    |
|                   | Myanmar      | 17.9 | 4862   | 6.0 | 3897  | 27.7 | 9763   | 13.4 | 1815  | 10.9 | 42922  |
|                   | Nepal        | 17.9 | 3203   | 6.0 | 766   | 27.7 | 4313   | 13.4 | 588   | 10.9 | 14469  |
|                   | South Korea  | 15.5 | 6290   | 6.0 | 6035  | 24.8 | 5784   | 13.4 | 2285  | 10.0 | 34832  |
| Western Pacific A | Australia    | 13.4 | 3734   | 4.0 | 1921  | 21.2 | 2287   | 8.9  | 403   | 7.8  | 12734  |
|                   | Brunei       | 18.3 | 37     | 6.1 | 17    | 28.2 | 27     | 13.8 | 20    | 11.2 | 145    |
|                   | Japan        | 18.3 | 26562  | 6.1 | 25537 | 28.2 | 26469  | 13.8 | 1319  | 11.2 | 149548 |
|                   | New Zealand  | 18.3 | 1105   | 6.1 | 588   | 28.2 | 639    | 13.8 | 101   | 7.8  | 2557   |
|                   | Singapore    | 18.3 | 804    | 6.1 | 379   | 28.2 | 308    | 13.8 | 70    | 11.2 | 2617   |

|                         |                                |      |         |      |        |      |         |      |        |       |         |
|-------------------------|--------------------------------|------|---------|------|--------|------|---------|------|--------|-------|---------|
| Western Pacific B       | Cambodia                       | 19.5 | 3802    | 6.9  | 744    | 29.4 | 2500    | 14.7 | 502    | 12.0  | 12182   |
|                         | China                          | 19.5 | 232554  | 6.9  | 145187 | 29.4 | 313550  | 14.7 | 19280  | 12.0  | 1066120 |
|                         | Federated States of Micronesia | 19.5 | 16      | 6.9  | 3      | 29.4 | 18      | 14.7 | 17     | 12.0  | 83      |
|                         | Fiji                           | 19.5 | 238     | 6.9  | 45     | 29.4 | 124     | 14.7 | 235    | 12.0  | 829     |
|                         | Kiribati                       | 19.5 | 13      | 6.9  | 3      | 29.4 | 21      | 14.7 | 18     | 12.0  | 97      |
|                         | Laos                           | 19.5 | 1078    | 6.9  | 260    | 29.4 | 820     | 14.7 | 202    | 12.0  | 4106    |
|                         | Malaysia                       | 19.5 | 4070    | 6.9  | 1455   | 29.4 | 2589    | 14.7 | 633    | 12.0  | 16917   |
|                         | Marshall Islands               | 19.5 | 10      | 6.9  | 2      | 29.4 | 10      | 14.7 | 12     | 12.0  | 53      |
|                         | Mongolia                       | 19.5 | 651     | 6.9  | 301    | 29.4 | 120     | 14.7 | 17     | 12.0  | 2344    |
|                         | North Korea                    | 19.5 | 7793    | 6.9  | 3246   | 29.4 | 6107    | 14.7 | 455    | 12.0  | 24490   |
|                         | Oceania                        | 19.5 | 2092    | 6.9  | 459    | 29.4 | 1945    | 14.7 | 1006   | 12.0  | 8269    |
|                         | Papua New Guinea               | 19.5 | 1648    | 6.9  | 371    | 29.4 | 1574    | 14.7 | 581    | 12.0  | 6352    |
|                         | Philippines                    | 19.5 | 13004   | 6.9  | 4603   | 29.4 | 8336    | 14.7 | 3250   | 12.0  | 55203   |
|                         | Samoa                          | 19.5 | 33      | 6.9  | 7      | 29.4 | 27      | 14.7 | 28     | 12.0  | 128     |
|                         | Solomon Islands                | 19.5 | 81      | 6.9  | 14     | 29.4 | 104     | 14.7 | 72     | 12.0  | 443     |
|                         | Taiwan                         | 19.5 | 2519    | 6.9  | 3162   | 29.4 | 3221    | 14.7 | 1564   | 12.0  | 19515   |
|                         | Tonga                          | 19.5 | 16      | 6.9  | 7      | 29.4 | 17      | 14.7 | 14     | 12.0  | 82      |
| Vanuatu                 | 19.5                           | 38   | 6.9     | 7    | 29.4   | 50   | 14.7    | 30   | 12.0   | 201   |         |
| Vietnam                 | 19.5                           | 6599 | 6.9     | 7789 | 29.4   | 9129 | 14.7    | 1809 | 12.0   | 60785 |         |
| Regional                | America A                      | 13.3 | 81763   | 5.2  | 38168  | 21.6 | 43581   | 11.7 | 9956   | 8.6   | 258589  |
|                         | America B                      | 18.8 | 81743   | 7.4  | 38064  | 27.9 | 53313   | 11.7 | 18608  | 11.4  | 330909  |
|                         | America D                      | 18.8 | 9220    | 7.4  | 4787   | 27.9 | 5323    | 11.7 | 2064   | 11.4  | 45413   |
|                         | Europe A                       | 16.9 | 142887  | 6.0  | 71792  | 26.7 | 63053   | 13.4 | 12908  | 10.5  | 454087  |
|                         | Europe B                       | 16.5 | 68986   | 6.0  | 20335  | 26.2 | 27425   | 13.2 | 5417   | 10.3  | 179708  |
|                         | Europe C                       | 16.5 | 201116  | 6.0  | 28586  | 26.2 | 18679   | 13.2 | 2182   | 10.3  | 313105  |
|                         | South-East Asia B              | 17.9 | 49066   | 6.0  | 14993  | 27.7 | 49954   | 13.4 | 15275  | 10.9  | 223787  |
|                         | South-East Asia D              | 17.9 | 249509  | 6.0  | 56381  | 27.7 | 429337  | 13.4 | 40385  | 10.9  | 1144215 |
|                         | Western Pacific A              | 17.6 | 32242   | 5.9  | 28442  | 27.5 | 29730   | 12.3 | 1913   | 10.8  | 167601  |
|                         | Western Pacific B              | 19.5 | 276255  | 6.9  | 167665 | 29.4 | 350262  | 14.7 | 29725  | 12.0  | 1278200 |
| Total (regions covered) |                                | 17.4 | 1192787 | 6.3  | 469213 | 27.8 | 1072380 | 13.2 | 138901 | 11.0  | 4395614 |

Supplementary Figure 1. Nuts and coronary heart disease, high vs. low analysis

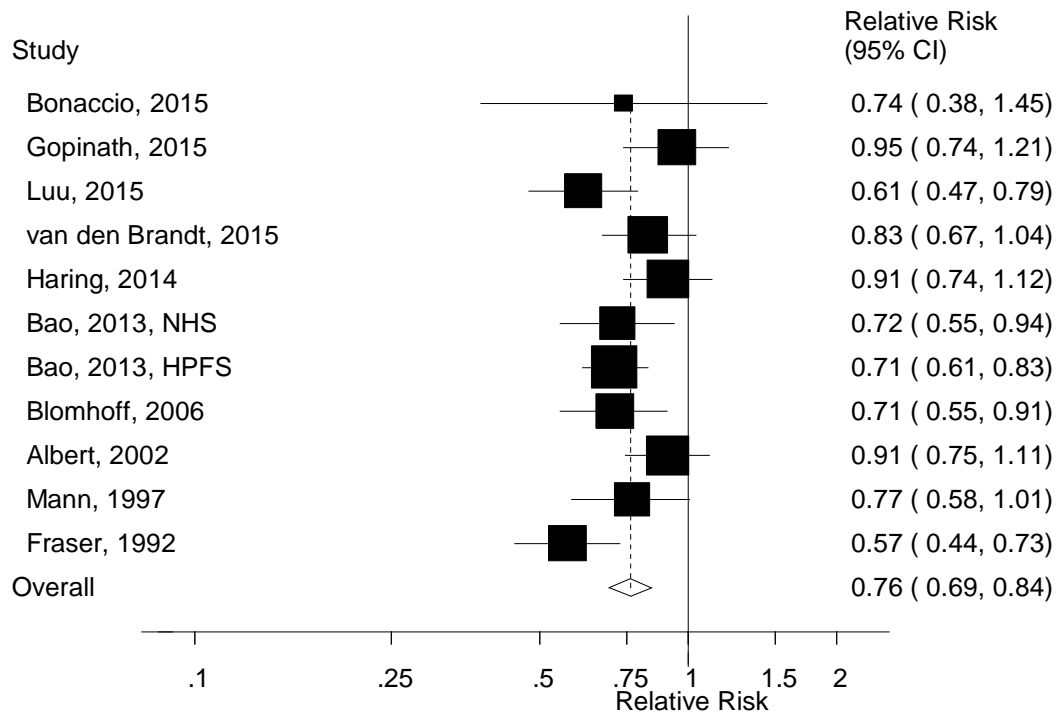

Supplementary Figure 2. Nuts and stroke, high vs. low analysis

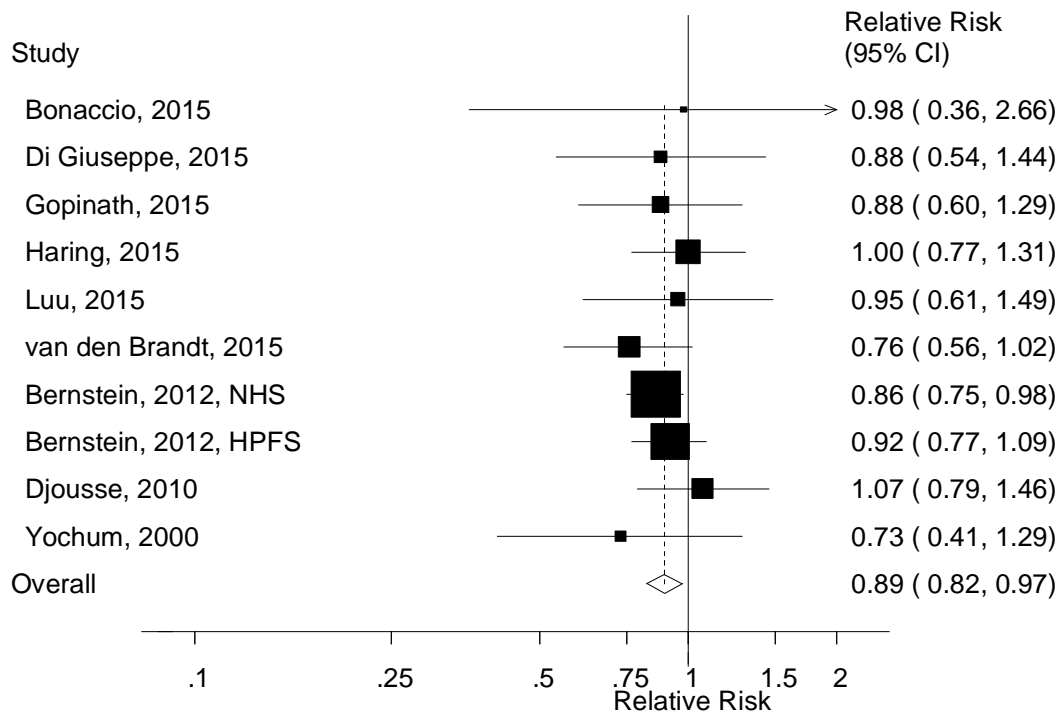



Supplementary Figure 3. Nuts and cardiovascular disease, high vs. low analysis

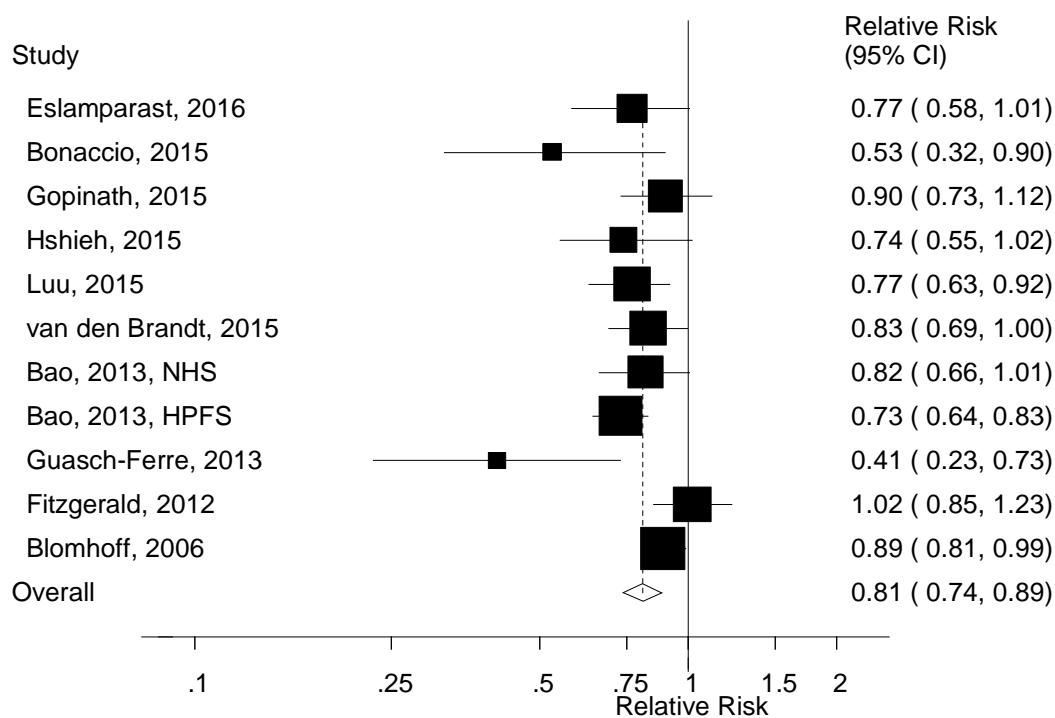

Supplementary Figure 4. Nuts and total cancer, high vs. low analysis

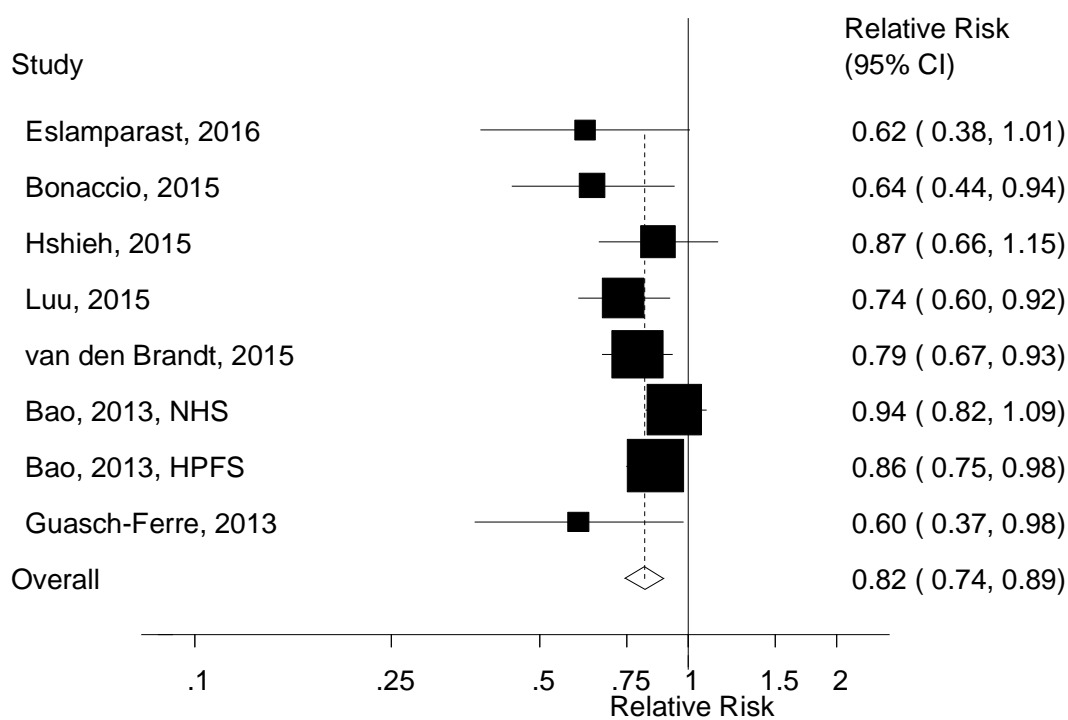

Supplementary Figure 5. Nuts and all-cause mortality, high vs. low analysis

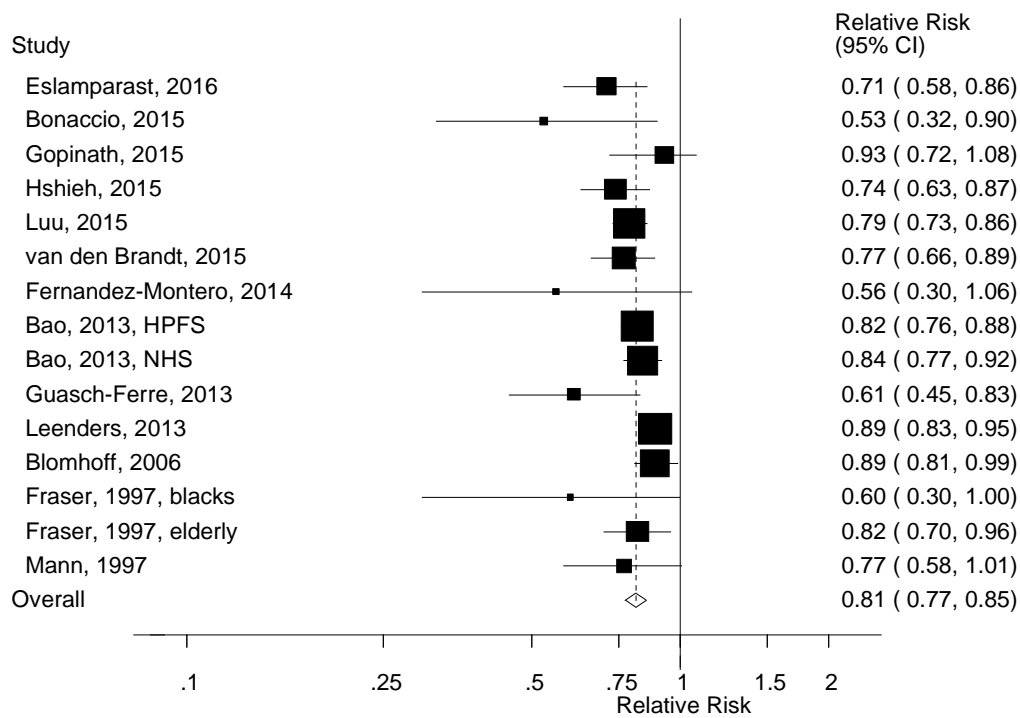

Supplementary Figure 6. Nuts and respiratory disease mortality, high vs. low analysis

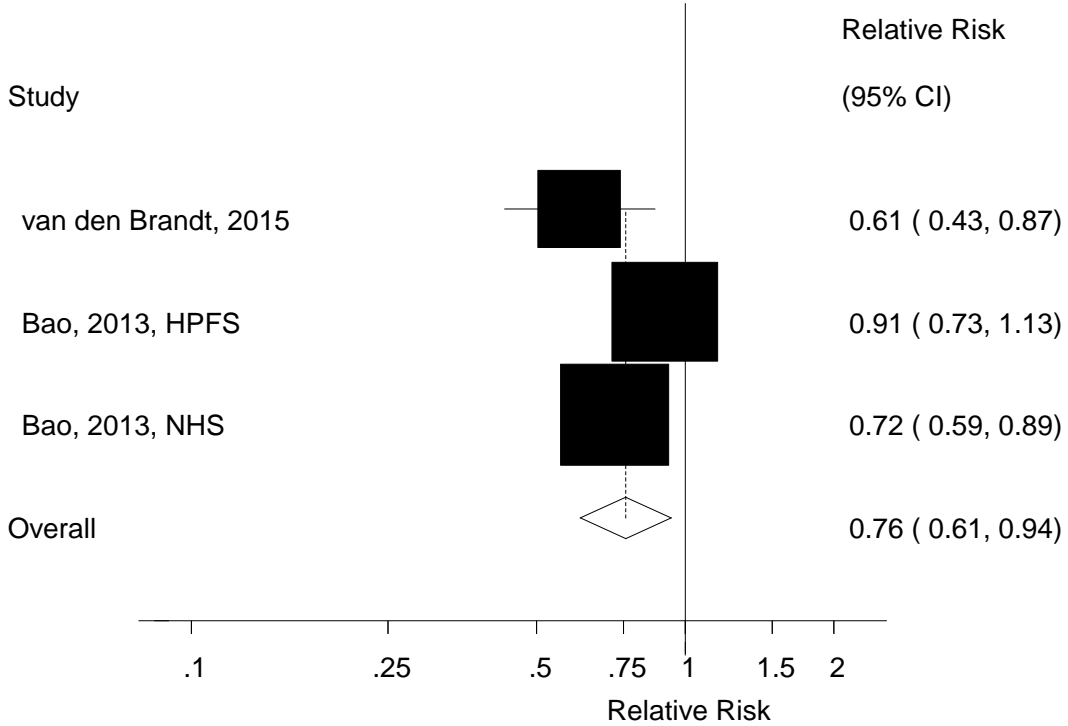

Supplementary Figure 7. Nuts and diabetes mortality, high vs. low analysis

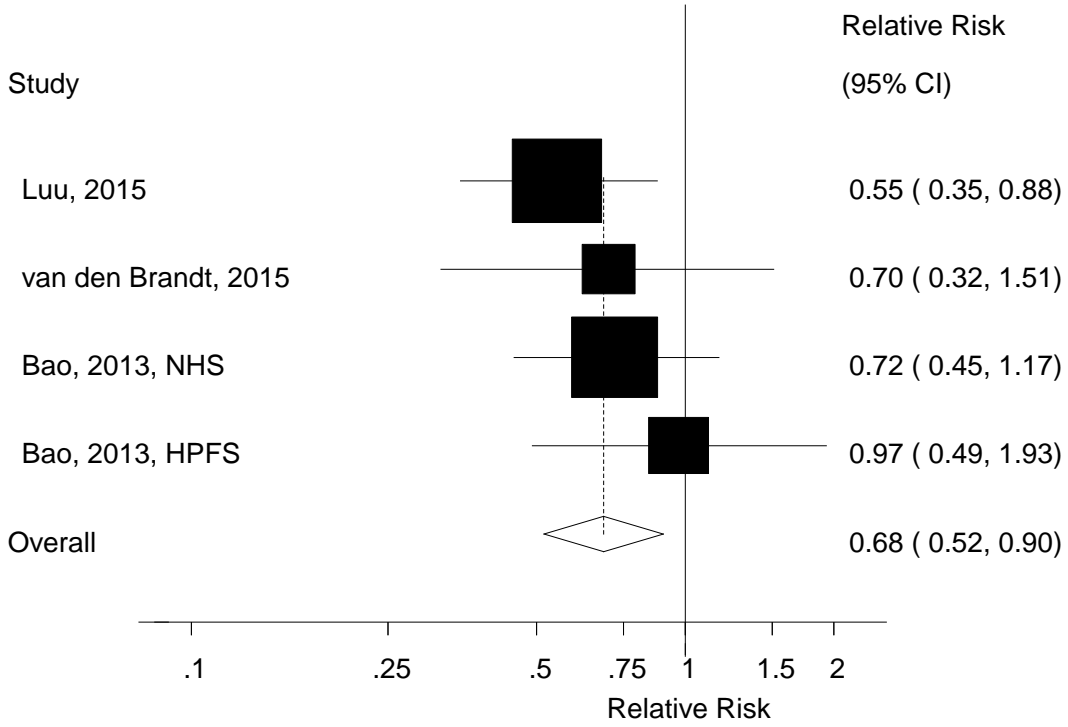

Supplementary Figure 8. Nuts and neurodegenerative disease mortality, high vs. low analysis

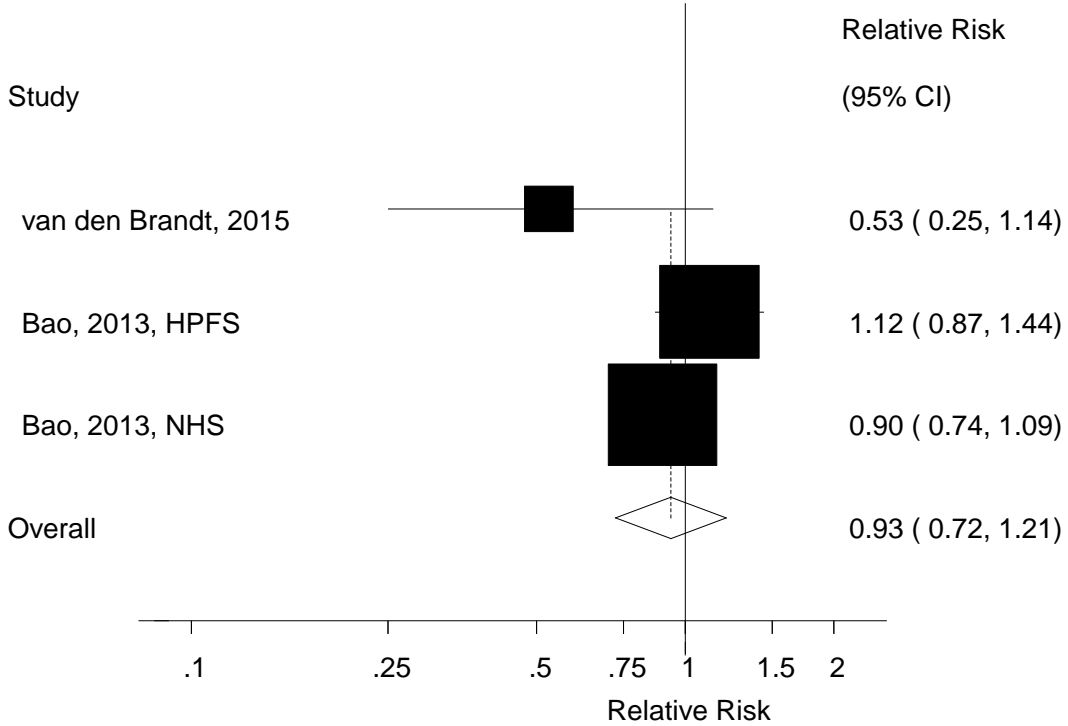

Supplementary Figure 9. Nuts and infectious disease mortality, high vs. low analysis

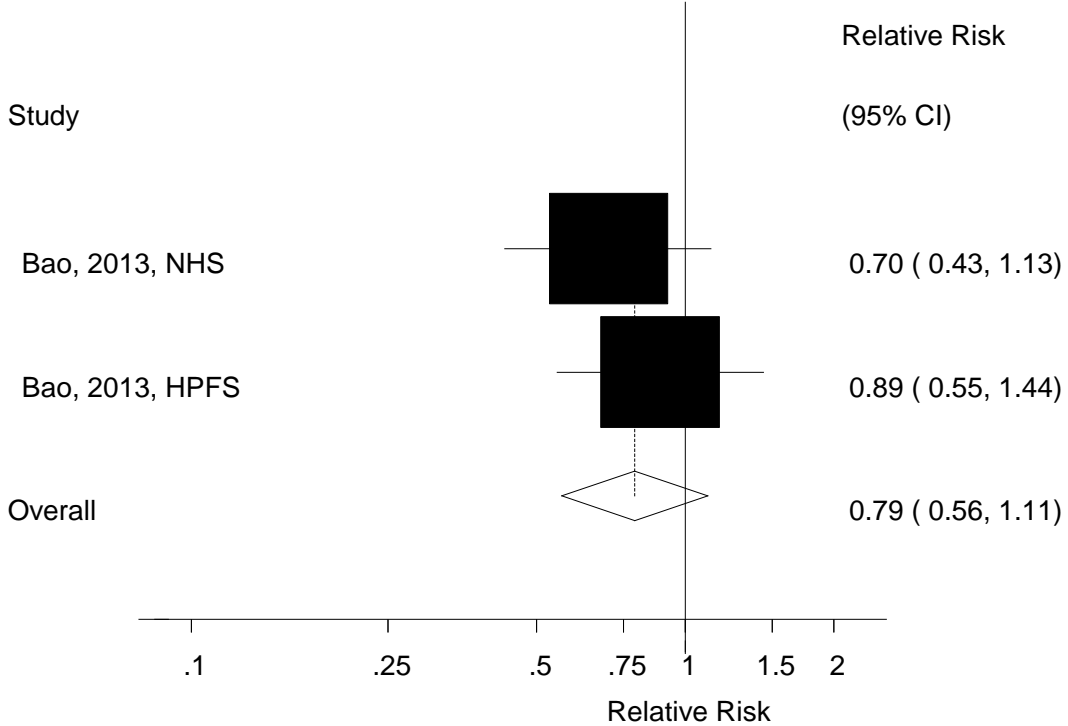

Supplementary Figure 10. Nuts and kidney disease mortality, high vs. low analysis

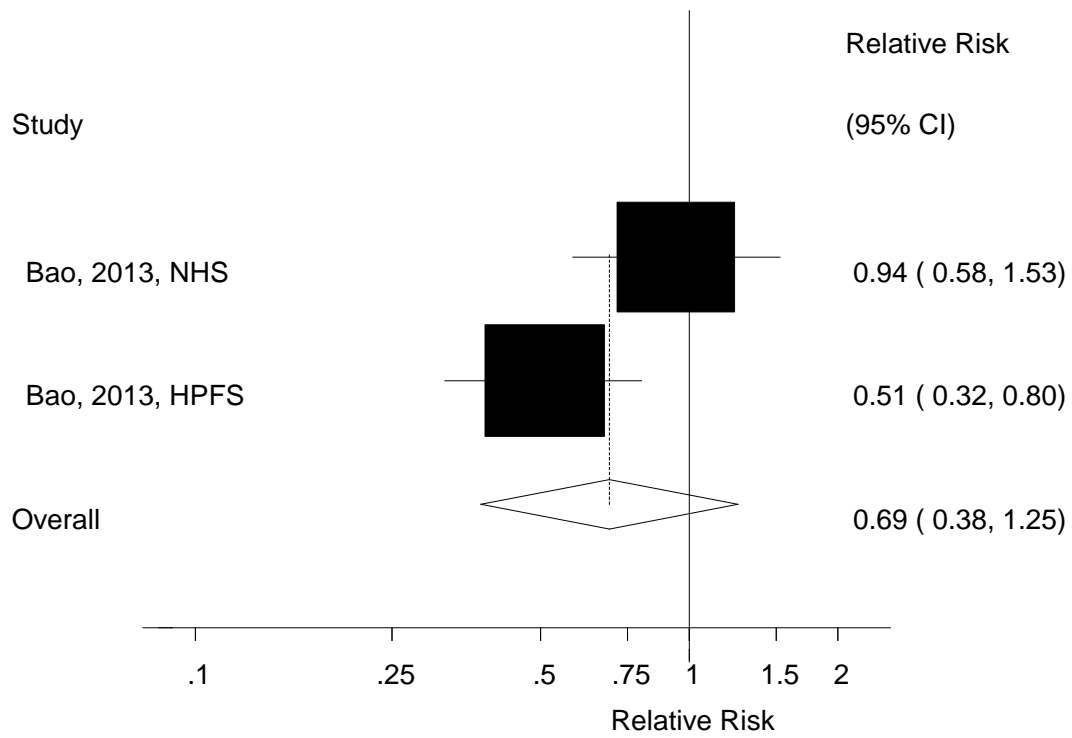

Supplementary Figure 11. Tree nuts and coronary heart disease, high vs. low analysis

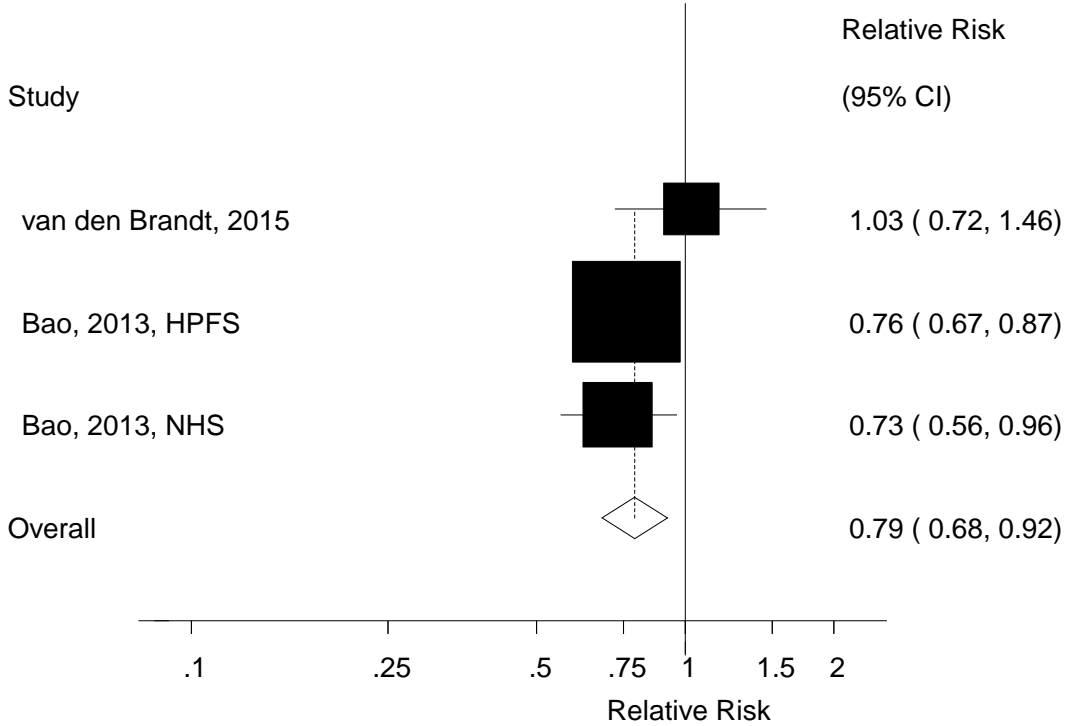

Supplementary Figure 12. Tree nuts and coronary heart disease, dose-response analysis, per 10 g/d

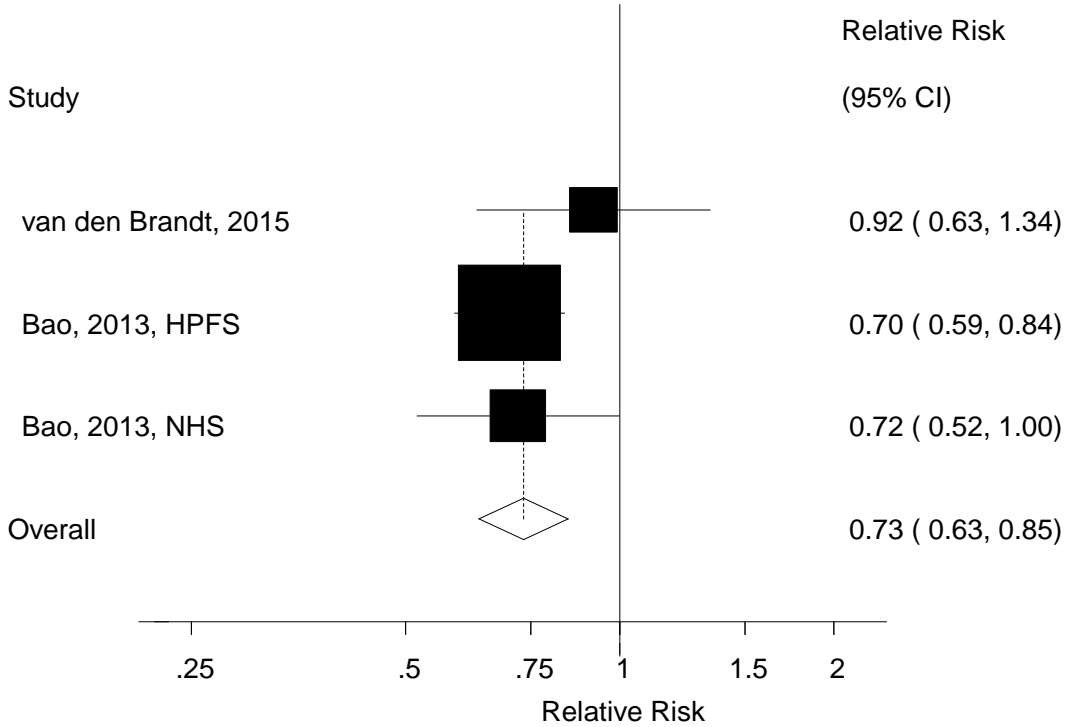

Supplementary Figure 13. Tree nuts and coronary heart disease, nonlinear dose-response analysis

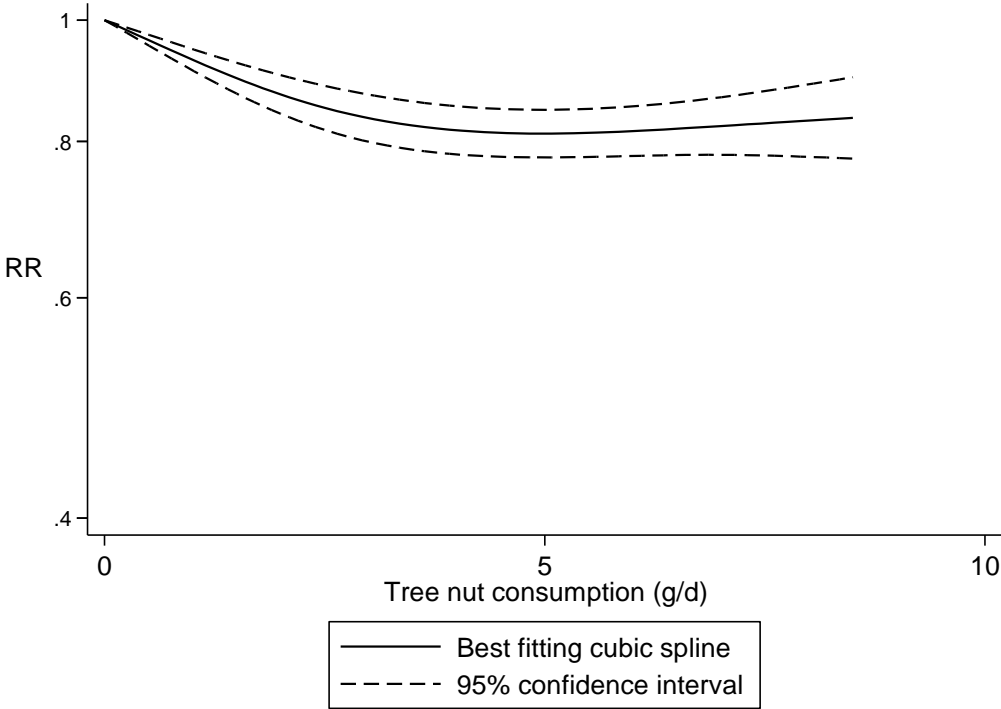

$p_{\text{nonlinearity}} < 0.0001$

Supplementary Figure 14. Peanuts and coronary heart disease, high vs. low analysis

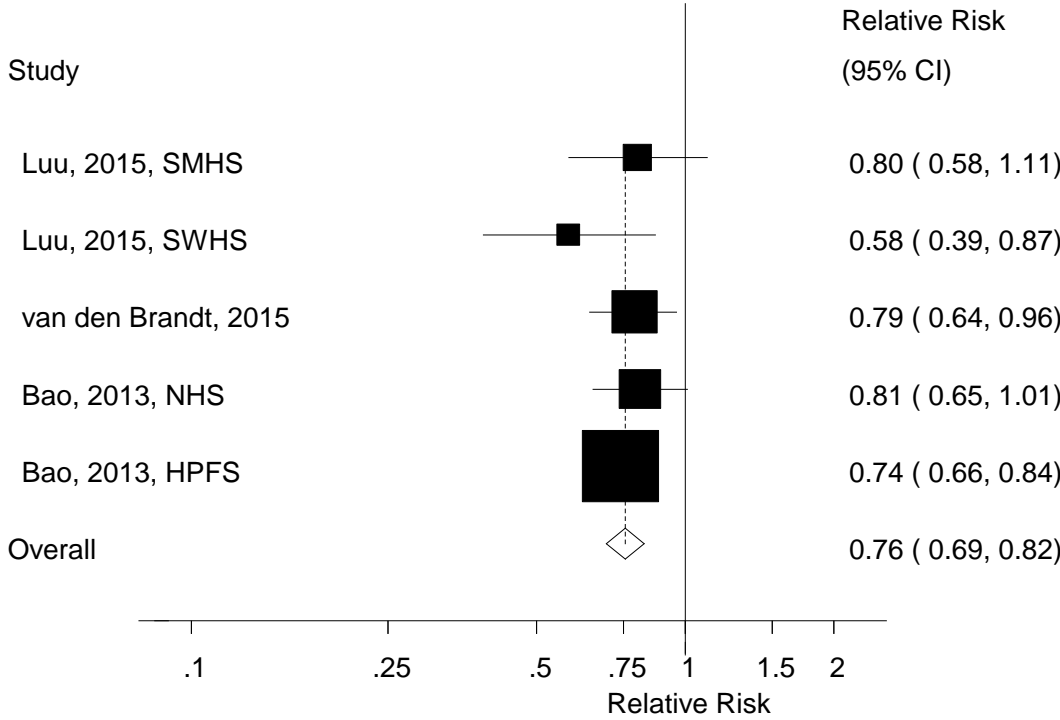

Supplementary Figure 15. Peanuts and coronary heart disease, dose-response analysis, per 10

g/d

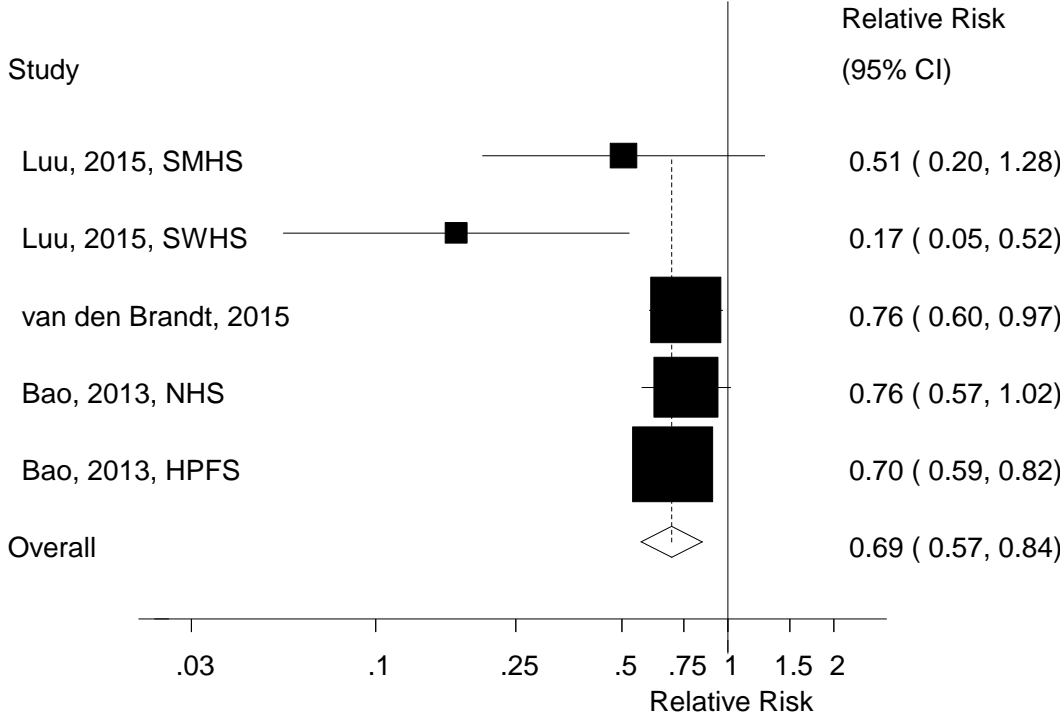



Supplementary Figure 16. Peanuts and coronary heart disease, nonlinear dose-response

analysis

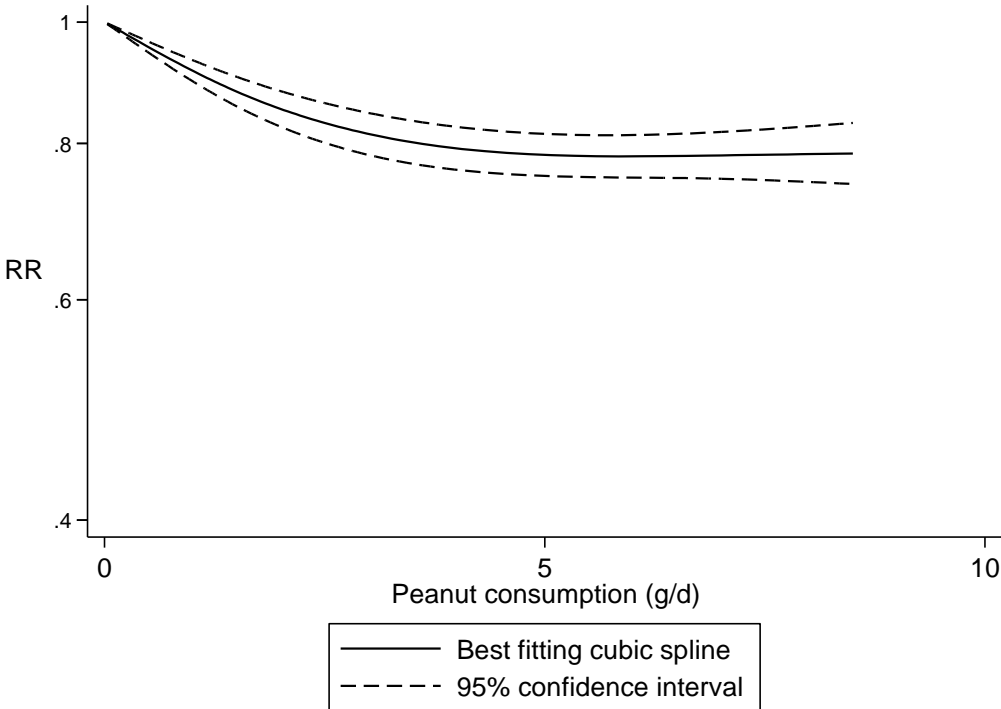

$p_{\text{nonlinearity}} < 0.0001$

Supplementary Figure 17. Tree nuts and stroke, high vs. low analysis

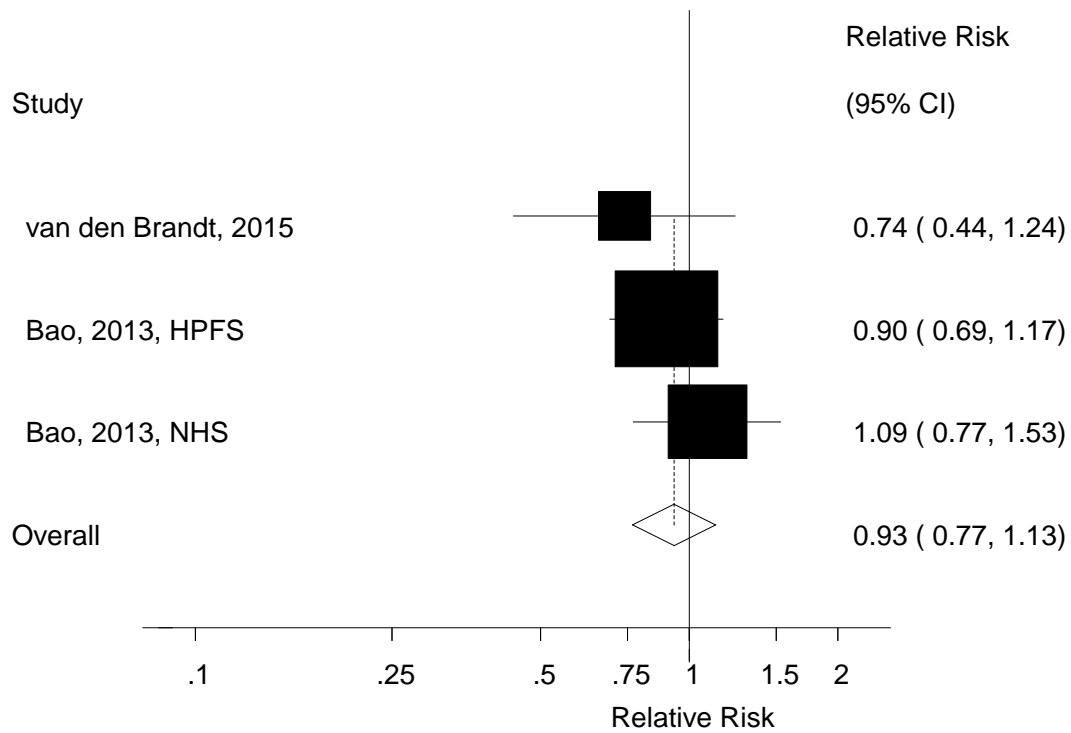

Supplementary Figure 18. Tree nuts and stroke, dose-response analysis, per 10 g/d

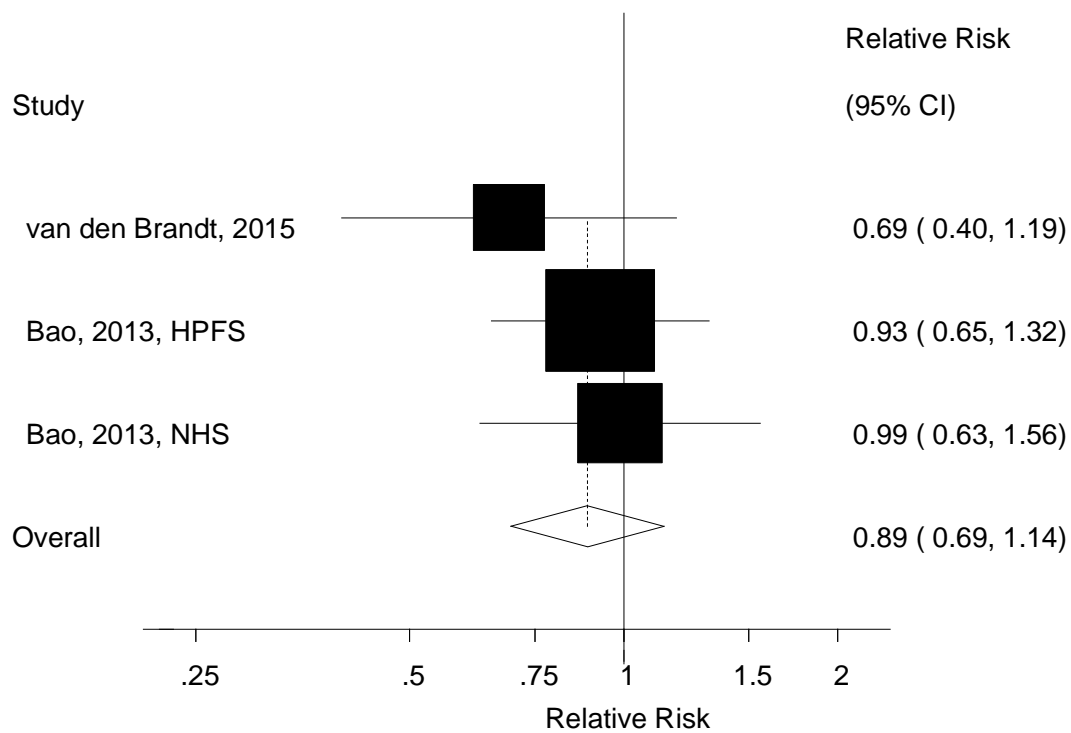

Supplementary Figure 19. Tree nuts and stroke, nonlinear dose-response analysis

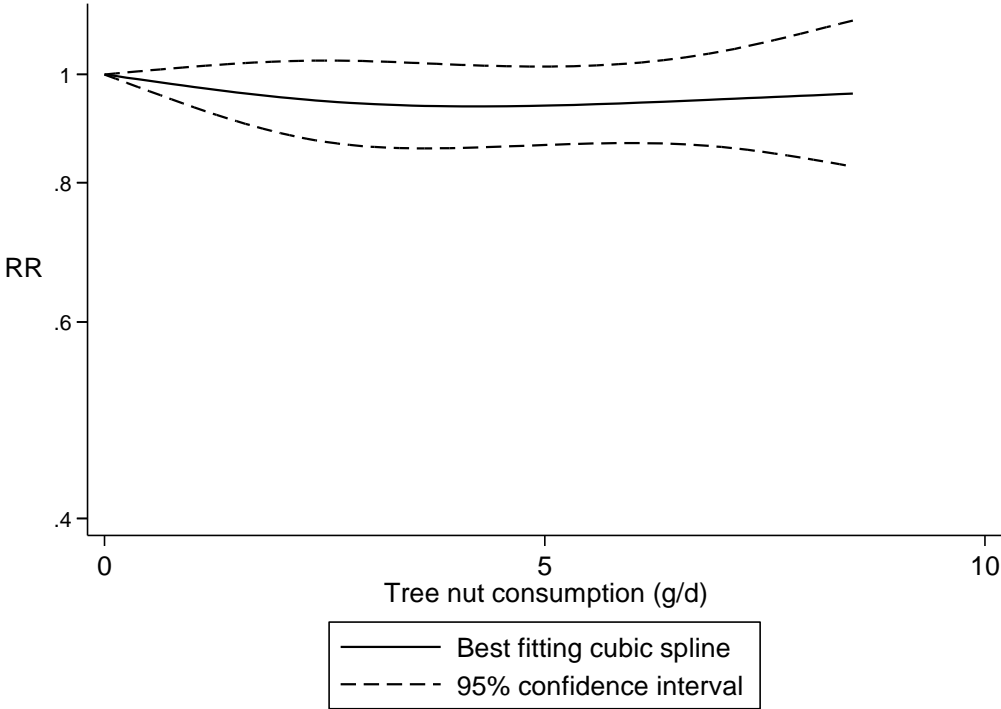

$p_{\text{nonlinearity}}=0.43$

Supplementary Figure 20. Peanuts and stroke, high vs. low analysis

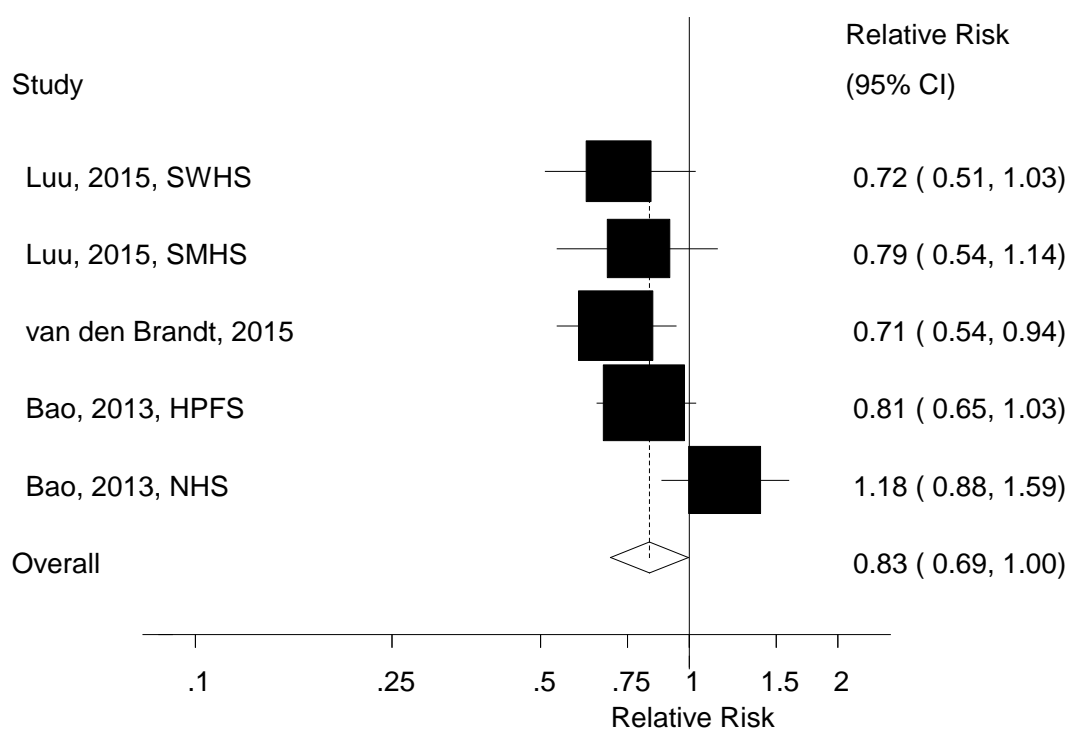

Supplementary Figure 21. Peanuts and stroke, dose-response analysis

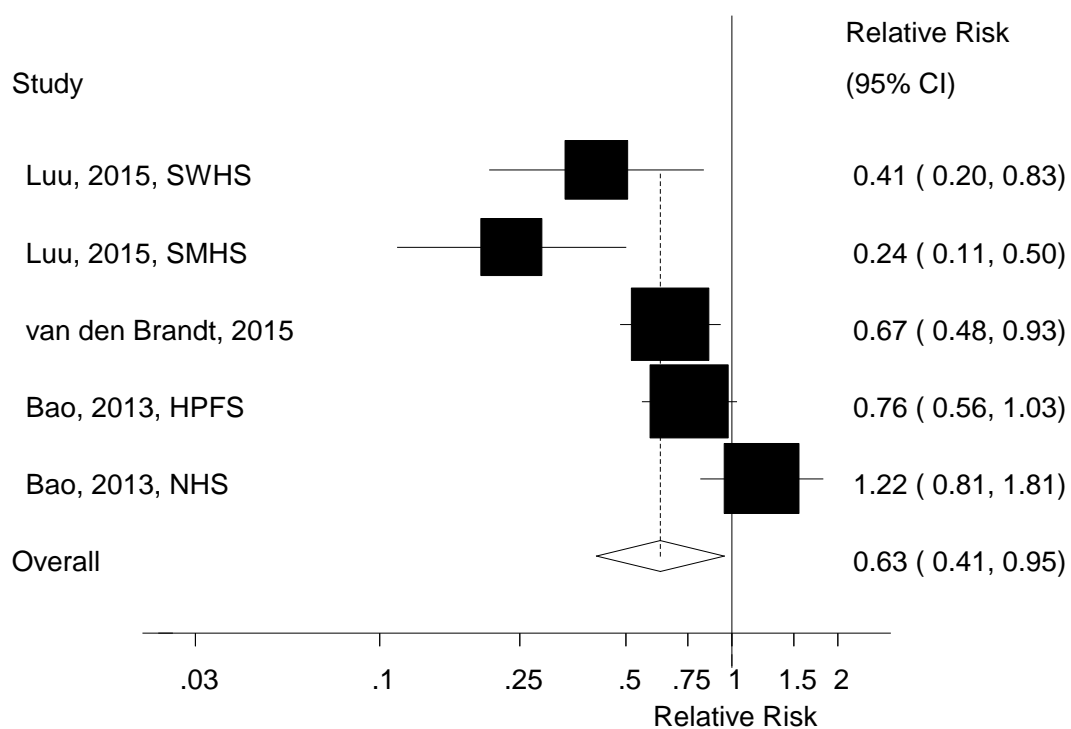

Supplementary Figure 22. Peanuts and stroke, nonlinear dose-response analysis

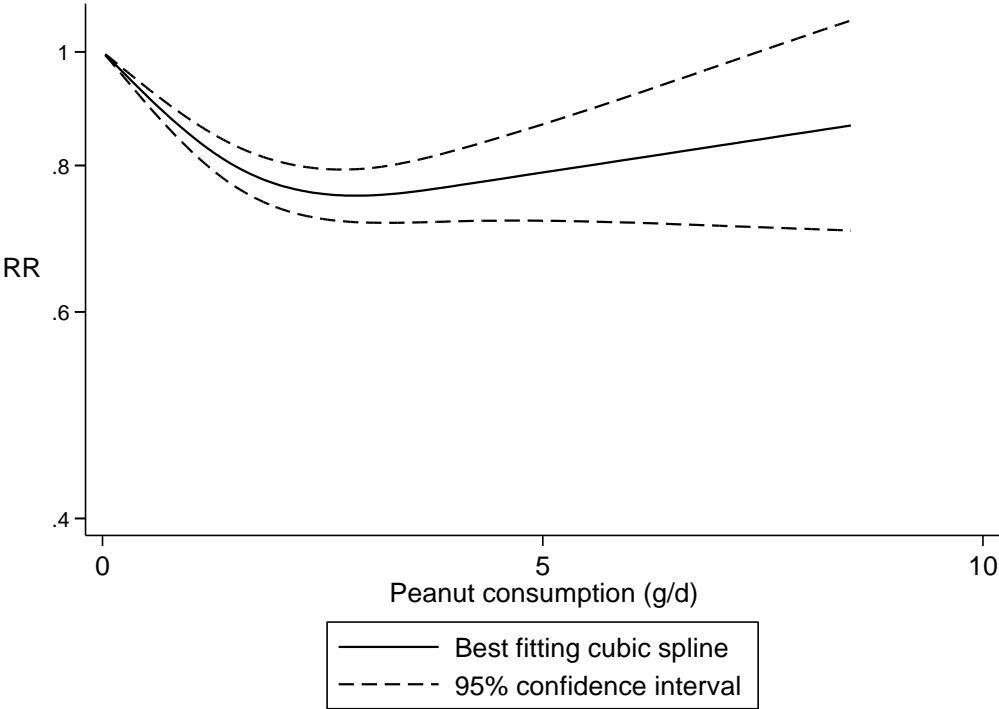

$p_{\text{nonlinearity}} < 0.0001$

Supplementary Figure 23. Tree nuts and cardiovascular disease, high vs. low analysis

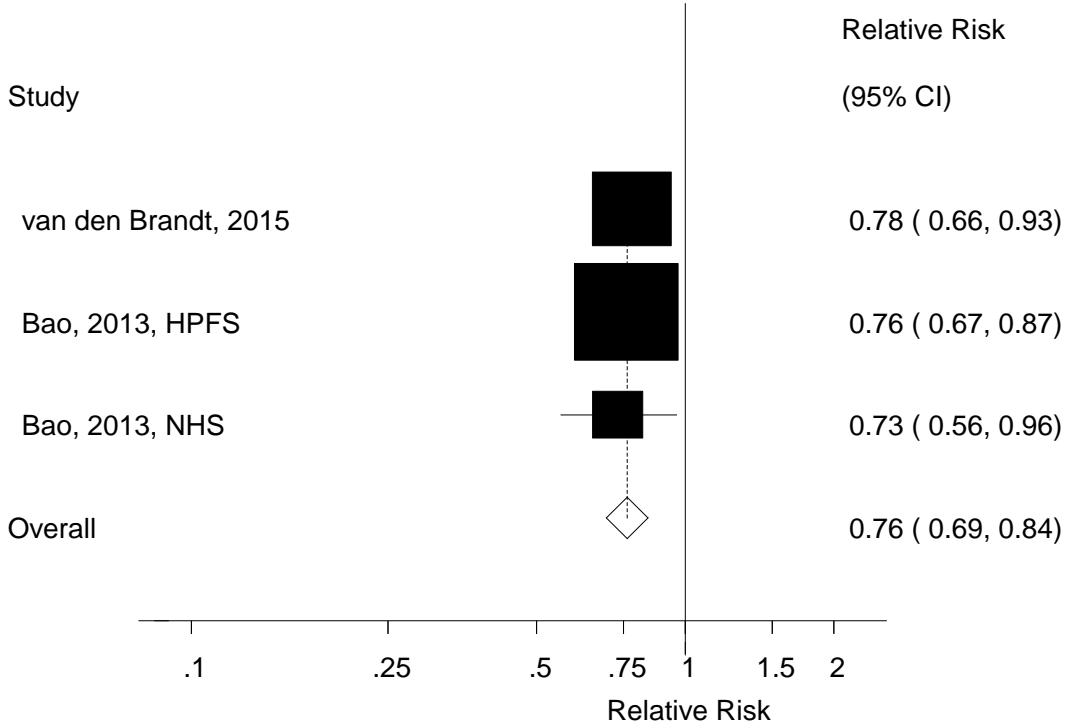

Supplementary Figure 24. Tree nuts and cardiovascular disease, dose-response analysis, per 10 g/d

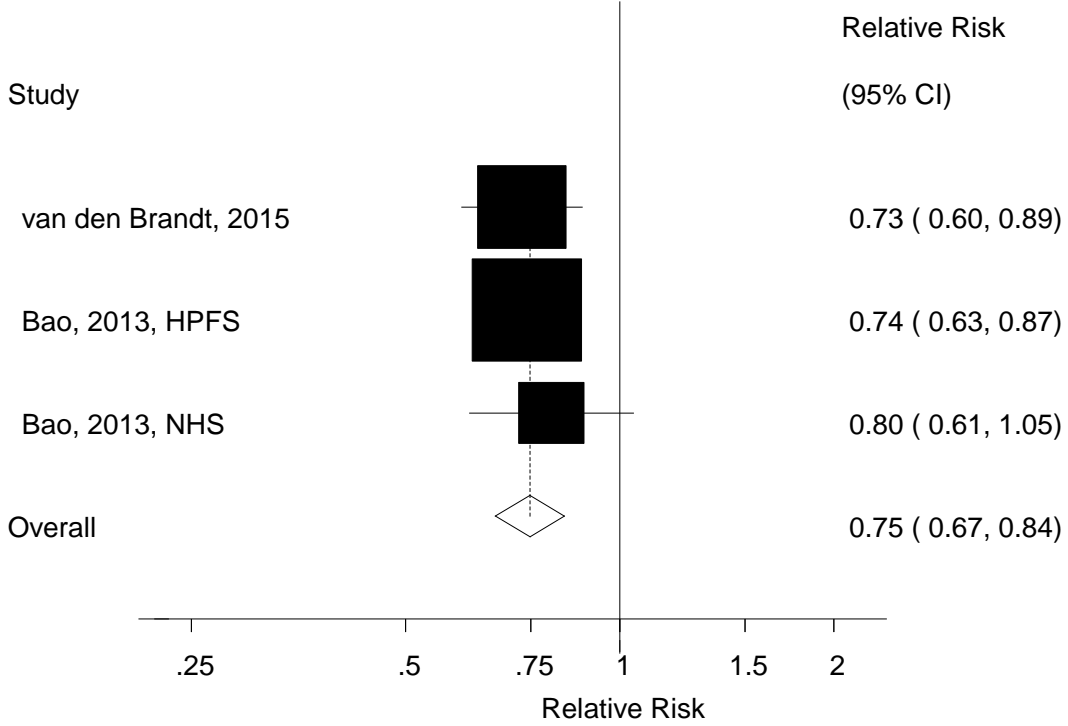

Supplementary Figure 25. Tree nuts and cardiovascular disease, nonlinear dose-response analysis

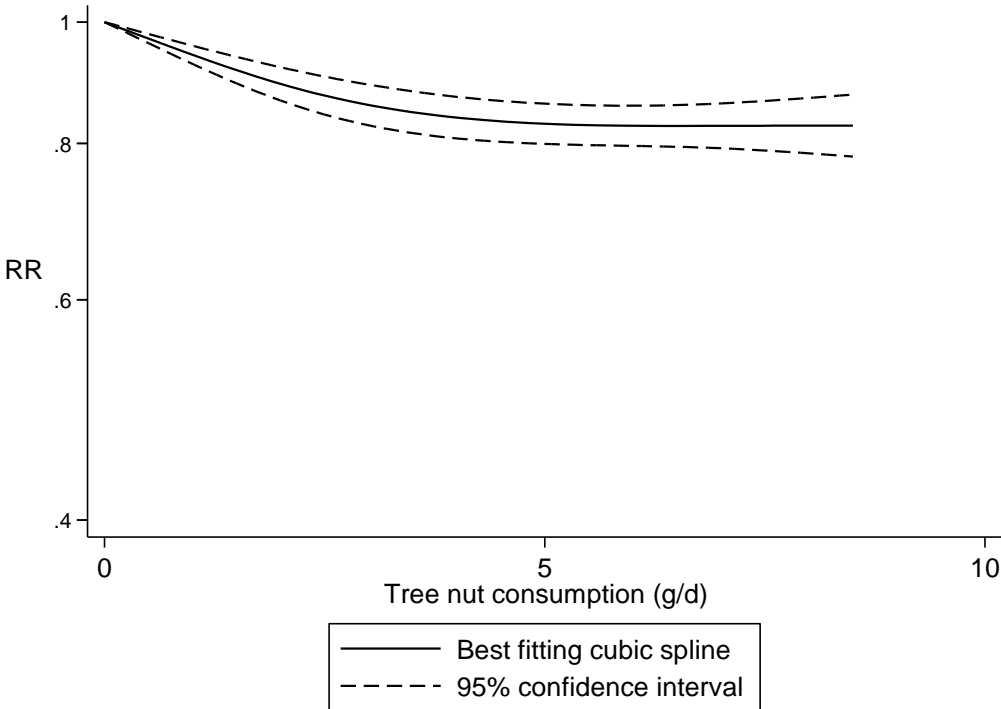

$p_{\text{nonlinearity}} < 0.0001$

Supplementary Figure 26. Peanuts and cardiovascular disease, high vs. low analysis

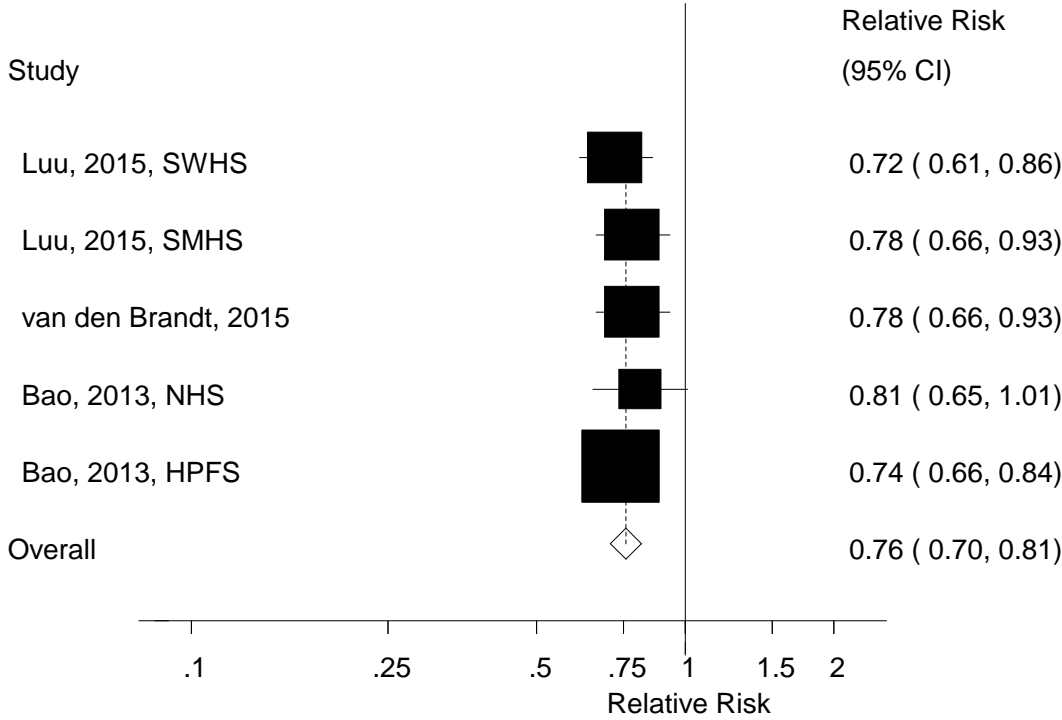

Supplementary Figure 27. Peanuts and cardiovascular disease, dose-response analysis

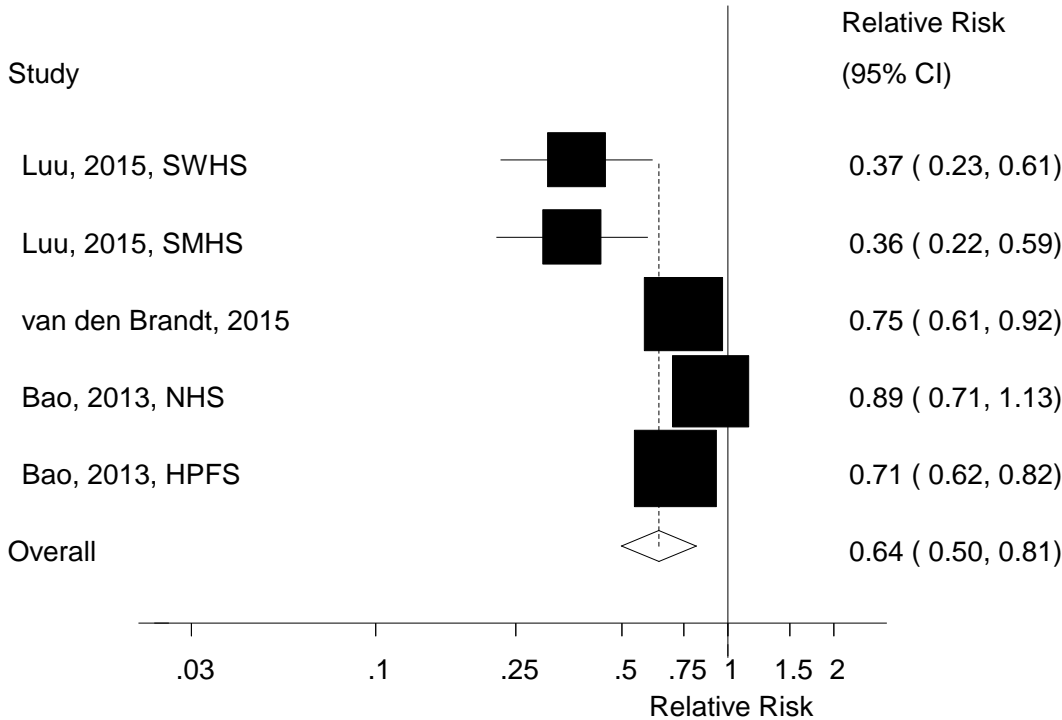



Supplementary Figure 28. Peanuts and cardiovascular disease, nonlinear dose-response analysis

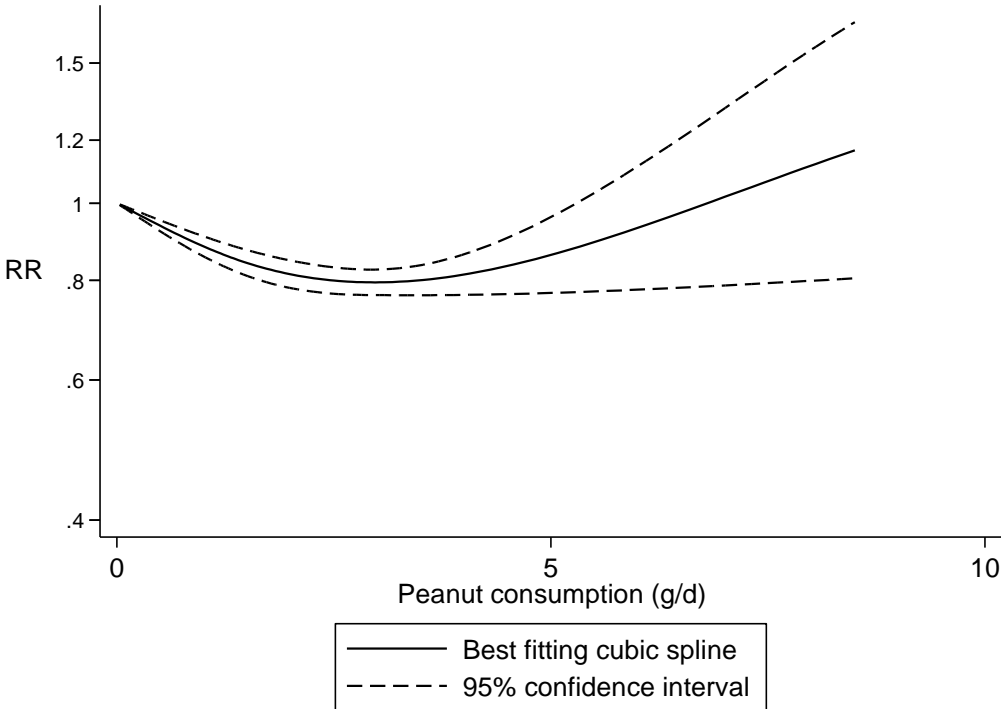

$p_{\text{nonlinearity}} < 0.0001$

Supplementary Figure 29. Tree nuts and total cancer, high vs. low analysis

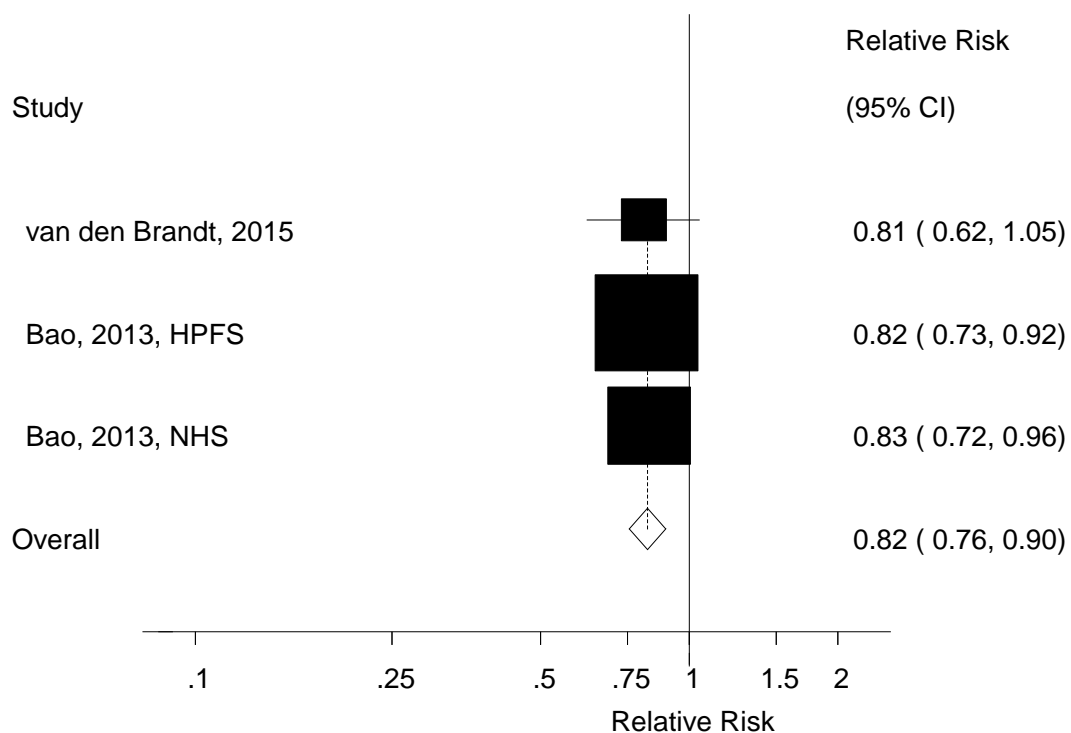

Supplementary Figure 30. Tree nuts and total cancer, dose-response analysis

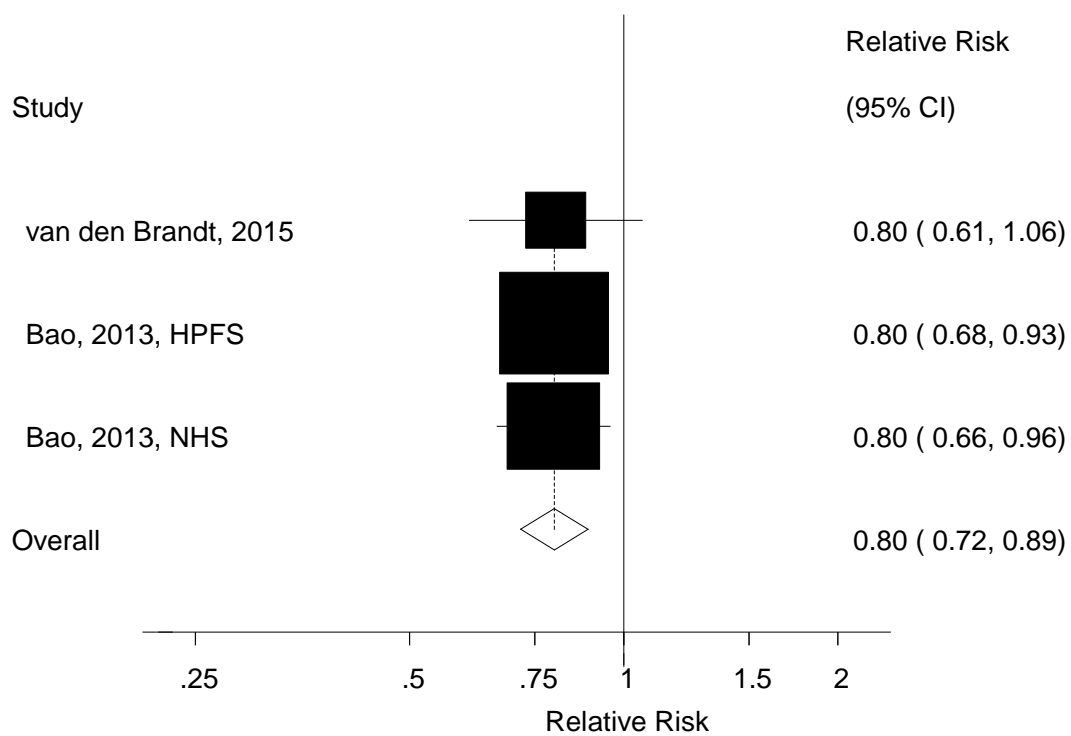

Supplementary Figure 31. Tree nuts and total cancer, nonlinear dose-response analysis

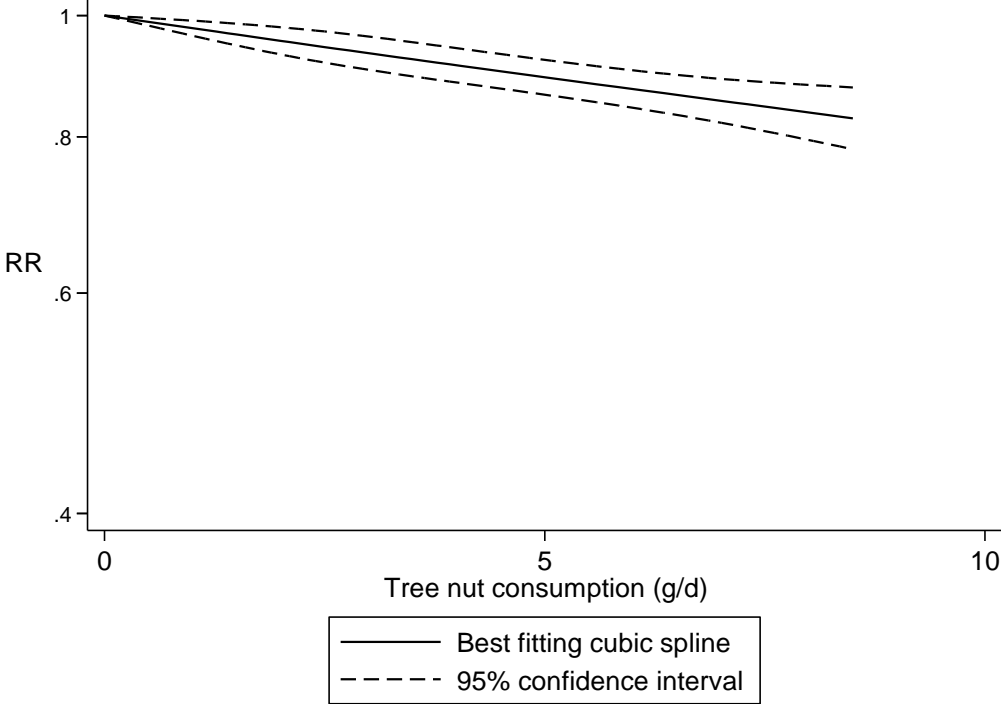

$p_{\text{nonlinearity}}=0.89$

Supplementary Figure 32. Peanuts and total cancer, high vs. low analysis

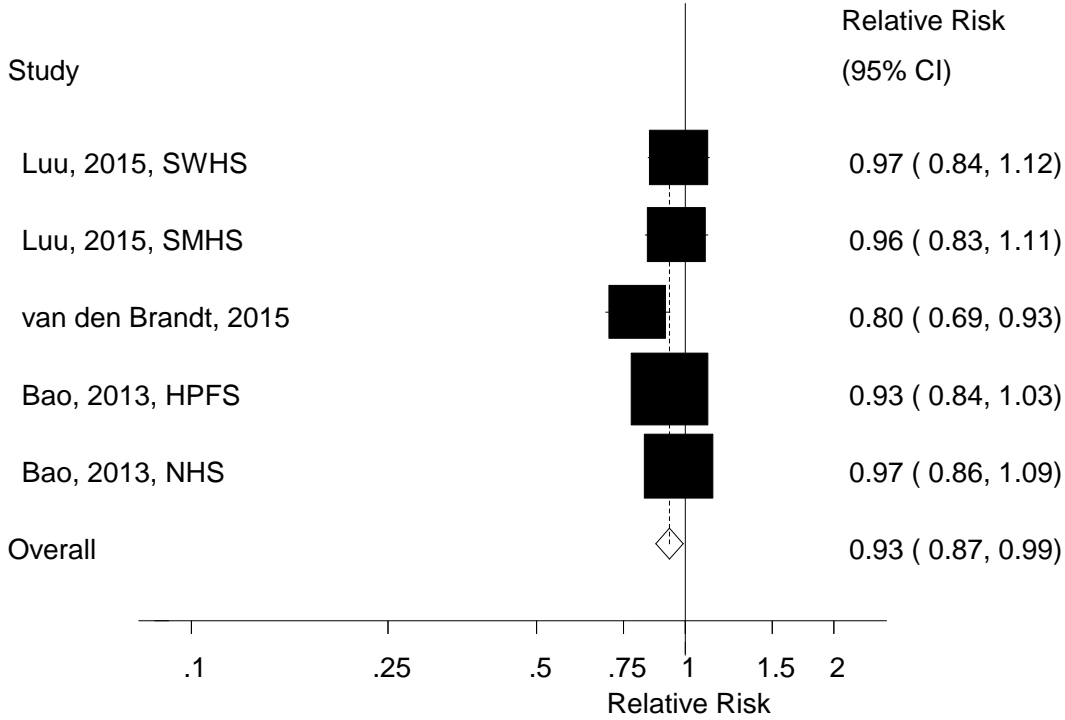

Supplementary Figure 33. Peanuts and total cancer, dose-response analysis

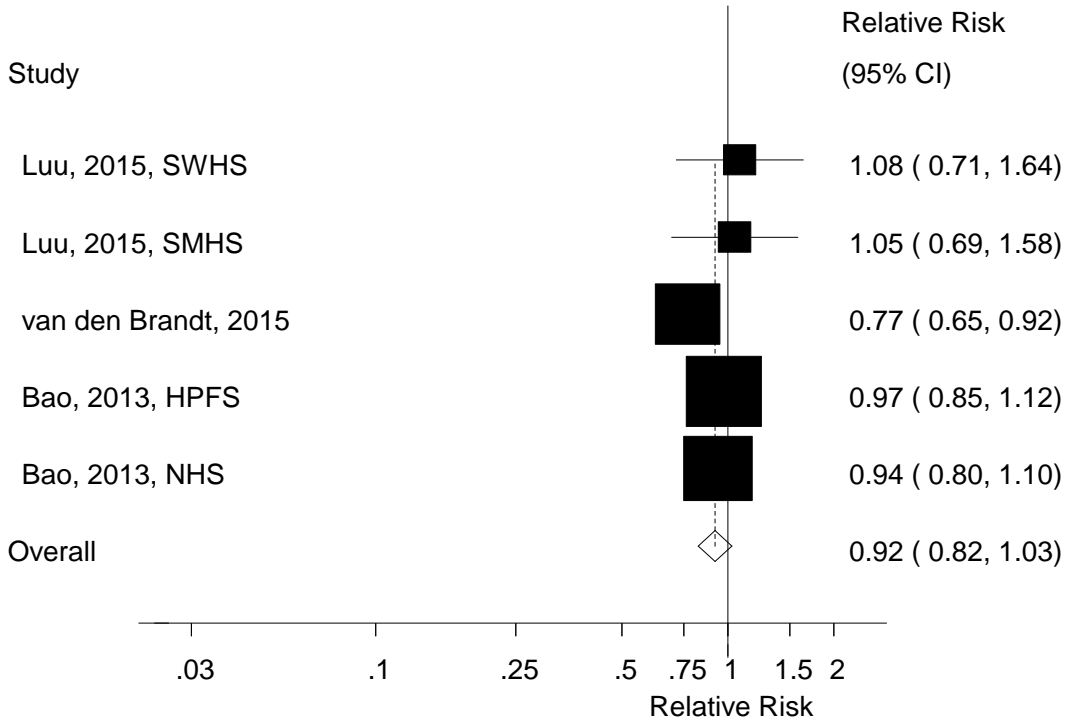

Supplementary Figure 34. Peanuts and total cancer, nonlinear dose-response analysis

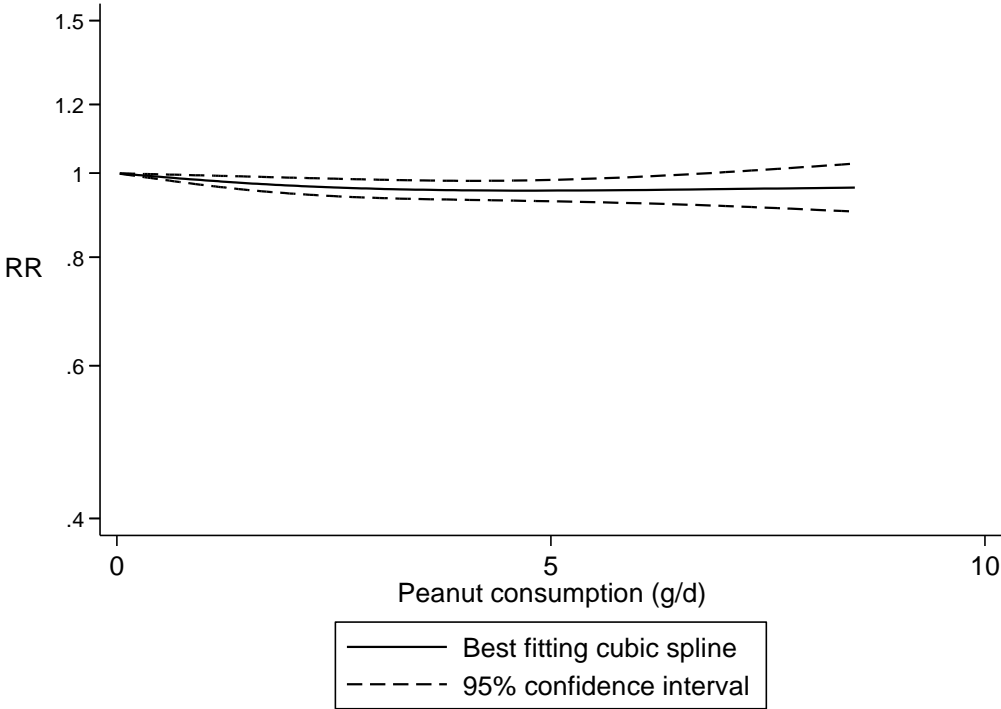

$p_{\text{nonlinearity}}=0.10$

Supplementary Figure 35. Funnel plot of nuts and all-cause mortality

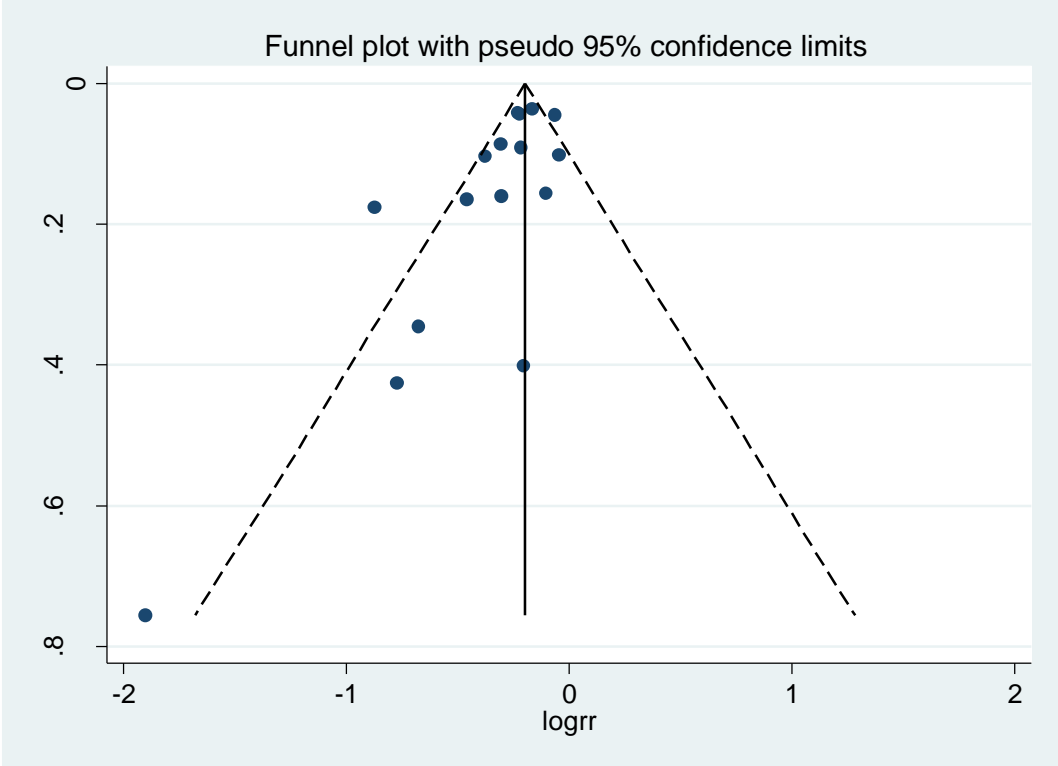

Supplementary Figure 36. Tree nuts and all-cause mortality, high vs. low analysis

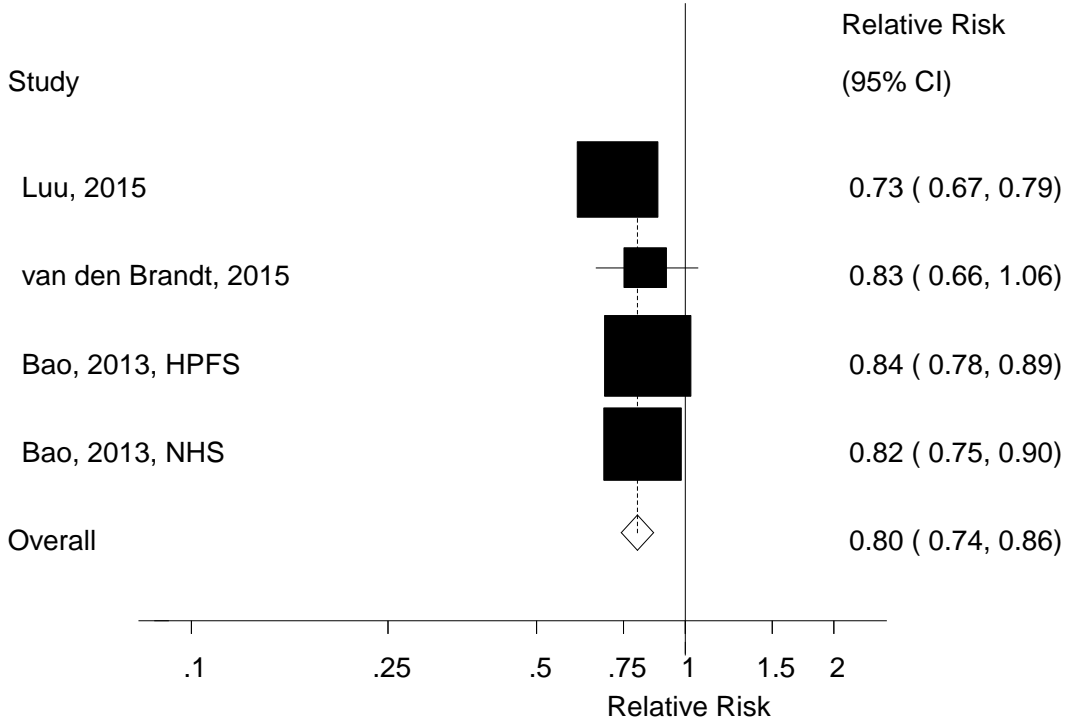

Supplementary Figure 37. Tree nuts and all-cause mortality, dose-response analysis

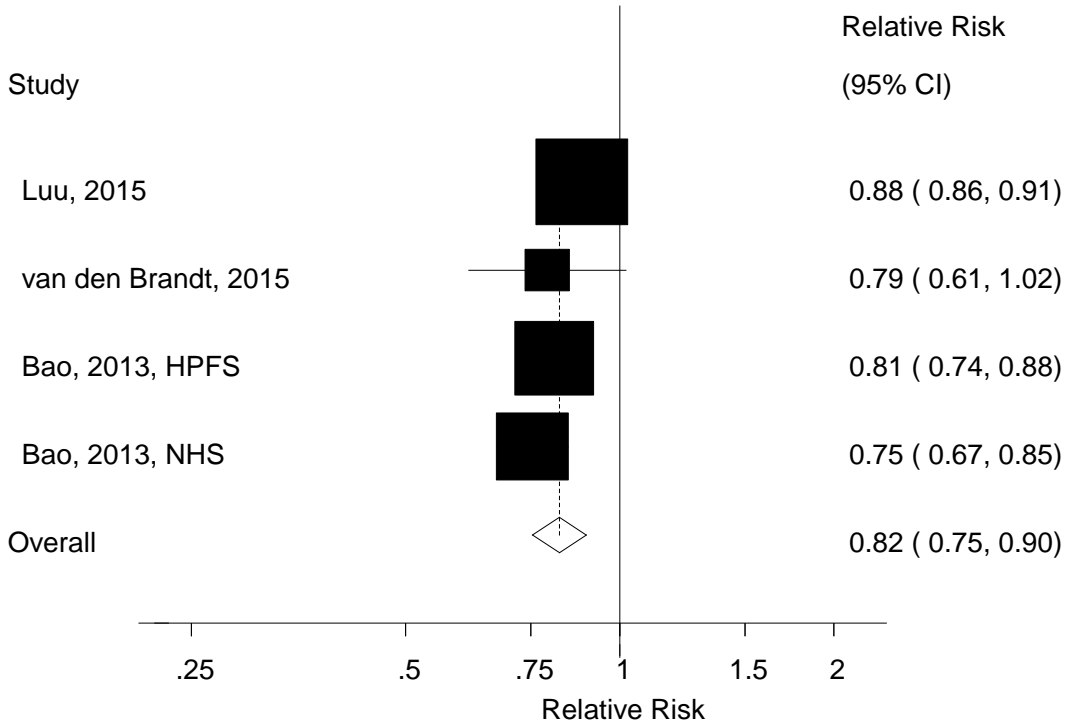

Supplementary Figure 38. Tree nuts and all-cause mortality, nonlinear dose-response analysis

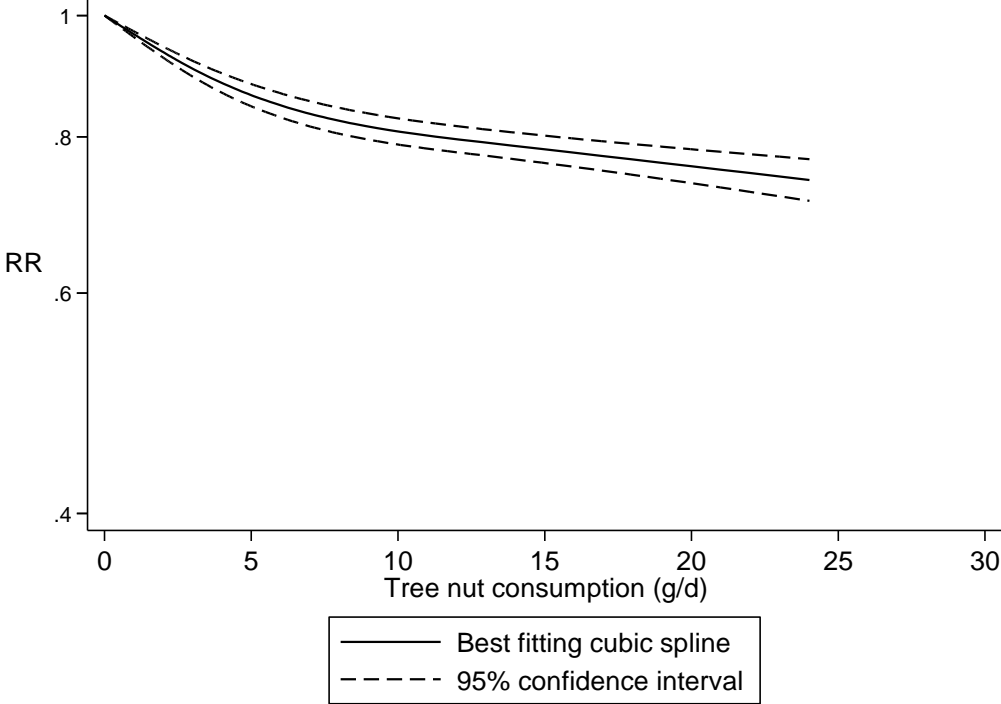

$p_{\text{nonlinearity}} < 0.0001$



Supplementary Figure 39. Peanuts and all-cause mortality, high vs. low analysis

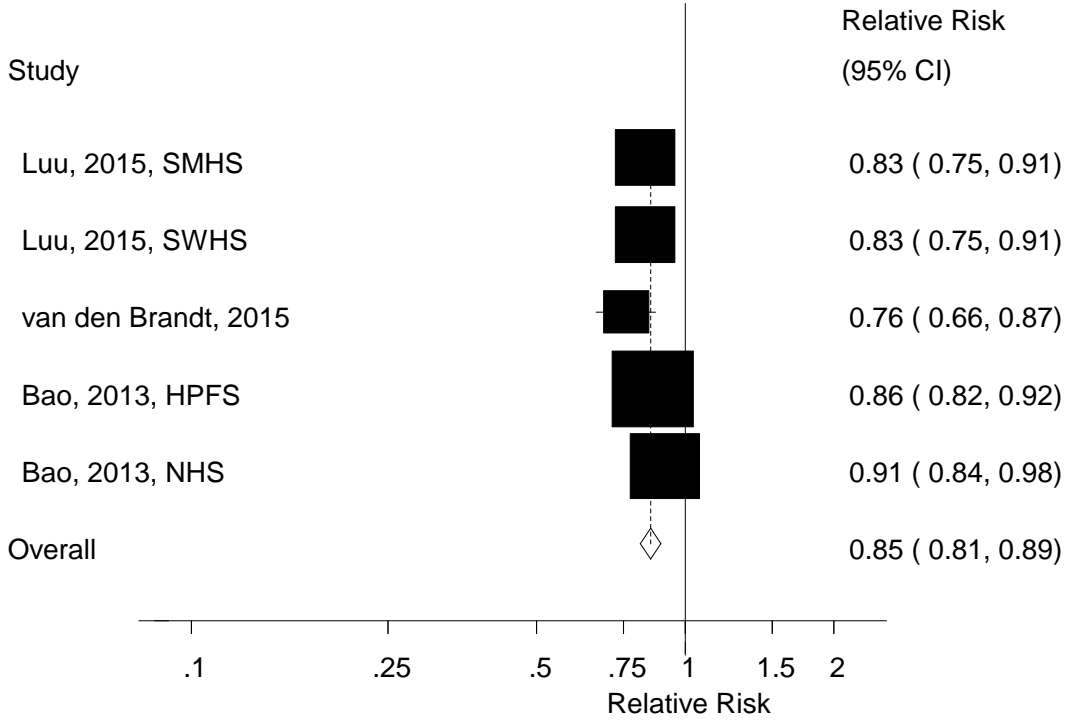

Supplementary Figure 40. Peanuts and all-cause mortality, dose-response analysis

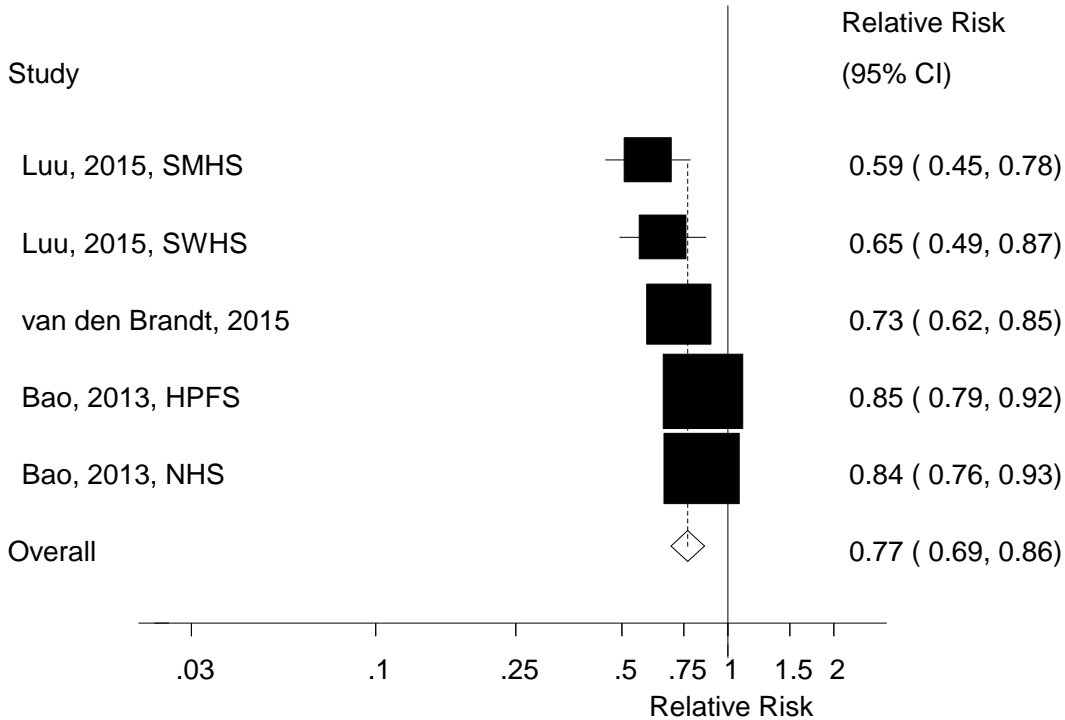

Supplementary Figure 41. Peanuts and all-cause mortality, nonlinear dose-response analysis

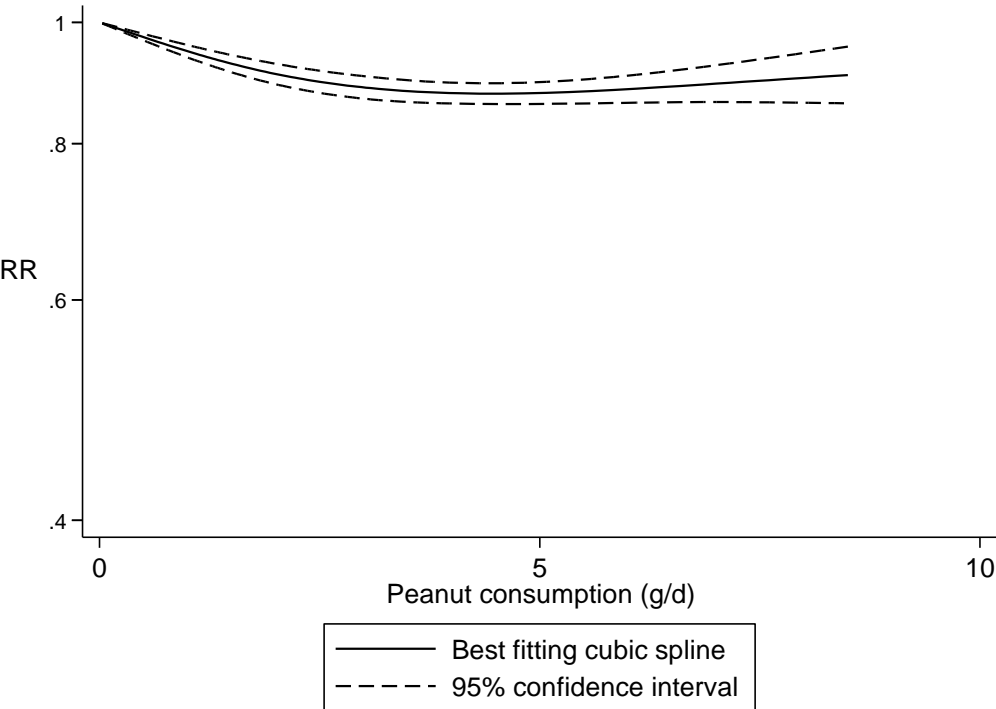

$p_{\text{nonlinearity}} < 0.0001$

Supplementary Figure 42. Peanut butter and all-cause mortality, high vs. low analysis

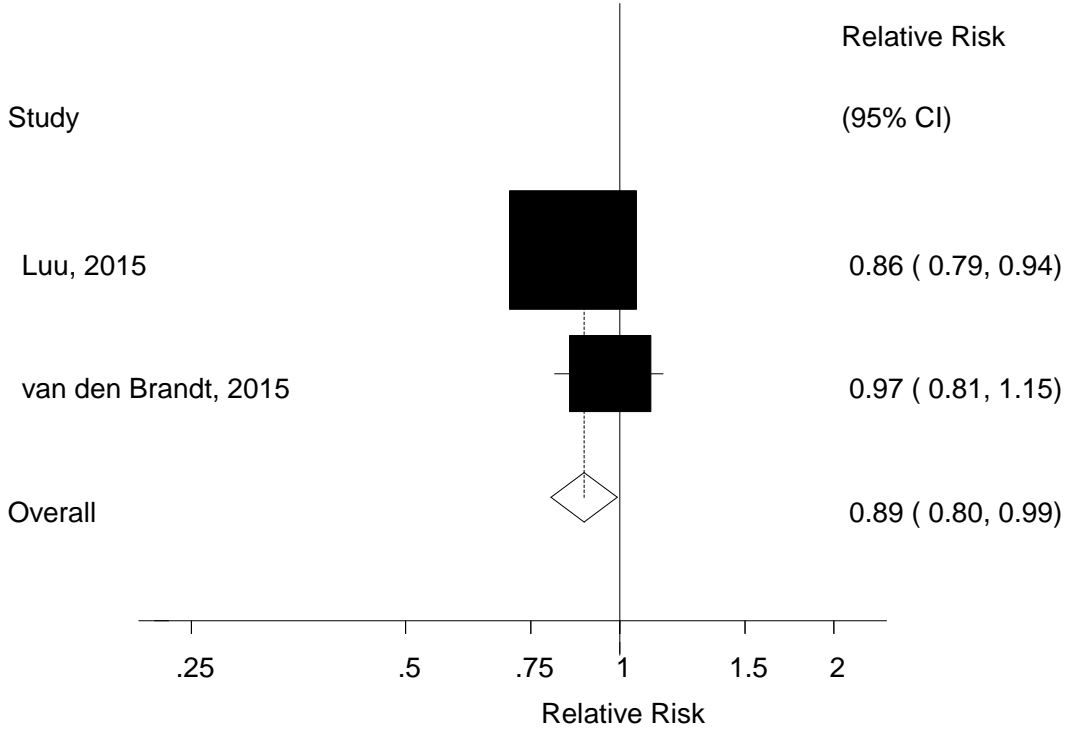

Supplementary Figure 43. Peanut butter and all-cause mortality, dose-response analysis

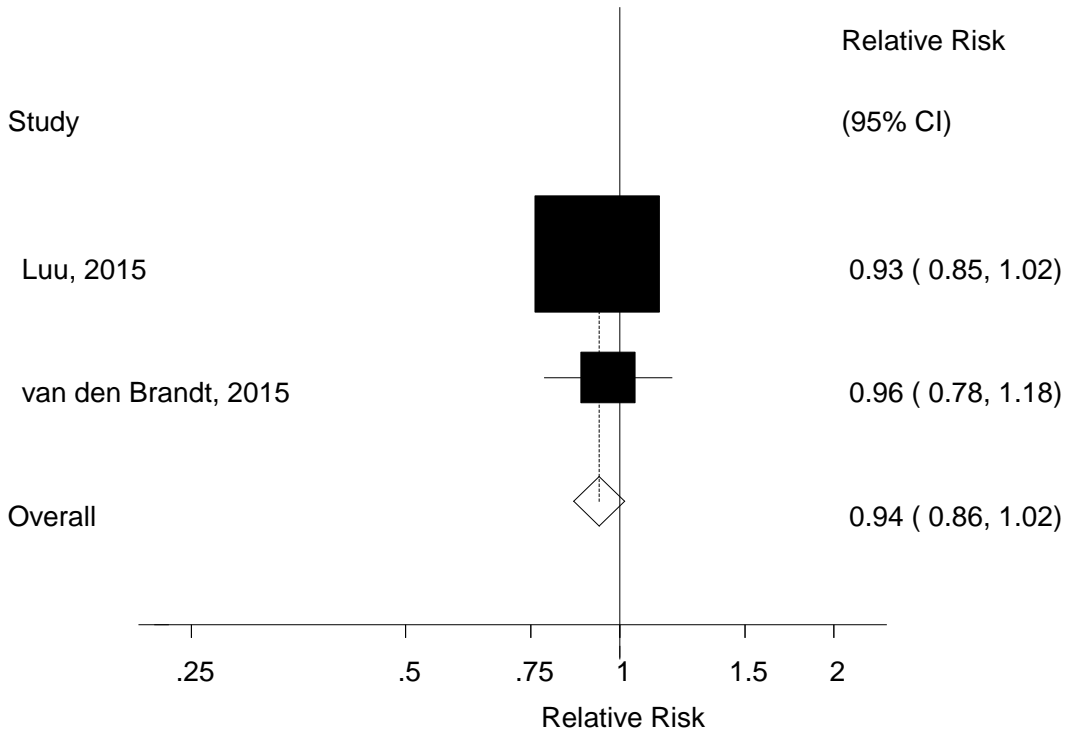

Supplementary Figure 44. Tree nuts and respiratory disease mortality, high vs. low analysis

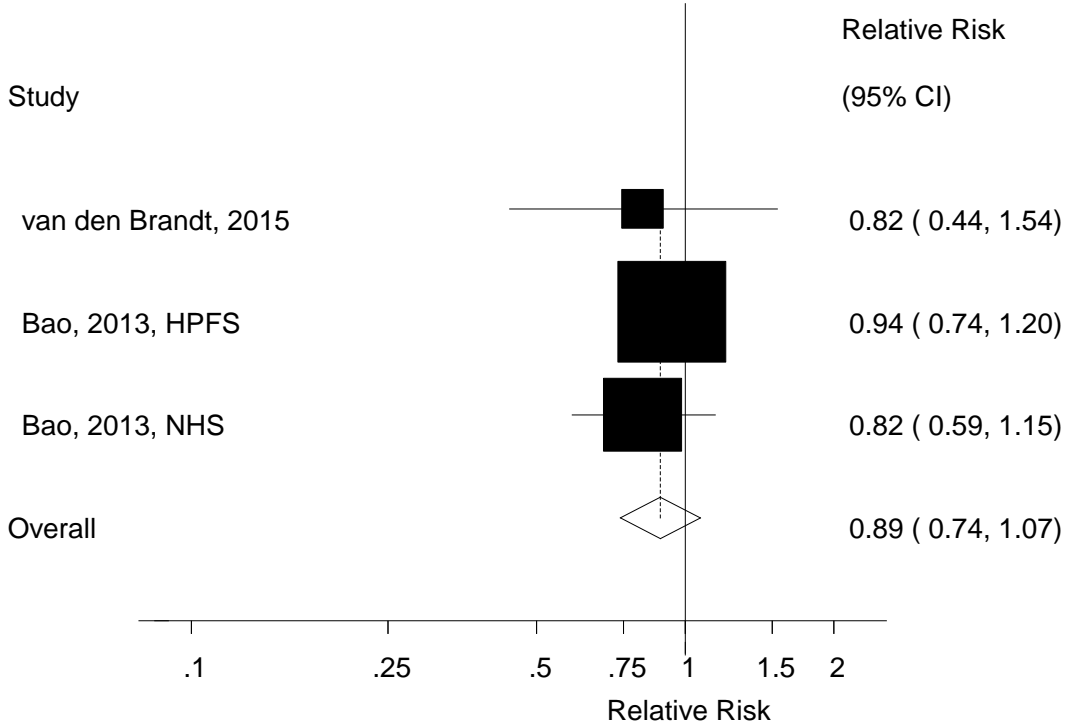

Supplementary Figure 45. Tree nuts and respiratory disease mortality, dose-response analysis

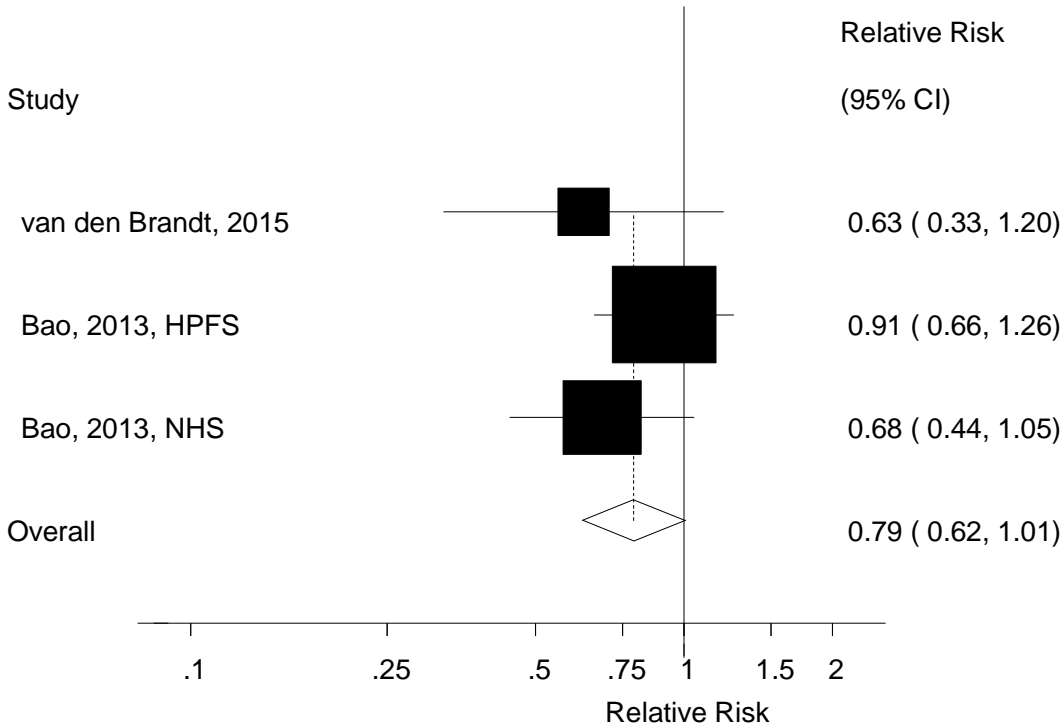

Supplementary Figure 46. Tree nuts and respiratory disease mortality, nonlinear dose-response analysis

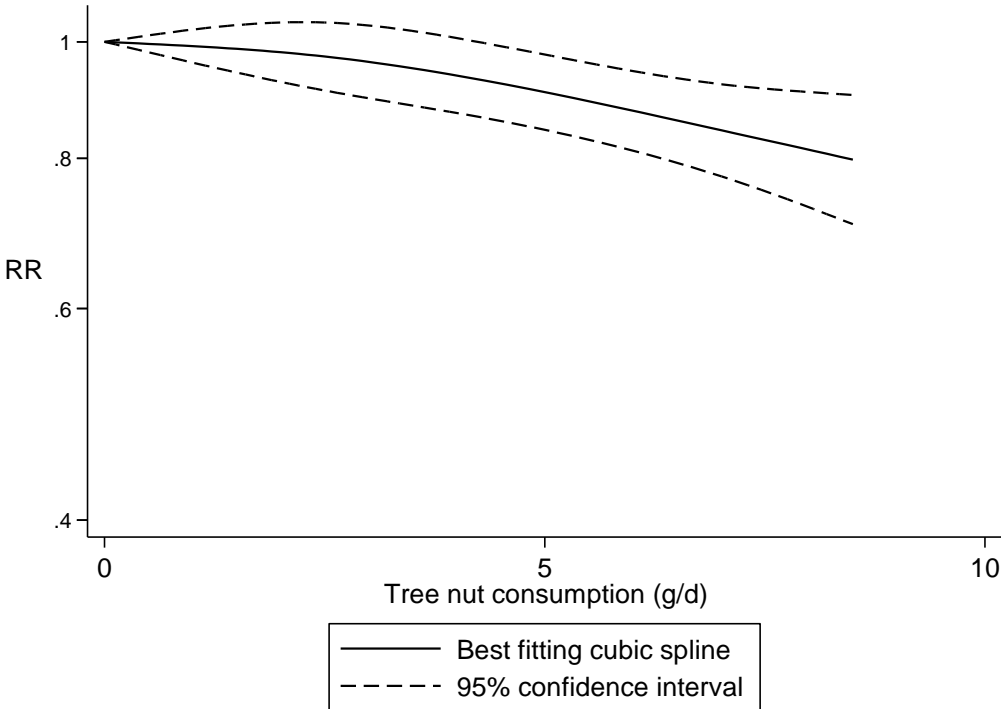

$p_{\text{nonlinearity}}=0.33$

Supplementary Figure 47. Peanuts and respiratory disease mortality, high vs. low analysis

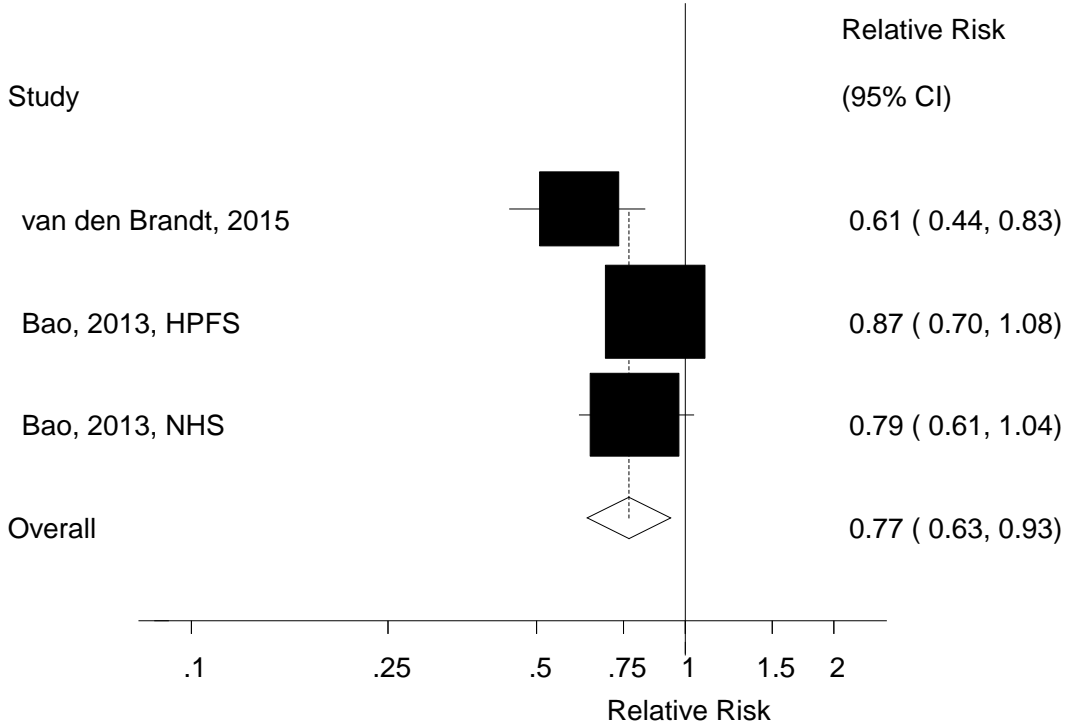

Supplementary Figure 48. Peanuts and respiratory disease mortality, dose-response analysis

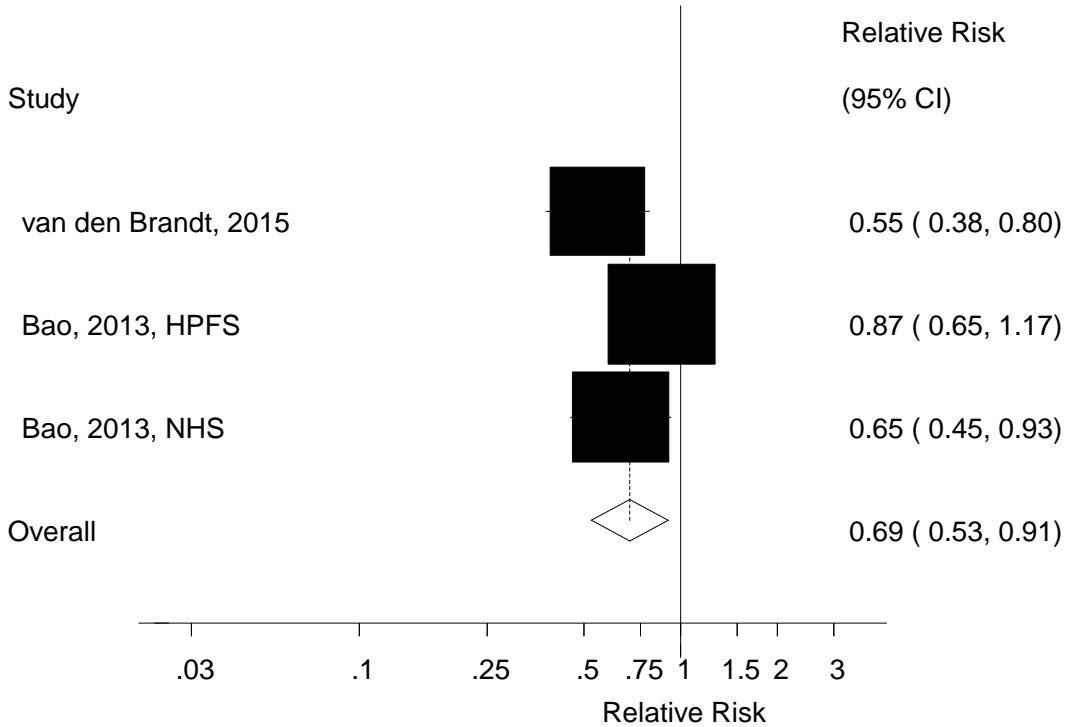

Supplementary Figure 49. Peanuts and respiratory disease mortality, nonlinear dose-response analysis

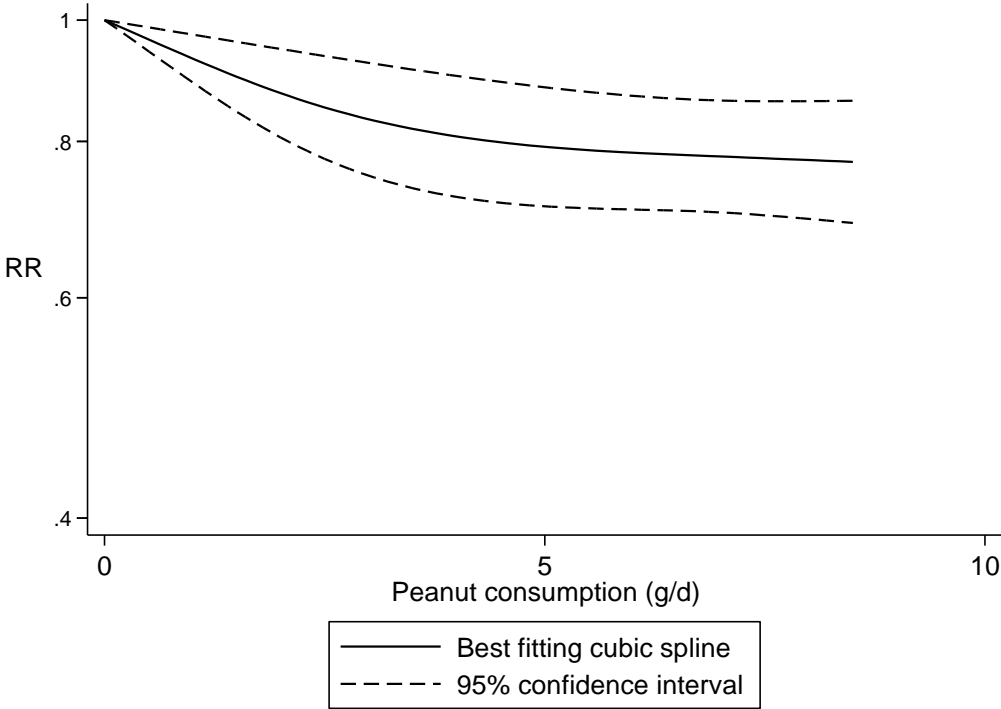

$p_{\text{nonlinearity}}=0.06$

Supplementary Figure 50. Tree nuts and diabetes mortality, high vs. low analysis

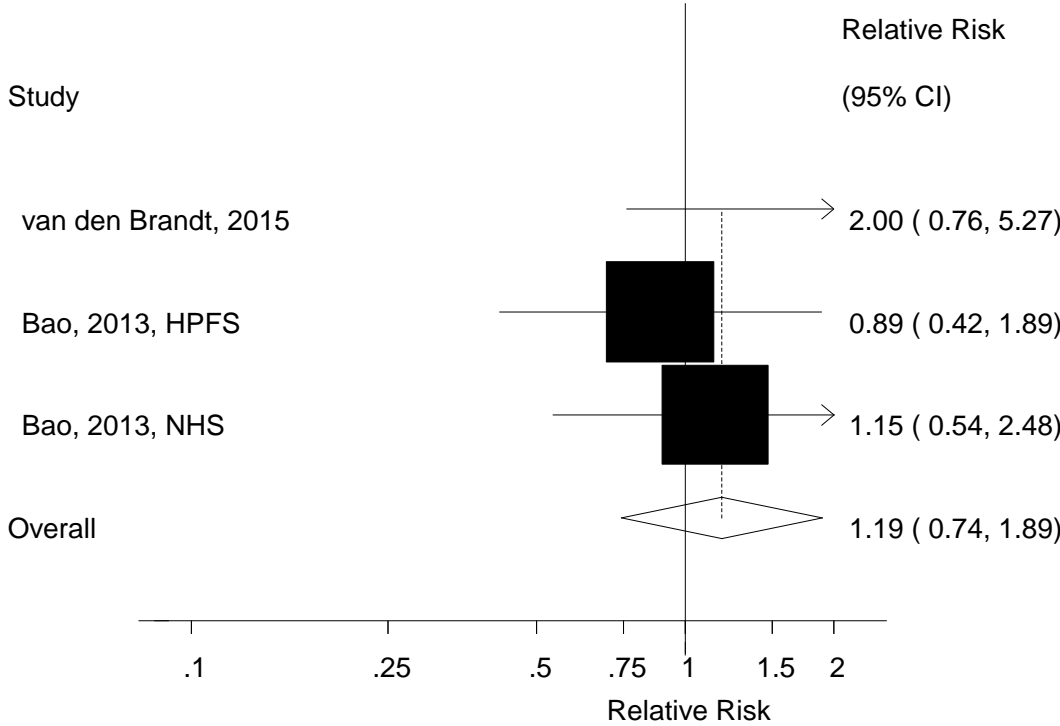

Supplementary Figure 51. Tree nuts and diabetes mortality, dose-response analysis

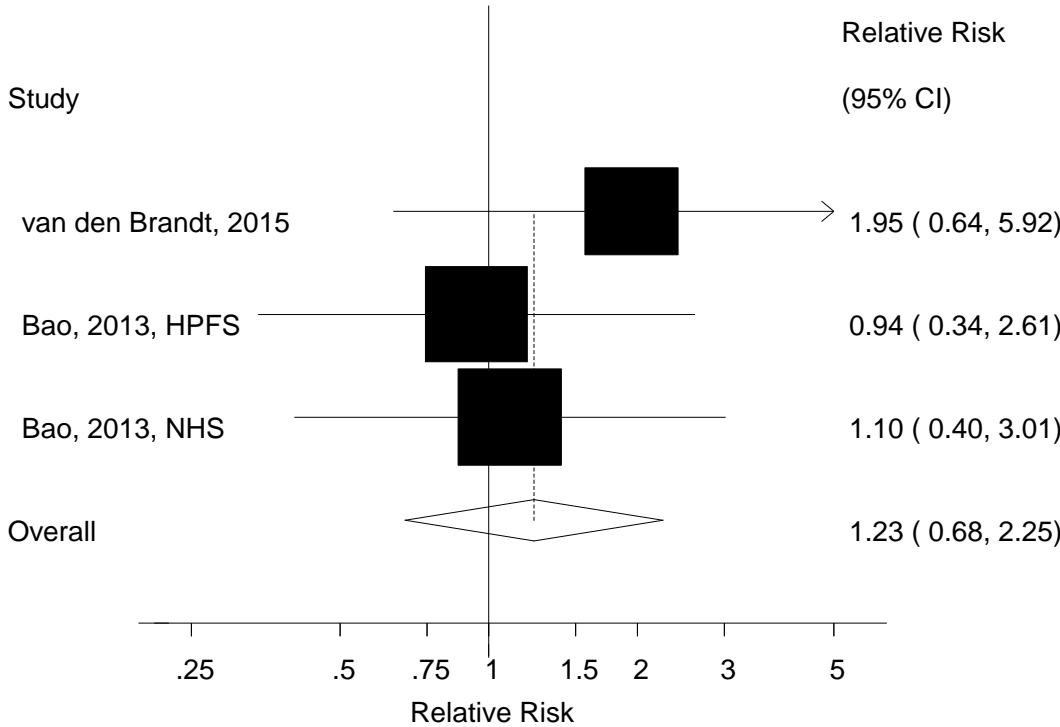



Supplementary Figure 52. Tree nuts and diabetes mortality, nonlinear dose-response analysis

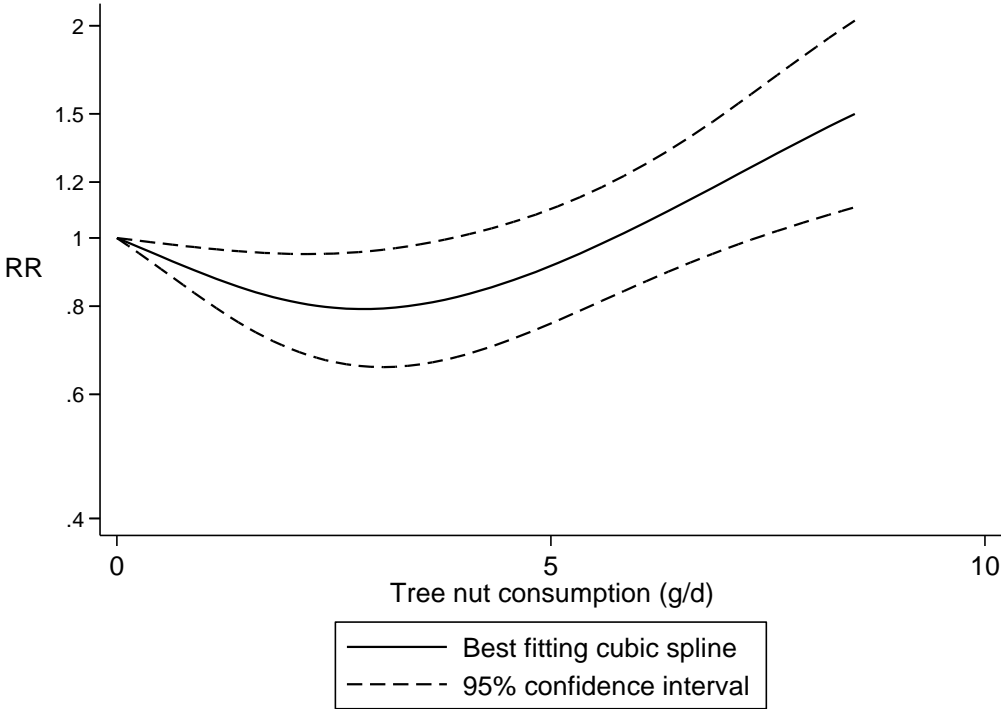

$p_{\text{nonlinearity}}=0.001$

Supplementary Figure 53. Peanuts and diabetes mortality, high vs. low analysis

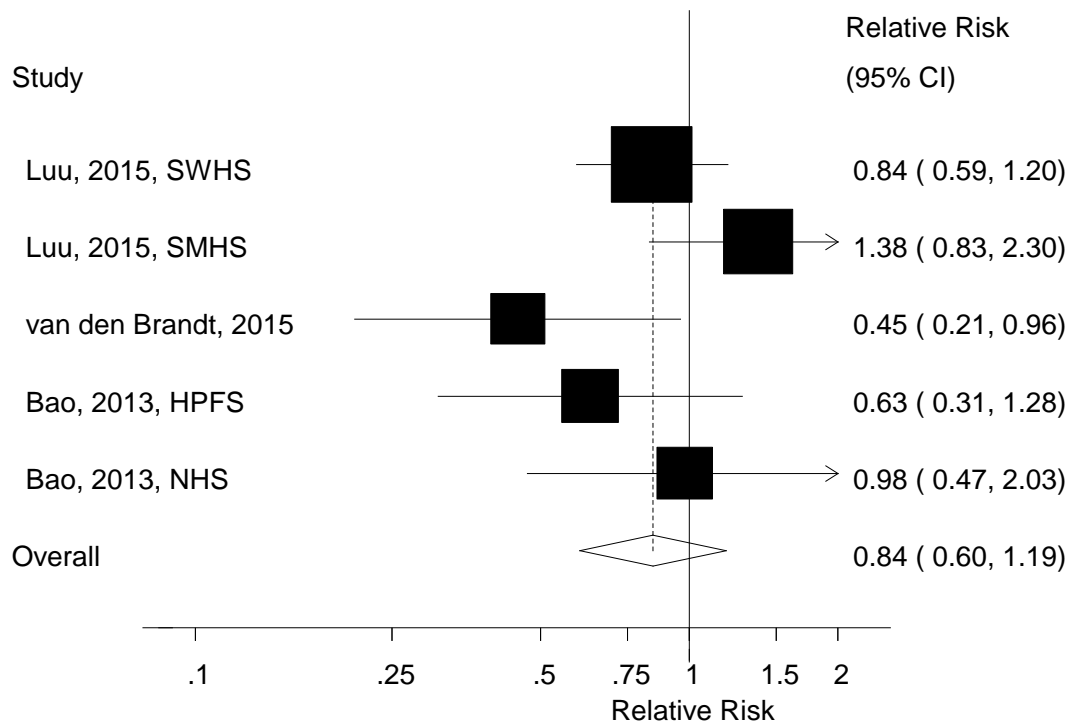

Supplementary Figure 54. Peanuts and diabetes mortality, dose-response analysis

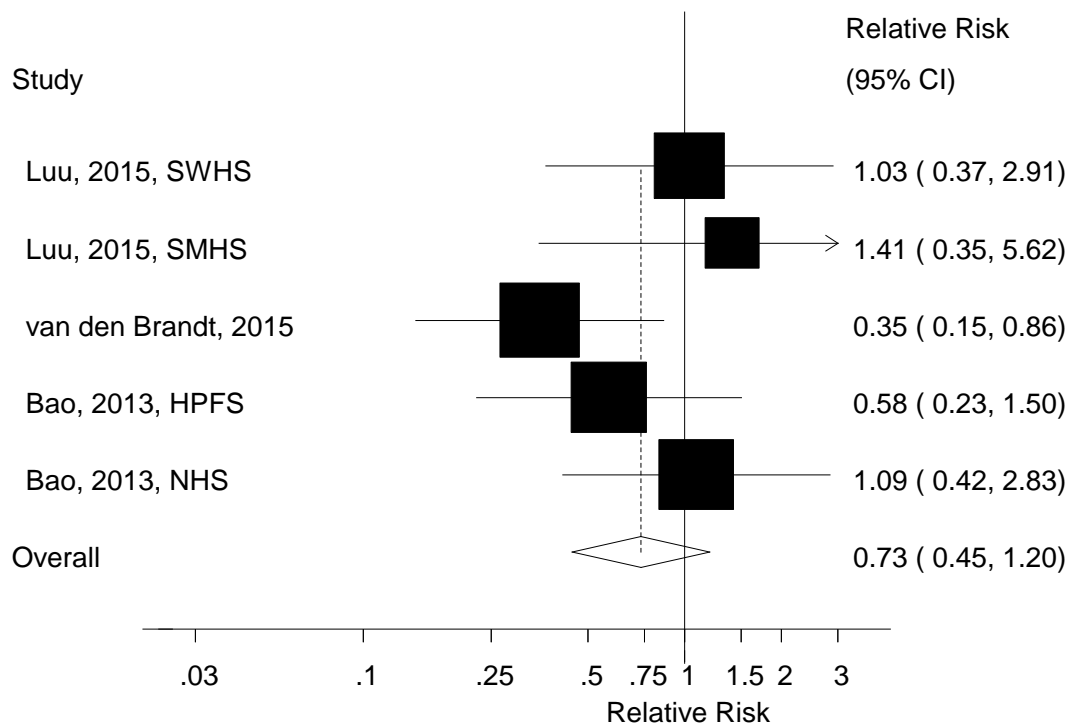

Supplementary Figure 55. Peanuts and diabetes mortality, nonlinear dose-response analysis

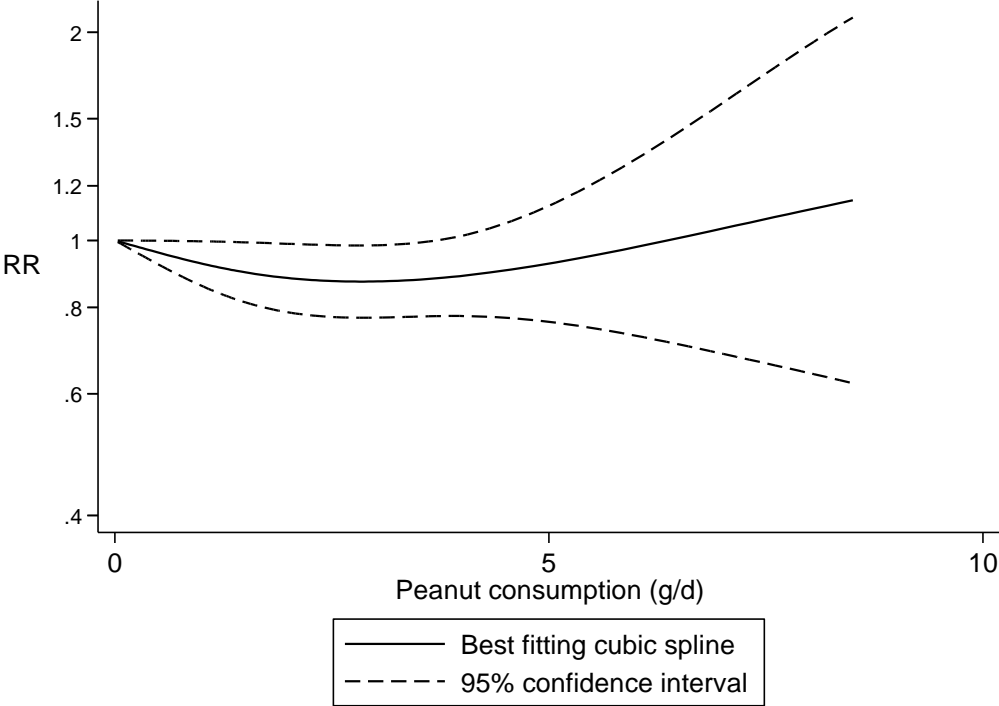

$p_{\text{nonlinearity}} < 0.0001$

Supplementary Figure 56. Tree nuts and neurodegenerative disease mortality, high vs. low analysis

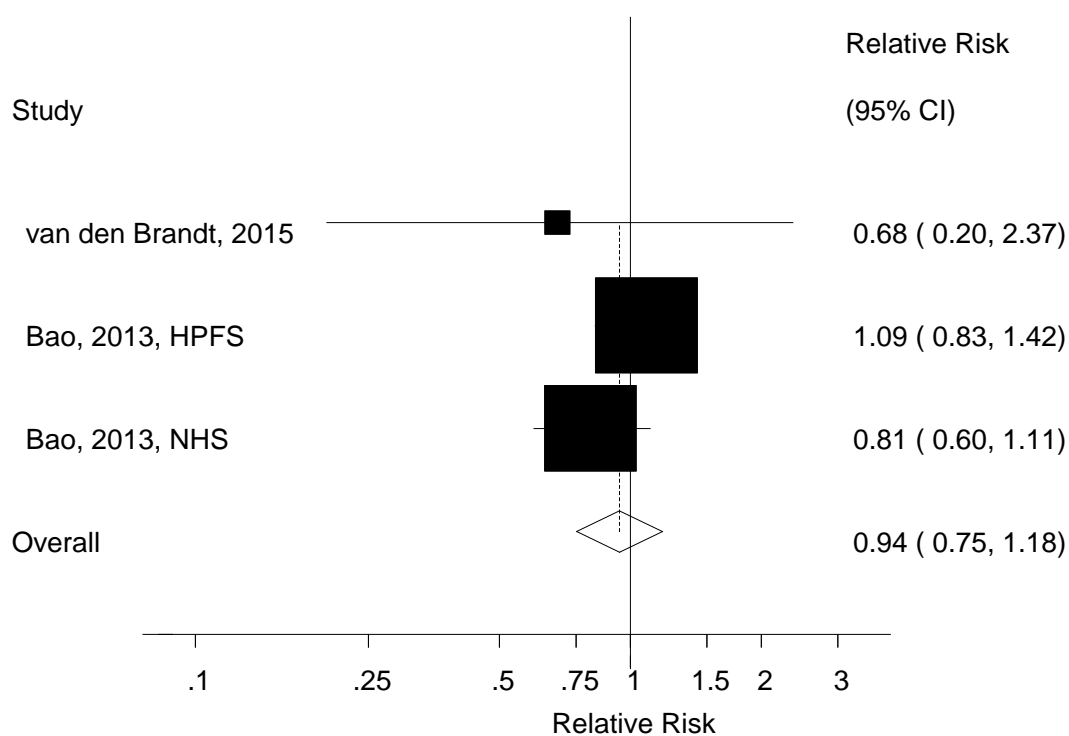

Supplementary Figure 57. Tree nuts and neurodegenerative disease mortality, dose-response analysis

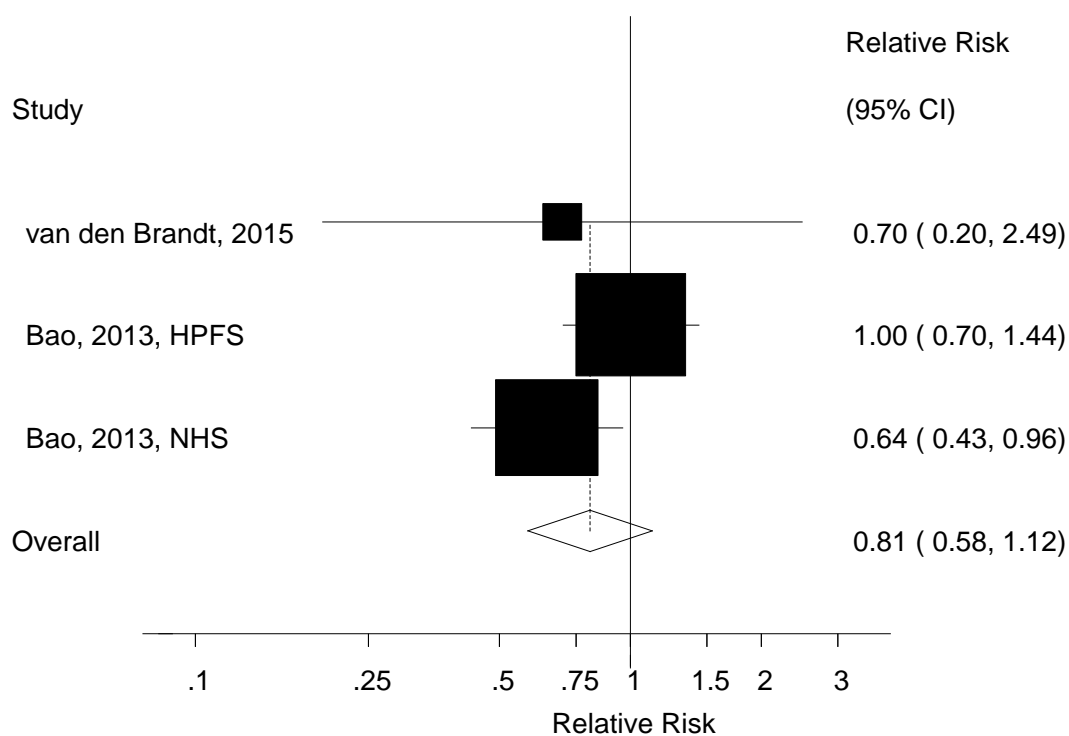

Supplementary Figure 58. Tree nuts and neurodegenerative disease mortality, nonlinear dose-response analysis

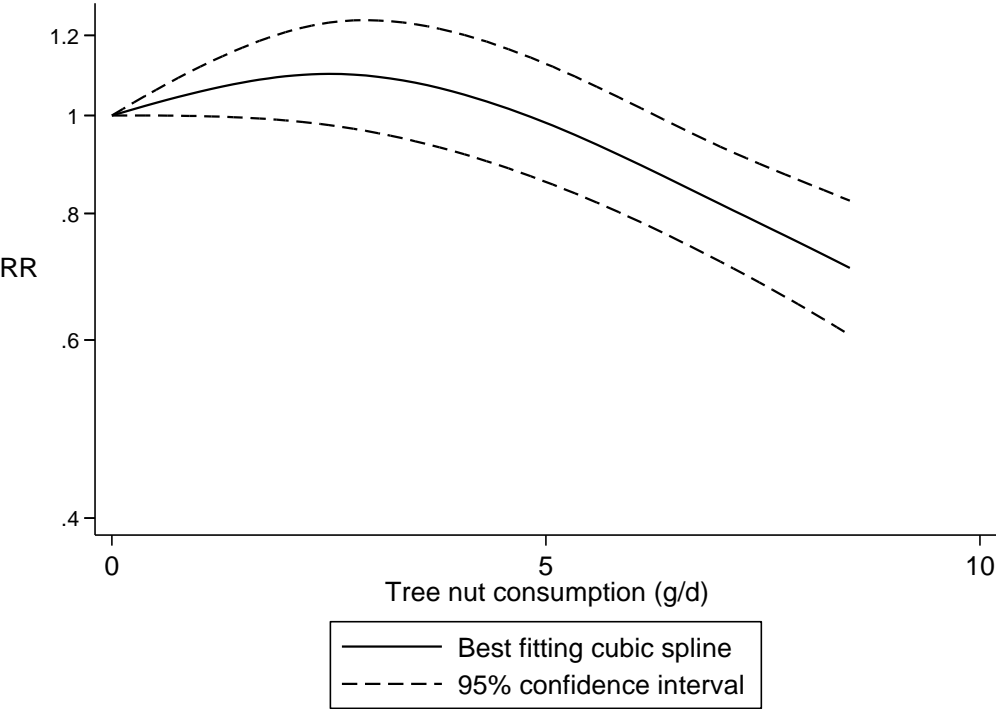

$p_{\text{nonlinearity}}=0.16$

Supplementary Figure 59. Peanuts and neurodegenerative disease mortality, high vs. low analysis

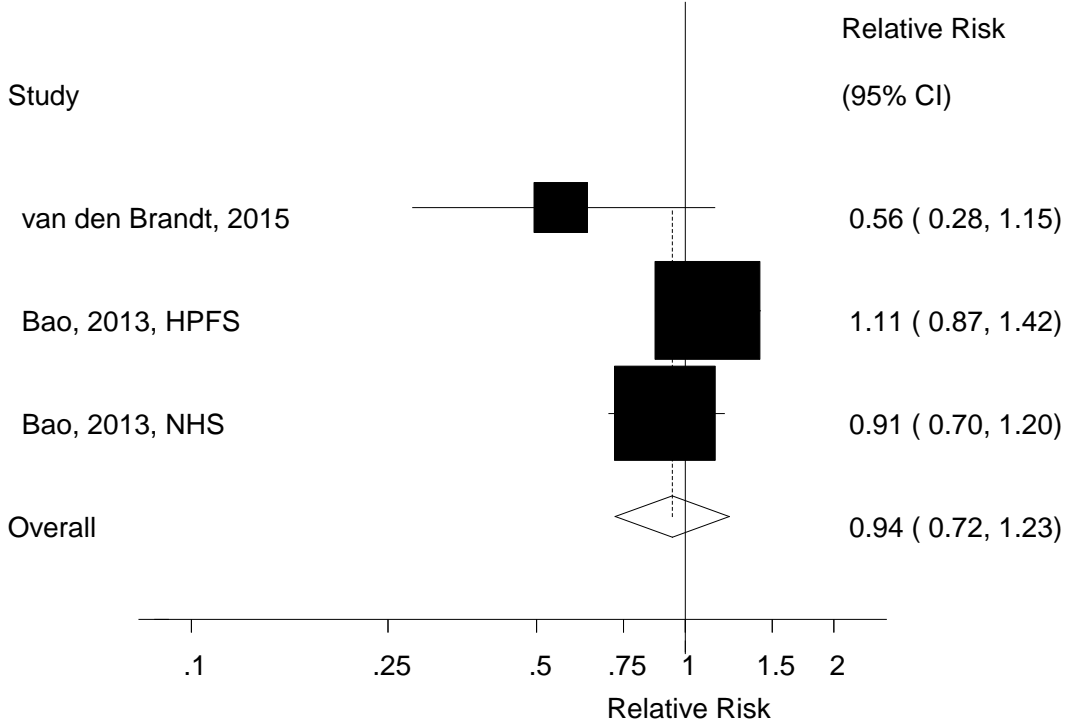

Supplementary Figure 60. Peanuts and neurodegenerative disease mortality, dose-response analysis

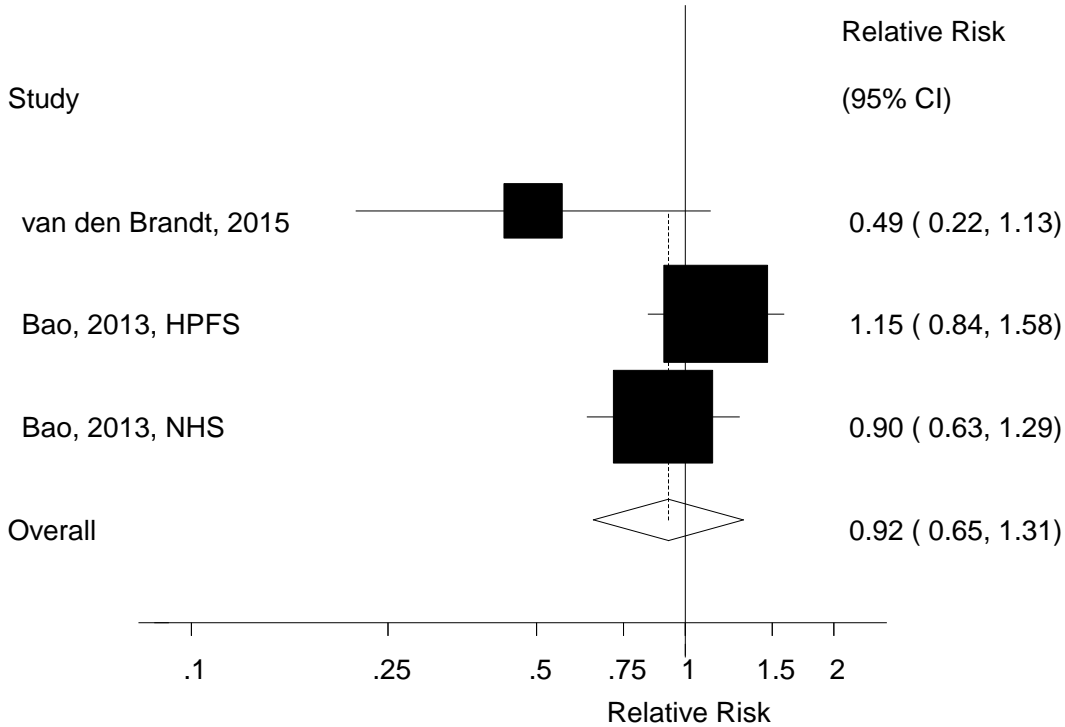

Supplementary Figure 61. Peanuts and neurodegenerative disease mortality, nonlinear dose-response analysis

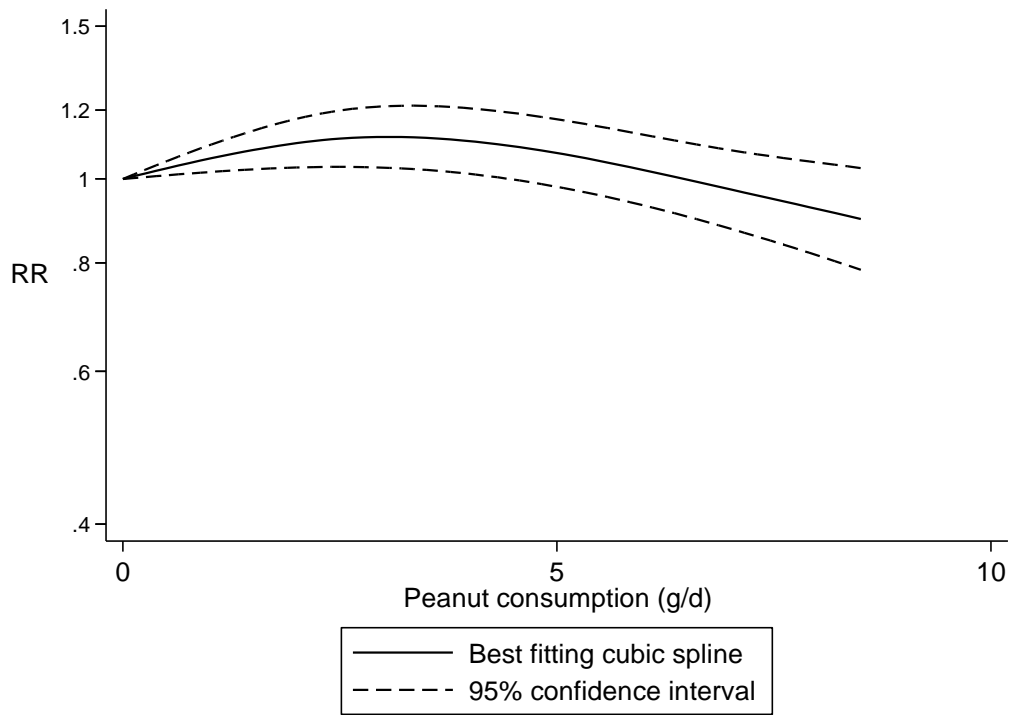

$p_{\text{nonlinearity}}=0.001$

Supplementary Figure 62. Tree nuts and infectious disease mortality, high vs. low analysis

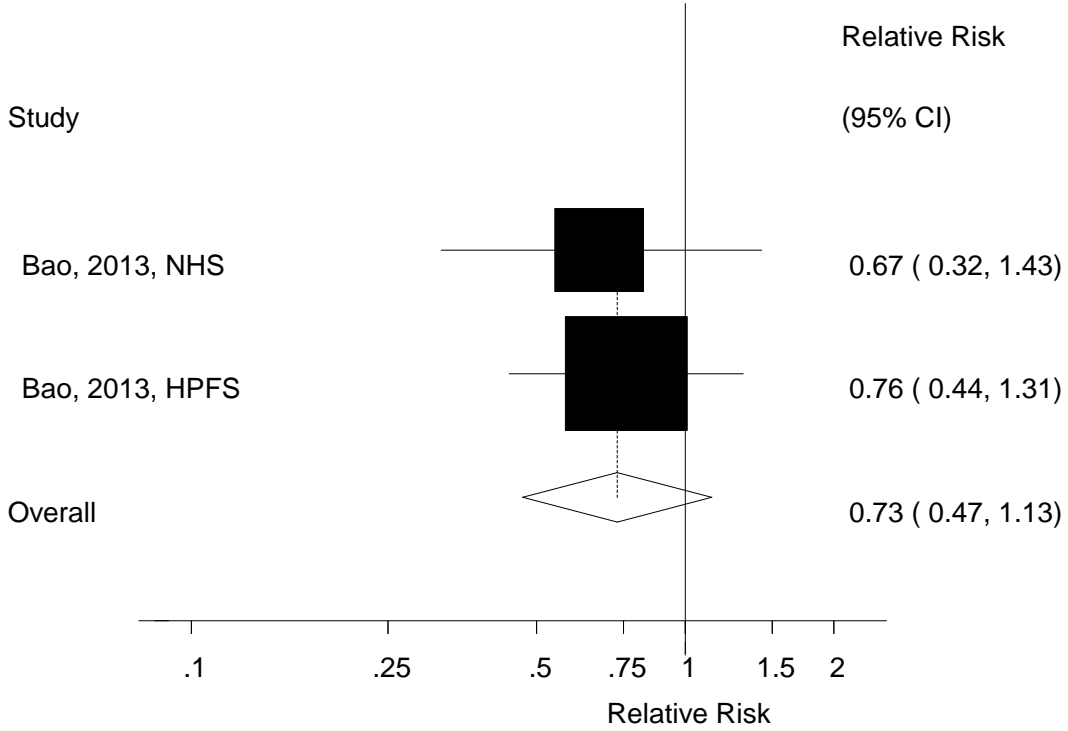

Supplementary Figure 63. Tree nuts and infectious disease mortality, dose-response analysis

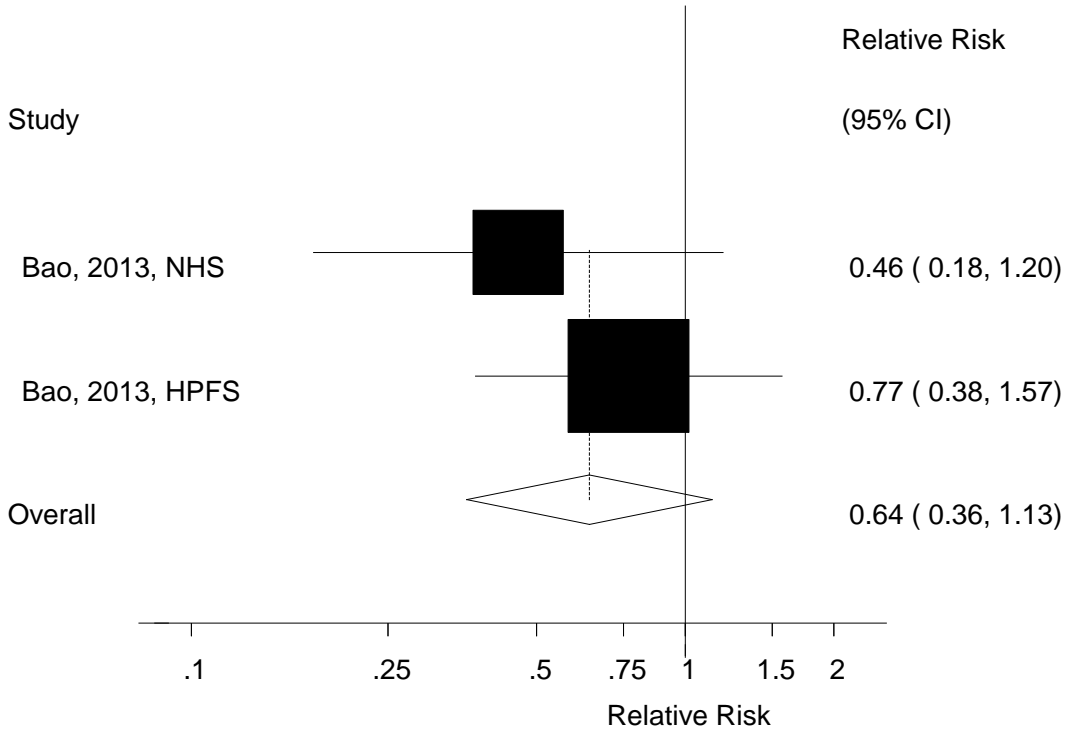



Supplementary Figure 64. Peanuts and infectious disease mortality, high vs. low analysis

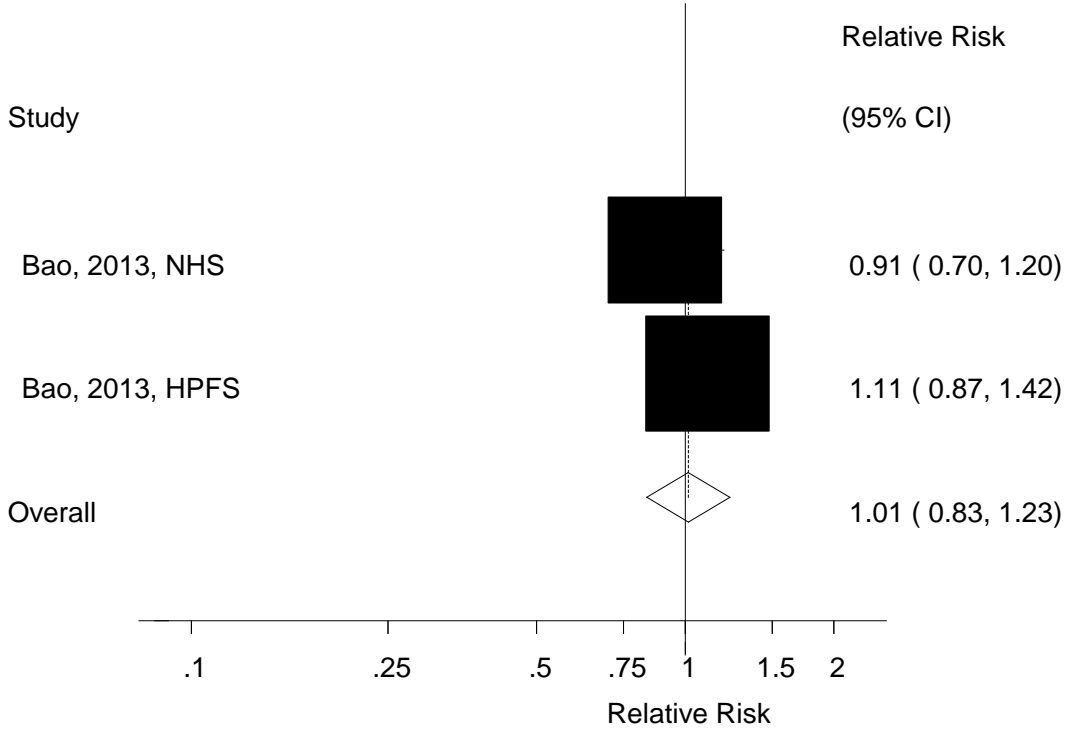

Supplementary Figure 65. Peanuts and infectious disease mortality, dose-response analysis

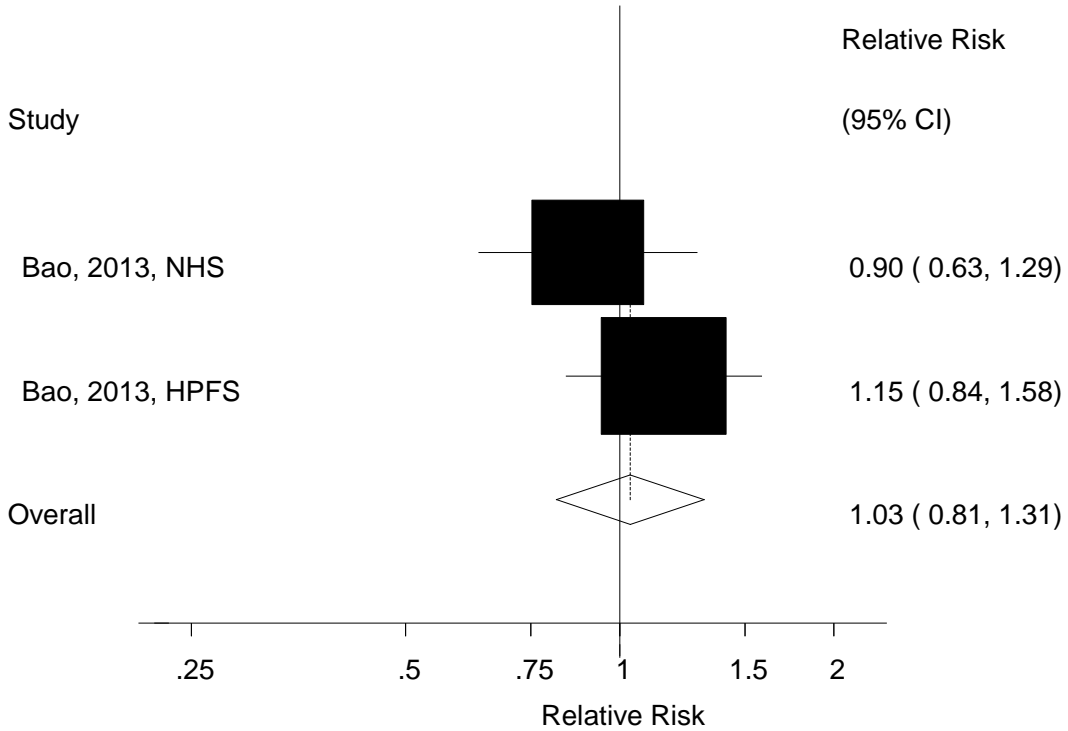

Supplementary Figure 66. Tree nuts and kidney disease mortality, high vs. low analysis

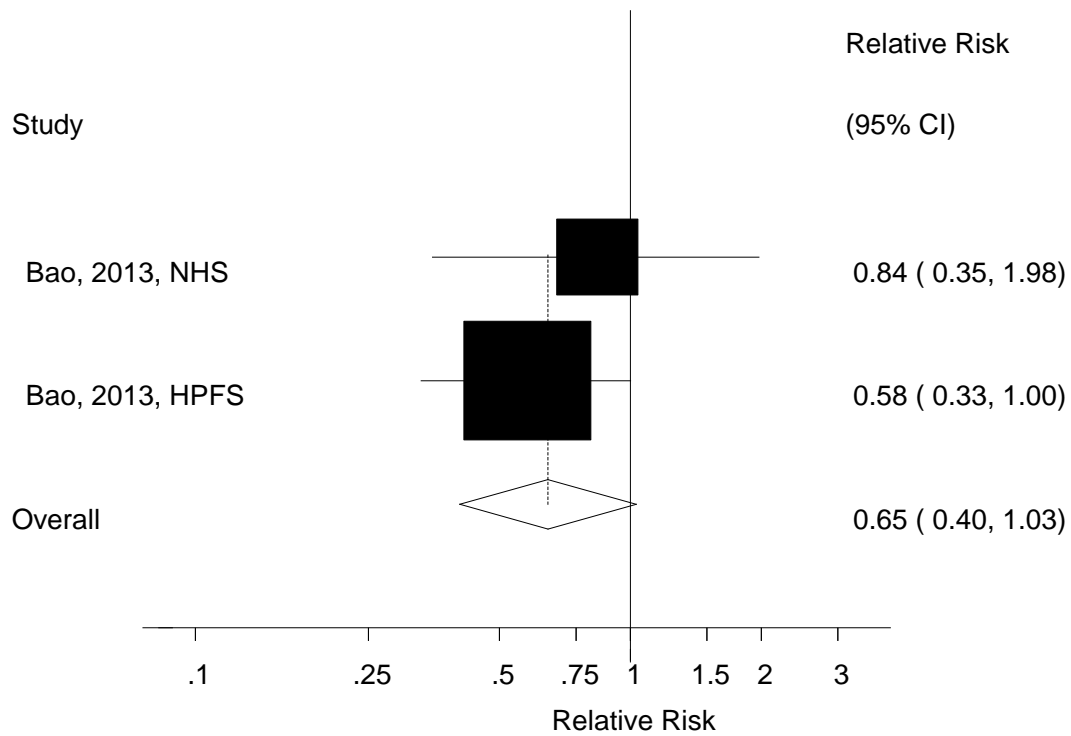

Supplementary Figure 67. Tree nuts and kidney disease mortality, dose-response analysis

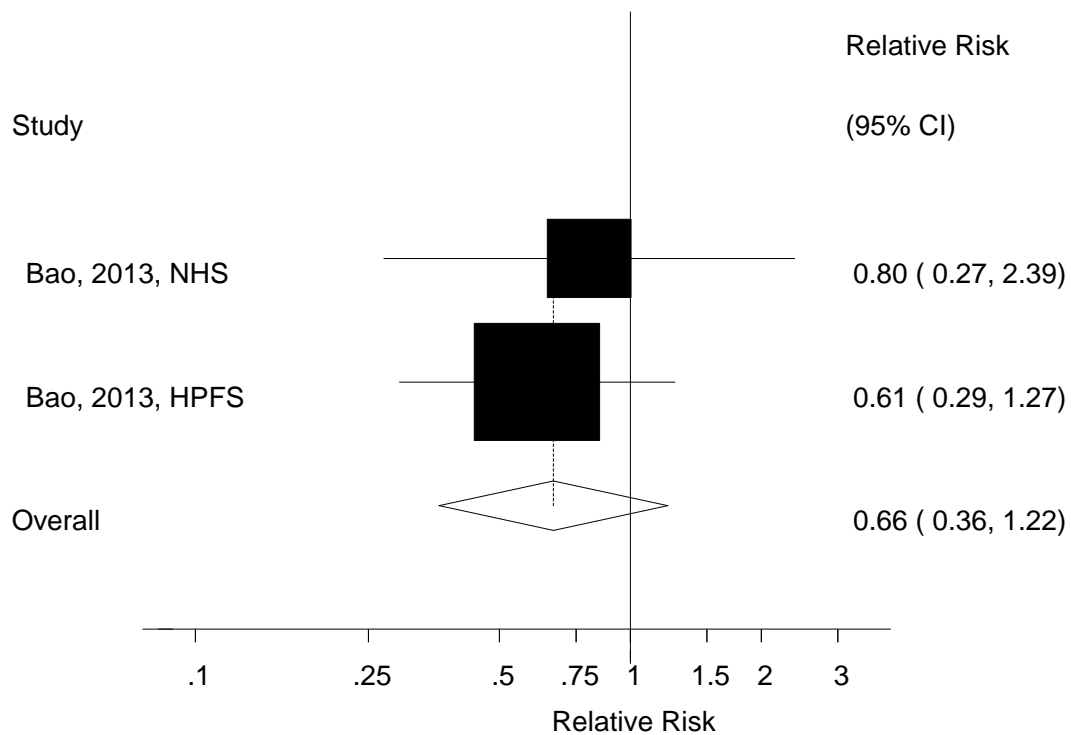

Supplementary Figure 68. Peanuts and kidney disease mortality, high vs. low analysis

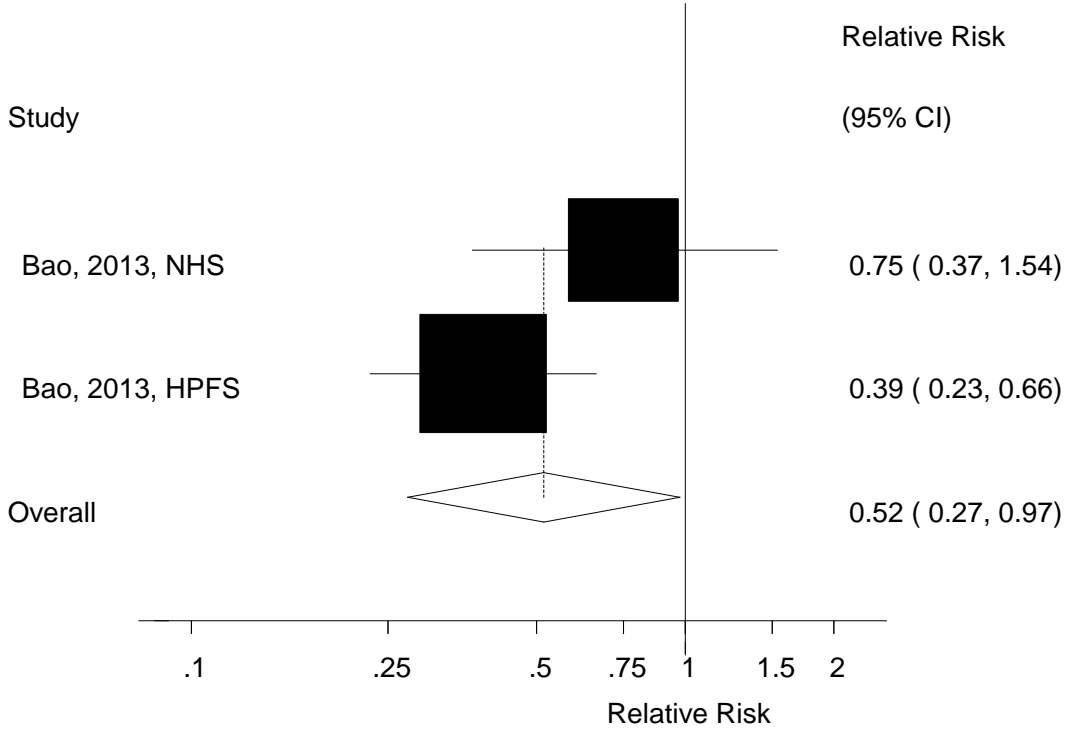

Supplementary Figure 69. Peanuts and kidney disease mortality, dose-response analysis

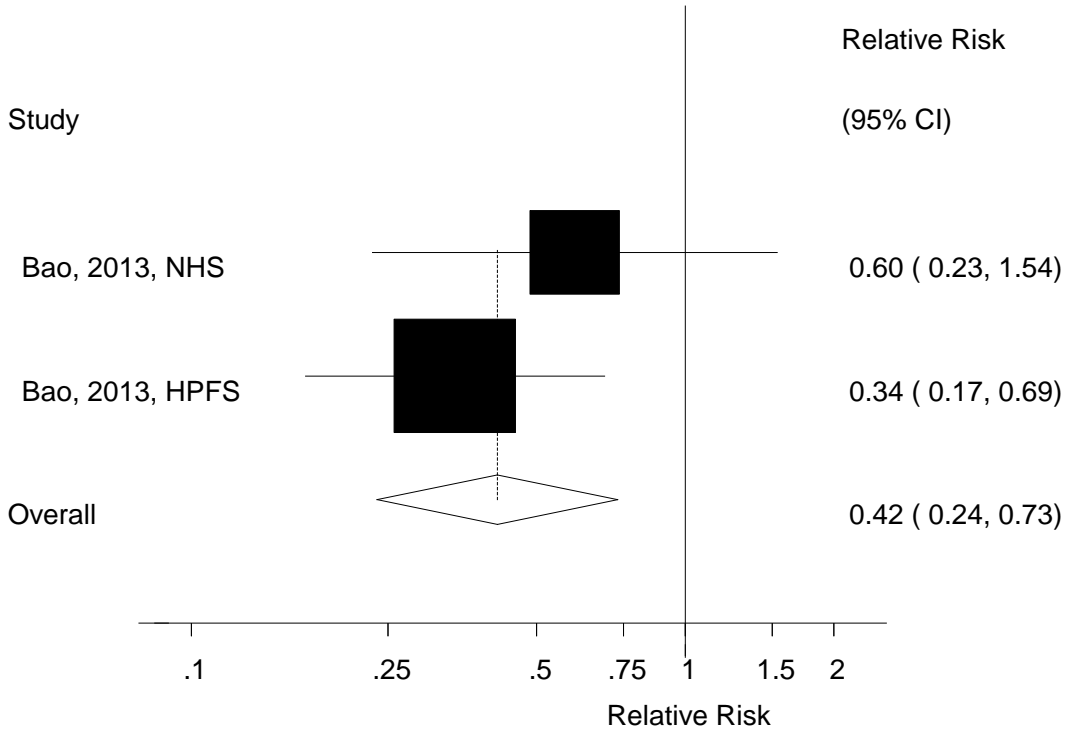

Supplementary Figure 70. Influence analysis of nuts and coronary heart disease

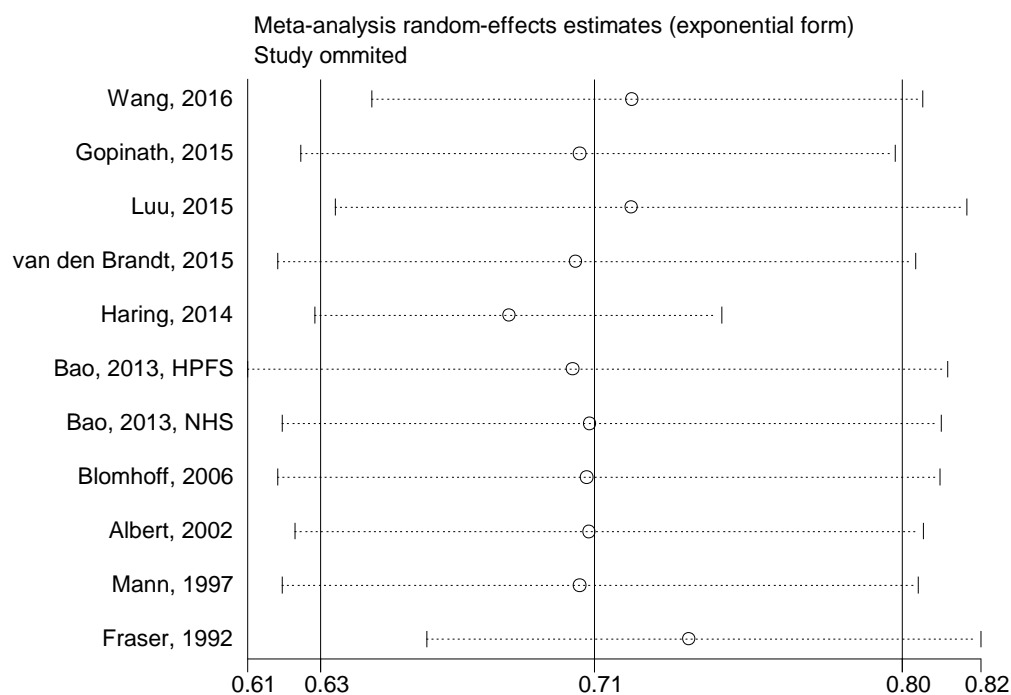

| Study omitted        | e <sup>coef.</sup> | [95% Conf. Interval]  |
|----------------------|--------------------|-----------------------|
| Wang, 2016           | 0.72052968         | 0.64619869 0.80341089 |
| Gopinath, 2015       | 0.70566195         | 0.62594962 0.79552531 |
| Luu, 2015            | 0.72032356         | 0.63579094 0.81609529 |
| van den Brandt, 2015 | 0.70455873         | 0.61944151 0.80137181 |
| Haring, 2014         | 0.68555653         | 0.62993771 0.74608612 |
| Bao, 2013, HPFS      | 0.70361555         | 0.61073756 0.81061792 |
| Bao, 2013, NHS       | 0.70846039         | 0.62067235 0.80866516 |
| Blomhoff, 2006       | 0.70759284         | 0.61933184 0.80843192 |
| Albert, 2002         | 0.70834136         | 0.6243099 0.80368328  |
| Mann, 1997           | 0.70556635         | 0.62062329 0.80213529 |
| Fraser, 1992         | 0.7367267          | 0.6618399 0.8200869   |
| Combined             | 0.7097442          | 0.63154736 0.7976232  |

Supplementary Figure 71. Influence analysis of nuts and stroke

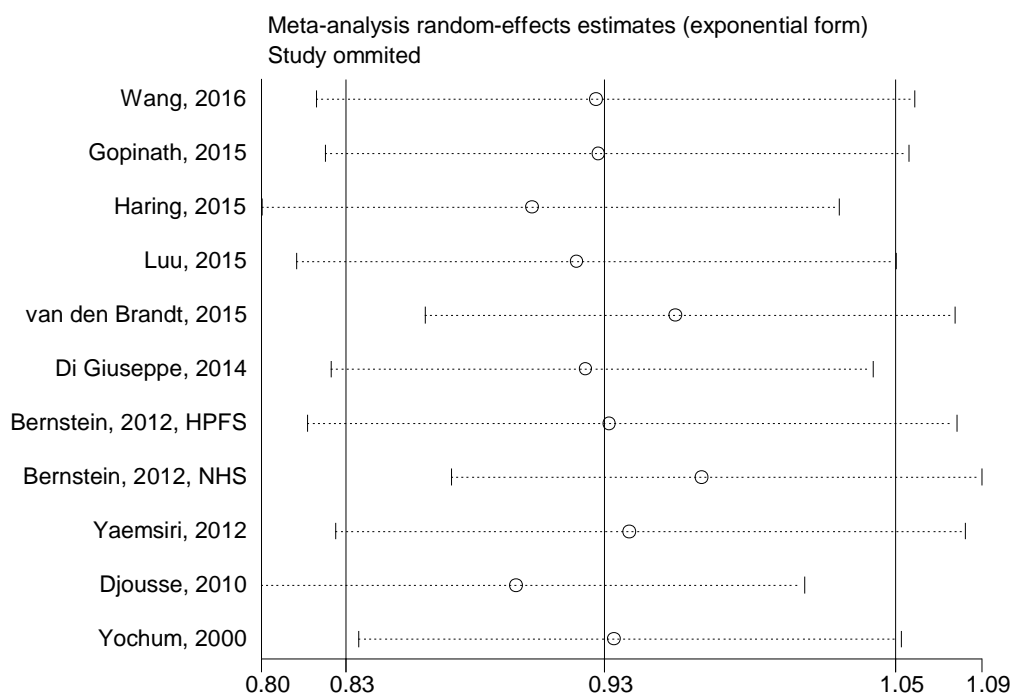

| Study omitted         | e <sup>coef.</sup> | [95% Conf. Interval] |
|-----------------------|--------------------|----------------------|
| Wang, 2016            | 0.93132597         | 0.81784934 1.0605475 |
| Gopinath, 2015        | 0.93230218         | 0.82144582 1.0581189 |
| Haring, 2015          | 0.90527499         | 0.79572052 1.0299129 |
| Luu, 2015             | 0.92347413         | 0.80986726 1.0530176 |
| van den Brandt, 2015  | 0.96344882         | 0.86191368 1.0769449 |
| Di Giuseppe, 2014     | 0.92721111         | 0.82383013 1.0435653 |
| Bernstein, 2012, HPFS | 0.93673015         | 0.8142845 1.0775882  |
| Bernstein, 2012, NHS  | 0.97423249         | 0.87249619 1.0878316 |
| Yaemsiri, 2012        | 0.94484818         | 0.82571584 1.0811687 |
| Djousse, 2010         | 0.89890766         | 0.79535866 1.0159378 |
| Yochum, 2000          | 0.93863279         | 0.83501011 1.0551146 |
| Combined              | 0.93461243         | 0.82972686 1.0527566 |

Supplementary Figure 72. Influence analysis of nuts and cardiovascular disease

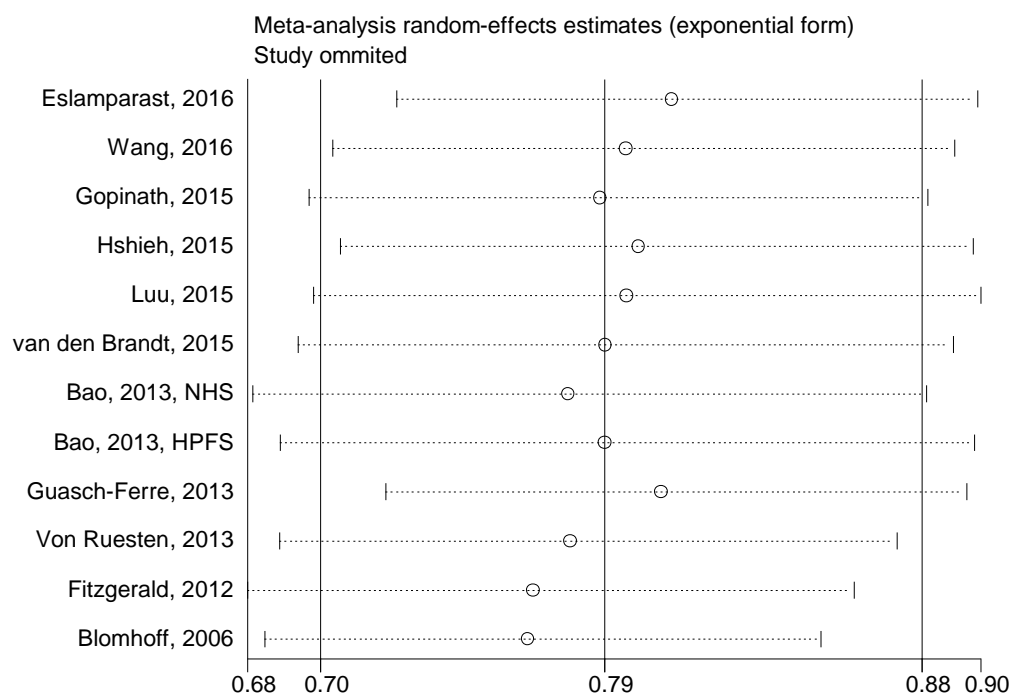

| Study omitted        | e <sup>coef.</sup> | [95% Conf. Interval] |            |
|----------------------|--------------------|----------------------|------------|
| Eslamparast, 2016    | 0.80613863         | 0.7246452            | 0.89679682 |
| Wang, 2016           | 0.79246283         | 0.70572001           | 0.88986754 |
| Gopinath, 2015       | 0.78501511         | 0.69876647           | 0.88190943 |
| Hshieh, 2015         | 0.7962243          | 0.70803815           | 0.89539397 |
| Luu, 2015            | 0.79272896         | 0.70005506           | 0.89767116 |
| van den Brandt, 2015 | 0.78652287         | 0.69546199           | 0.88950682 |
| Bao, 2013, NHS       | 0.77547973         | 0.68212789           | 0.88160712 |
| Bao, 2013, HPFS      | 0.78623897         | 0.69010103           | 0.89576983 |
| Guasch-Ferre, 2013   | 0.80284512         | 0.72145021           | 0.89342302 |
| Von Ruesten, 2013    | 0.77608901         | 0.69001567           | 0.87289923 |
| Fitzgerald, 2012     | 0.7650305          | 0.68047196           | 0.86009663 |
| Blomhoff, 2006       | 0.7635538          | 0.68561733           | 0.85034949 |
| Combined             | 0.78620925         | 0.7021711            | 0.88030537 |

Supplementary Figure 73. Influence analysis of nuts and total cancer

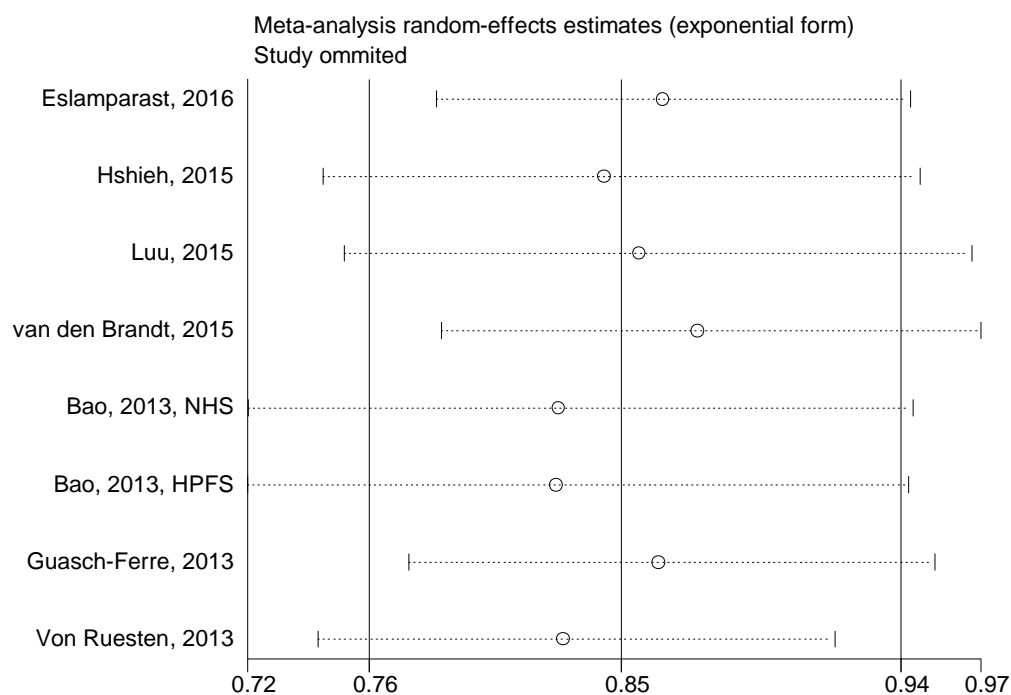

| Study omitted        | e <sup>coef.</sup> | [95% Conf. Interval]         |
|----------------------|--------------------|------------------------------|
| Eslamparast, 2016    | 0.86147064         | 0.78639811 0.94370985        |
| Hshieh, 2015         | 0.84202188         | 0.7488178 0.94682688         |
| Luu, 2015            | 0.85358477         | 0.75579917 0.9640218         |
| van den Brandt, 2015 | 0.87291747         | 0.78801918 0.9669624         |
| Bao, 2013, NHS       | 0.82687312         | 0.72396338 0.94441128        |
| Bao, 2013, HPFS      | 0.82614875         | 0.72376835 0.94301134        |
| Guasch-Ferre, 2013   | 0.86000115         | 0.77724576 0.95156777        |
| Von Ruesten, 2013    | 0.82846338         | 0.74715799 0.91861635        |
| <b>Combined</b>      | <b>0.84767489</b>  | <b>0.76404364 0.94046031</b> |

Supplementary Figure 74. Influence analysis of nuts and all-cause mortality

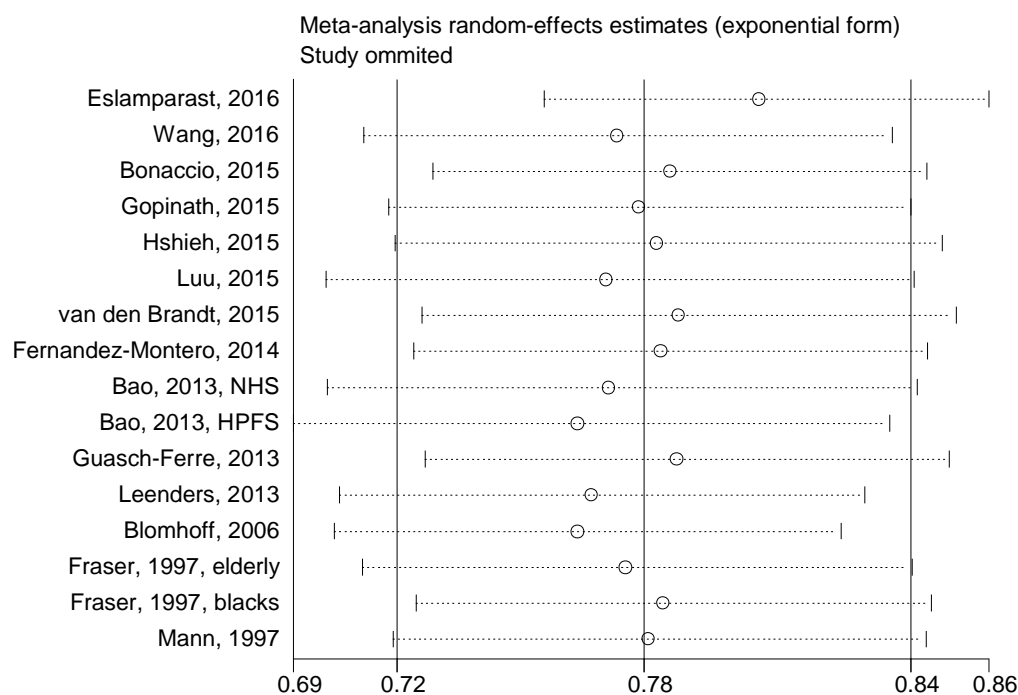

| Study omitted           | e <sup>coef.</sup> | [95% Conf. Interval]  |
|-------------------------|--------------------|-----------------------|
| Eslamparast, 2016       | 0.80678028         | 0.75485545 0.86227697 |
| Wang, 2016              | 0.77253097         | 0.71132797 0.83899987 |
| Bonaccio, 2015          | 0.78536564         | 0.72797155 0.84728473 |
| Gopinath, 2015          | 0.77780688         | 0.71734804 0.84336126 |
| Hshieh, 2015            | 0.78214961         | 0.71892047 0.85093969 |
| Luu, 2015               | 0.76988757         | 0.70216417 0.84414291 |
| van den Brandt, 2015    | 0.78726429         | 0.72540563 0.85439795 |
| Fernandez-Montero, 2014 | 0.78295243         | 0.72332704 0.84749287 |
| Bao, 2013, NHS          | 0.77043462         | 0.70251775 0.84491742 |
| Bao, 2013, HPFS         | 0.76292157         | 0.69436026 0.83825266 |
| Guasch-Ferre, 2013      | 0.78682935         | 0.72611767 0.8526172  |
| Leenders, 2013          | 0.76631898         | 0.70552975 0.83234578 |
| Blomhoff, 2006          | 0.76296216         | 0.70423567 0.82658589 |
| Fraser, 1997, elderly   | 0.77449507         | 0.71100211 0.84365797 |
| Fraser, 1997, blacks    | 0.78368533         | 0.72391659 0.84838879 |
| Mann, 1997              | 0.78010321         | 0.71841502 0.8470884  |
| Combined                | 0.77892971         | 0.71935823 0.84343441 |
